# Supplementary material for: Pathway Instability Is an Effective New Mutation-Based Type of Cancer Biomarkers
Source: Front Oncol. 2019 Jan 4;8:658. doi: 10.3389/fonc.2018.00658 (PMC6328788; doi:10.3389/fonc.2018.00658)
Supplement: Supplementary Table 1 — Tumor localizations and numbers of tumor samples investigated for each cancer type, for all mutations. [file Table_1.XLSX]

## Sheet: Sheet1
Tumor localization by COSMIC	Number of samples	Cancer type, TCGA abbreviation
Breast	807	Breast invasive carcinoma, BRCA
Central nervous system	657	Brain Lower Grade Glioma, LGG; Glioblastoma multiforme, GBM
Cervix	179	Cervical squamous cell carcinoma and endocervical adenocarcinoma,CESC
Endometrium	248	Uterine Corpus Endometrial Carcinoma, UCEC
Hematopoietic and lymphoid tissue	188	Acute Myeloid Leukemia, LAML
Kidney	601	Kidney renal papillary cell carcinoma,KIRP; Kidney renal clear cell carcinoma,KIRC
Large intestine	620	Colorectal cancer, COADREAD
Liver	188	Liver Cancer, LICA; Liver hepatocellular carcinoma, LIHC
Lung	569	Lung adenocarcinoma, LUAD; Lung squamous cell carcinoma, LUSC
Ovary	474	Ovarian serous cystadenocarcinoma, OV
Prostate	256	Prostate adenocarcinoma,PRAD
Skin	341	Skin Cutaneous Melanoma, SKCM
Stomach	288	Stomach adenocarcinoma, STAD
Thyroid	403	Thyroid carcinoma, THCA
Urinary tract	137	Bladder Urothelial Carcinoma, BLCA
