# Supplementary material for: Pathway Instability Is an Effective New Mutation-Based Type of Cancer Biomarkers
Source: Front Oncol. 2019 Jan 4;8:658. doi: 10.3389/fonc.2018.00658 (PMC6328788; doi:10.3389/fonc.2018.00658)
Supplement: Supplementary Table 5 — AUC values for comparisons of every separately taken tumor type (localization) versus all other tumor types, calculated for all mutations. The sheet “Pathway biomarkers” contains AUC values and AUC 95% confidence intervals for pathways having AUC > 0.75 in at least one of the comparisons. The sheet “Gene biomarkers” includes AUC values and AUC 95% confidence intervals for genes having AUC > 0.75 in at least one of the comparisons. [file Table_5.XLSX]

## Sheet: Pathway biomarkers
Pathway ID	breast	central_nervous_system	cervix	endometrium	haematopoietic_and_lymphoid_tissue	kidney	large_intestine	liver	lung	ovary	prostate	skin	stomach	thyroid	urinary_tract
3-phosphoinositide_biosynthesis	0.609; 95% CI: (0.59;0.628)	0.587; 95% CI: (0.57;0.603)	0.52; 95% CI: (0.518;0.558)	0.817; 95% CI: (0.788;0.846)	0.688; 95% CI: (0.678;0.698)	0.629; 95% CI: (0.614;0.643)	0.67; 95% CI: (0.648;0.693)	0.578; 95% CI: (0.549;0.607)	0.585; 95% CI: (0.563;0.607)	0.646; 95% CI: (0.631;0.66)	0.617; 95% CI: (0.595;0.639)	0.57; 95% CI: (0.542;0.599)	0.541; 95% CI: (0.51;0.573)	0.684; 95% CI: (0.673;0.695)	0.518; 95% CI: (0.522;0.558)
3-phosphoinositide_degradation	0.502; 95% CI: (0.514;0.518)	0.549; 95% CI: (0.533;0.565)	0.518; 95% CI: (0.514;0.55)	0.783; 95% CI: (0.751;0.816)	0.63; 95% CI: (0.619;0.641)	0.578; 95% CI: (0.564;0.593)	0.631; 95% CI: (0.61;0.652)	0.57; 95% CI: (0.546;0.595)	0.582; 95% CI: (0.561;0.603)	0.606; 95% CI: (0.594;0.619)	0.576; 95% CI: (0.555;0.597)	0.603; 95% CI: (0.575;0.631)	0.519; 95% CI: (0.509;0.547)	0.633; 95% CI: (0.623;0.642)	0.525; 95% CI: (0.513;0.563)
Akt_Pathway_Regulation_by_GH	0.605; 95% CI: (0.587;0.624)	0.62; 95% CI: (0.603;0.636)	0.542; 95% CI: (0.504;0.581)	0.784; 95% CI: (0.755;0.812)	0.668; 95% CI: (0.649;0.688)	0.6; 95% CI: (0.582;0.618)	0.669; 95% CI: (0.647;0.691)	0.572; 95% CI: (0.54;0.603)	0.603; 95% CI: (0.581;0.626)	0.657; 95% CI: (0.642;0.673)	0.634; 95% CI: (0.612;0.657)	0.58; 95% CI: (0.55;0.61)	0.531; 95% CI: (0.501;0.564)	0.671; 95% CI: (0.655;0.688)	0.529; 95% CI: (0.514;0.573)
Akt_Signaling_Pathway	0.546; 95% CI: (0.529;0.564)	0.599; 95% CI: (0.579;0.618)	0.551; 95% CI: (0.514;0.588)	0.689; 95% CI: (0.662;0.716)	0.842; 95% CI: (0.818;0.866)	0.733; 95% CI: (0.717;0.748)	0.799; 95% CI: (0.778;0.82)	0.522; 95% CI: (0.51;0.554)	0.774; 95% CI: (0.756;0.792)	0.616; 95% CI: (0.598;0.634)	0.755; 95% CI: (0.73;0.78)	0.711; 95% CI: (0.682;0.74)	0.627; 95% CI: (0.596;0.658)	0.844; 95% CI: (0.831;0.858)	0.607; 95% CI: (0.571;0.643)
Akt_Signaling_Pathway_NFAT_degradation	0.602; 95% CI: (0.584;0.621)	0.545; 95% CI: (0.526;0.564)	0.534; 95% CI: (0.505;0.573)	0.86; 95% CI: (0.834;0.886)	0.708; 95% CI: (0.697;0.719)	0.619; 95% CI: (0.602;0.635)	0.671; 95% CI: (0.649;0.692)	0.578; 95% CI: (0.546;0.61)	0.569; 95% CI: (0.547;0.592)	0.667; 95% CI: (0.652;0.681)	0.646; 95% CI: (0.625;0.667)	0.576; 95% CI: (0.546;0.605)	0.528; 95% CI: (0.504;0.561)	0.702; 95% CI: (0.69;0.713)	0.512; 95% CI: (0.532;0.555)
ATM_Pathway	0.529; 95% CI: (0.509;0.55)	0.522; 95% CI: (0.501;0.545)	0.604; 95% CI: (0.573;0.635)	0.528; 95% CI: (0.507;0.563)	0.714; 95% CI: (0.691;0.738)	0.7; 95% CI: (0.686;0.715)	0.726; 95% CI: (0.705;0.747)	0.549; 95% CI: (0.51;0.588)	0.687; 95% CI: (0.665;0.709)	0.595; 95% CI: (0.575;0.616)	0.681; 95% CI: (0.656;0.705)	0.535; 95% CI: (0.508;0.563)	0.574; 95% CI: (0.543;0.605)	0.762; 95% CI: (0.752;0.773)	0.536; 95% CI: (0.504;0.575)
biocarta_actions_of_nitric_oxide_in_the_heart_Main_Pathway	0.6; 95% CI: (0.582;0.619)	0.63; 95% CI: (0.613;0.647)	0.517; 95% CI: (0.52;0.555)	0.779; 95% CI: (0.75;0.807)	0.717; 95% CI: (0.702;0.731)	0.647; 95% CI: (0.631;0.664)	0.693; 95% CI: (0.671;0.715)	0.574; 95% CI: (0.543;0.605)	0.666; 95% CI: (0.644;0.687)	0.666; 95% CI: (0.649;0.682)	0.634; 95% CI: (0.61;0.659)	0.637; 95% CI: (0.608;0.667)	0.565; 95% CI: (0.531;0.599)	0.721; 95% CI: (0.708;0.733)	0.523; 95% CI: (0.52;0.567)
biocarta_akt_signaling_Main_Pathway	0.606; 95% CI: (0.588;0.624)	0.56; 95% CI: (0.545;0.576)	0.56; 95% CI: (0.524;0.595)	0.829; 95% CI: (0.802;0.857)	0.636; 95% CI: (0.63;0.641)	0.602; 95% CI: (0.589;0.614)	0.614; 95% CI: (0.593;0.636)	0.583; 95% CI: (0.561;0.605)	0.526; 95% CI: (0.506;0.546)	0.615; 95% CI: (0.604;0.626)	0.593; 95% CI: (0.575;0.611)	0.506; 95% CI: (0.519;0.532)	0.528; 95% CI: (0.5;0.556)	0.628; 95% CI: (0.619;0.638)	0.515; 95% CI: (0.524;0.553)
biocarta_b_cell_survival_Main_Pathway	0.627; 95% CI: (0.609;0.646)	0.57; 95% CI: (0.555;0.584)	0.561; 95% CI: (0.525;0.598)	0.838; 95% CI: (0.811;0.866)	0.631; 95% CI: (0.621;0.64)	0.582; 95% CI: (0.568;0.595)	0.611; 95% CI: (0.59;0.632)	0.582; 95% CI: (0.56;0.604)	0.517; 95% CI: (0.502;0.537)	0.62; 95% CI: (0.609;0.63)	0.6; 95% CI: (0.584;0.617)	0.516; 95% CI: (0.508;0.539)	0.524; 95% CI: (0.504;0.552)	0.625; 95% CI: (0.615;0.636)	0.533; 95% CI: (0.501;0.567)
biocarta_bioactive_peptide_induced_signaling_Main_Pathway	0.616; 95% CI: (0.598;0.635)	0.6; 95% CI: (0.585;0.615)	0.522; 95% CI: (0.513;0.558)	0.81; 95% CI: (0.782;0.837)	0.66; 95% CI: (0.649;0.671)	0.628; 95% CI: (0.615;0.642)	0.671; 95% CI: (0.649;0.692)	0.609; 95% CI: (0.586;0.632)	0.575; 95% CI: (0.553;0.596)	0.635; 95% CI: (0.622;0.648)	0.611; 95% CI: (0.591;0.631)	0.571; 95% CI: (0.542;0.6)	0.531; 95% CI: (0.501;0.561)	0.662; 95% CI: (0.652;0.672)	0.505; 95% CI: (0.536;0.545)
biocarta_ctcf_first_multivalent_nuclear_factor_Main_Pathway	0.591; 95% CI: (0.573;0.609)	0.543; 95% CI: (0.525;0.561)	0.544; 95% CI: (0.507;0.58)	0.867; 95% CI: (0.842;0.891)	0.671; 95% CI: (0.661;0.681)	0.604; 95% CI: (0.589;0.62)	0.649; 95% CI: (0.627;0.671)	0.598; 95% CI: (0.573;0.623)	0.551; 95% CI: (0.528;0.573)	0.646; 95% CI: (0.634;0.659)	0.619; 95% CI: (0.599;0.639)	0.543; 95% CI: (0.514;0.572)	0.546; 95% CI: (0.515;0.577)	0.673; 95% CI: (0.663;0.682)	0.538; 95% CI: (0.5;0.576)
biocarta_cxcr4_signaling_Main_Pathway	0.607; 95% CI: (0.589;0.625)	0.564; 95% CI: (0.549;0.578)	0.538; 95% CI: (0.504;0.573)	0.815; 95% CI: (0.787;0.844)	0.627; 95% CI: (0.619;0.635)	0.604; 95% CI: (0.593;0.616)	0.628; 95% CI: (0.607;0.65)	0.582; 95% CI: (0.56;0.603)	0.527; 95% CI: (0.507;0.548)	0.618; 95% CI: (0.609;0.628)	0.588; 95% CI: (0.57;0.606)	0.511; 95% CI: (0.513;0.536)	0.507; 95% CI: (0.519;0.533)	0.606; 95% CI: (0.592;0.619)	0.52; 95% CI: (0.515;0.555)
biocarta_egf_signaling_Main_Pathway	0.647; 95% CI: (0.629;0.666)	0.549; 95% CI: (0.53;0.567)	0.52; 95% CI: (0.517;0.557)	0.793; 95% CI: (0.764;0.822)	0.682; 95% CI: (0.67;0.694)	0.639; 95% CI: (0.625;0.653)	0.646; 95% CI: (0.624;0.669)	0.598; 95% CI: (0.571;0.625)	0.59; 95% CI: (0.568;0.612)	0.657; 95% CI: (0.642;0.671)	0.619; 95% CI: (0.596;0.642)	0.521; 95% CI: (0.508;0.55)	0.519; 95% CI: (0.512;0.55)	0.664; 95% CI: (0.649;0.679)	0.511; 95% CI: (0.529;0.552)
biocarta_erk_and_pi_3_kinase_are_necessary_for_collagen_binding_in_corneal_epithelia_Main_Pathway	0.604; 95% CI: (0.585;0.622)	0.623; 95% CI: (0.607;0.638)	0.543; 95% CI: (0.505;0.581)	0.803; 95% CI: (0.773;0.832)	0.688; 95% CI: (0.676;0.699)	0.62; 95% CI: (0.604;0.636)	0.68; 95% CI: (0.658;0.701)	0.59; 95% CI: (0.56;0.62)	0.596; 95% CI: (0.574;0.618)	0.655; 95% CI: (0.641;0.669)	0.633; 95% CI: (0.613;0.654)	0.58; 95% CI: (0.551;0.608)	0.581; 95% CI: (0.548;0.614)	0.685; 95% CI: (0.674;0.696)	0.563; 95% CI: (0.519;0.607)
biocarta_fc_epsilon_receptor_i_signaling_in_mast_cells_Main_Pathway	0.636; 95% CI: (0.618;0.654)	0.611; 95% CI: (0.596;0.626)	0.526; 95% CI: (0.51;0.562)	0.786; 95% CI: (0.758;0.814)	0.67; 95% CI: (0.658;0.683)	0.631; 95% CI: (0.617;0.645)	0.661; 95% CI: (0.639;0.683)	0.613; 95% CI: (0.588;0.638)	0.577; 95% CI: (0.554;0.599)	0.653; 95% CI: (0.64;0.666)	0.606; 95% CI: (0.583;0.629)	0.601; 95% CI: (0.571;0.631)	0.531; 95% CI: (0.5;0.562)	0.653; 95% CI: (0.638;0.668)	0.502; 95% CI: (0.54;0.543)
biocarta_fc_epsilon_receptor_i_signaling_in_mast_cells_Pathway_(degranulation)	0.622; 95% CI: (0.604;0.64)	0.572; 95% CI: (0.558;0.587)	0.537; 95% CI: (0.503;0.571)	0.821; 95% CI: (0.793;0.849)	0.636; 95% CI: (0.63;0.642)	0.611; 95% CI: (0.6;0.623)	0.612; 95% CI: (0.591;0.633)	0.597; 95% CI: (0.578;0.616)	0.541; 95% CI: (0.52;0.562)	0.62; 95% CI: (0.609;0.631)	0.597; 95% CI: (0.58;0.614)	0.556; 95% CI: (0.528;0.584)	0.517; 95% CI: (0.51;0.544)	0.634; 95% CI: (0.626;0.642)	0.52; 95% CI: (0.515;0.554)
biocarta_growth_hormone_signaling_Main_Pathway	0.621; 95% CI: (0.602;0.64)	0.59; 95% CI: (0.575;0.606)	0.518; 95% CI: (0.518;0.553)	0.807; 95% CI: (0.778;0.836)	0.655; 95% CI: (0.641;0.669)	0.617; 95% CI: (0.602;0.631)	0.656; 95% CI: (0.635;0.678)	0.593; 95% CI: (0.567;0.619)	0.577; 95% CI: (0.555;0.598)	0.632; 95% CI: (0.618;0.645)	0.613; 95% CI: (0.592;0.633)	0.56; 95% CI: (0.53;0.589)	0.515; 95% CI: (0.514;0.544)	0.663; 95% CI: (0.653;0.673)	0.52; 95% CI: (0.517;0.557)
biocarta_human_cytomegalovirus_and_map_kinase_pathways_Main_Pathway	0.632; 95% CI: (0.614;0.65)	0.553; 95% CI: (0.536;0.57)	0.561; 95% CI: (0.525;0.598)	0.819; 95% CI: (0.792;0.847)	0.642; 95% CI: (0.63;0.654)	0.61; 95% CI: (0.597;0.624)	0.613; 95% CI: (0.591;0.635)	0.584; 95% CI: (0.56;0.609)	0.533; 95% CI: (0.512;0.553)	0.623; 95% CI: (0.61;0.635)	0.604; 95% CI: (0.585;0.622)	0.505; 95% CI: (0.521;0.532)	0.508; 95% CI: (0.52;0.537)	0.64; 95% CI: (0.629;0.65)	0.51; 95% CI: (0.531;0.55)
biocarta_igf_1_signaling_Main_Pathway	0.605; 95% CI: (0.587;0.624)	0.582; 95% CI: (0.567;0.597)	0.537; 95% CI: (0.502;0.573)	0.815; 95% CI: (0.788;0.842)	0.624; 95% CI: (0.607;0.641)	0.609; 95% CI: (0.596;0.623)	0.631; 95% CI: (0.609;0.653)	0.578; 95% CI: (0.552;0.603)	0.542; 95% CI: (0.521;0.563)	0.627; 95% CI: (0.614;0.64)	0.604; 95% CI: (0.584;0.624)	0.534; 95% CI: (0.506;0.561)	0.527; 95% CI: (0.502;0.557)	0.623; 95% CI: (0.608;0.638)	0.52; 95% CI: (0.521;0.561)
biocarta_il_2_receptor_beta_chain_in_t_cell_activation_Main_Pathway	0.612; 95% CI: (0.593;0.63)	0.587; 95% CI: (0.57;0.604)	0.531; 95% CI: (0.506;0.568)	0.797; 95% CI: (0.769;0.825)	0.673; 95% CI: (0.657;0.689)	0.628; 95% CI: (0.613;0.644)	0.65; 95% CI: (0.627;0.672)	0.575; 95% CI: (0.545;0.605)	0.598; 95% CI: (0.576;0.621)	0.646; 95% CI: (0.632;0.661)	0.623; 95% CI: (0.6;0.645)	0.567; 95% CI: (0.536;0.597)	0.52; 95% CI: (0.512;0.551)	0.66; 95% CI: (0.644;0.676)	0.534; 95% CI: (0.511;0.579)
biocarta_il_2_receptor_beta_chain_in_t_cell_activation_Pathway_(apoptosis)	0.618; 95% CI: (0.6;0.635)	0.551; 95% CI: (0.537;0.565)	0.578; 95% CI: (0.543;0.614)	0.835; 95% CI: (0.808;0.863)	0.61; 95% CI: (0.602;0.618)	0.593; 95% CI: (0.582;0.603)	0.597; 95% CI: (0.576;0.617)	0.578; 95% CI: (0.56;0.597)	0.512; 95% CI: (0.505;0.529)	0.605; 95% CI: (0.596;0.614)	0.581; 95% CI: (0.566;0.597)	0.514; 95% CI: (0.508;0.537)	0.512; 95% CI: (0.514;0.537)	0.607; 95% CI: (0.598;0.615)	0.512; 95% CI: (0.522;0.546)
biocarta_il_2_receptor_beta_chain_in_t_cell_activation_Pathway_(cell_proliferation)	0.607; 95% CI: (0.589;0.625)	0.566; 95% CI: (0.552;0.58)	0.536; 95% CI: (0.502;0.57)	0.829; 95% CI: (0.801;0.857)	0.621; 95% CI: (0.612;0.63)	0.591; 95% CI: (0.578;0.603)	0.59; 95% CI: (0.569;0.611)	0.58; 95% CI: (0.558;0.601)	0.52; 95% CI: (0.5;0.539)	0.609; 95% CI: (0.599;0.62)	0.585; 95% CI: (0.567;0.603)	0.502; 95% CI: (0.522;0.527)	0.538; 95% CI: (0.51;0.566)	0.603; 95% CI: (0.589;0.616)	0.505; 95% CI: (0.532;0.542)
biocarta_il_7_signal_transduction_Main_Pathway	0.62; 95% CI: (0.601;0.638)	0.588; 95% CI: (0.573;0.603)	0.556; 95% CI: (0.52;0.593)	0.822; 95% CI: (0.794;0.85)	0.653; 95% CI: (0.644;0.662)	0.617; 95% CI: (0.604;0.629)	0.636; 95% CI: (0.614;0.658)	0.568; 95% CI: (0.54;0.595)	0.56; 95% CI: (0.539;0.582)	0.625; 95% CI: (0.613;0.638)	0.609; 95% CI: (0.591;0.628)	0.512; 95% CI: (0.514;0.538)	0.526; 95% CI: (0.504;0.556)	0.65; 95% CI: (0.64;0.66)	0.538; 95% CI: (0.501;0.578)
biocarta_inactivation_of_gsk3_by_akt_causes_accumulation_of_b_catenin_in_alveolar_macrophages_Main_Pathway	0.608; 95% CI: (0.59;0.626)	0.587; 95% CI: (0.571;0.602)	0.542; 95% CI: (0.506;0.578)	0.845; 95% CI: (0.818;0.872)	0.656; 95% CI: (0.647;0.665)	0.612; 95% CI: (0.599;0.626)	0.633; 95% CI: (0.611;0.655)	0.511; 95% CI: (0.52;0.542)	0.544; 95% CI: (0.523;0.565)	0.638; 95% CI: (0.626;0.65)	0.596; 95% CI: (0.575;0.617)	0.512; 95% CI: (0.514;0.539)	0.545; 95% CI: (0.515;0.576)	0.646; 95% CI: (0.635;0.657)	0.506; 95% CI: (0.532;0.545)
biocarta_influence_of_ras_and_rho_proteins_on_g1_to_s_transition_Main_Pathway	0.618; 95% CI: (0.601;0.636)	0.57; 95% CI: (0.556;0.585)	0.576; 95% CI: (0.54;0.612)	0.827; 95% CI: (0.8;0.854)	0.63; 95% CI: (0.622;0.638)	0.608; 95% CI: (0.596;0.619)	0.611; 95% CI: (0.59;0.632)	0.587; 95% CI: (0.567;0.608)	0.506; 95% CI: (0.513;0.525)	0.621; 95% CI: (0.611;0.63)	0.586; 95% CI: (0.567;0.605)	0.533; 95% CI: (0.506;0.56)	0.515; 95% CI: (0.512;0.542)	0.603; 95% CI: (0.589;0.618)	0.512; 95% CI: (0.524;0.549)
biocarta_inhibition_of_cellular_proliferation_by_gleevec_Main_Pathway	0.641; 95% CI: (0.623;0.659)	0.601; 95% CI: (0.586;0.615)	0.538; 95% CI: (0.502;0.575)	0.812; 95% CI: (0.784;0.84)	0.657; 95% CI: (0.647;0.667)	0.613; 95% CI: (0.599;0.627)	0.645; 95% CI: (0.623;0.667)	0.592; 95% CI: (0.567;0.617)	0.553; 95% CI: (0.532;0.575)	0.637; 95% CI: (0.625;0.65)	0.61; 95% CI: (0.591;0.63)	0.514; 95% CI: (0.513;0.541)	0.518; 95% CI: (0.512;0.547)	0.627; 95% CI: (0.611;0.642)	0.522; 95% CI: (0.519;0.563)
biocarta_insulin_signaling_Main_Pathway	0.611; 95% CI: (0.593;0.629)	0.565; 95% CI: (0.551;0.58)	0.526; 95% CI: (0.509;0.56)	0.832; 95% CI: (0.804;0.859)	0.598; 95% CI: (0.579;0.617)	0.598; 95% CI: (0.586;0.611)	0.601; 95% CI: (0.58;0.622)	0.582; 95% CI: (0.561;0.604)	0.525; 95% CI: (0.505;0.545)	0.605; 95% CI: (0.593;0.617)	0.585; 95% CI: (0.565;0.604)	0.505; 95% CI: (0.519;0.529)	0.521; 95% CI: (0.506;0.549)	0.606; 95% CI: (0.592;0.62)	0.522; 95% CI: (0.513;0.557)
biocarta_lissencephaly_gene_lis1_in_neuronal_migration_and_development_Main_Pathway	0.503; 95% CI: (0.514;0.521)	0.617; 95% CI: (0.604;0.631)	0.509; 95% CI: (0.528;0.545)	0.538; 95% CI: (0.504;0.572)	0.659; 95% CI: (0.648;0.67)	0.595; 95% CI: (0.579;0.61)	0.667; 95% CI: (0.646;0.688)	0.515; 95% CI: (0.518;0.548)	0.64; 95% CI: (0.618;0.662)	0.601; 95% CI: (0.584;0.617)	0.622; 95% CI: (0.604;0.641)	0.759; 95% CI: (0.732;0.785)	0.559; 95% CI: (0.527;0.59)	0.65; 95% CI: (0.637;0.662)	0.567; 95% CI: (0.524;0.611)
biocarta_lissencephaly_gene_lis1_in_neuronal_migration_and_development_Pathway_(retrograde_axon_cargo_transport)	0.51; 95% CI: (0.507;0.526)	0.61; 95% CI: (0.596;0.623)	0.503; 95% CI: (0.532;0.539)	0.537; 95% CI: (0.504;0.57)	0.65; 95% CI: (0.639;0.662)	0.591; 95% CI: (0.576;0.607)	0.656; 95% CI: (0.635;0.677)	0.509; 95% CI: (0.523;0.542)	0.635; 95% CI: (0.613;0.657)	0.596; 95% CI: (0.58;0.612)	0.617; 95% CI: (0.599;0.636)	0.768; 95% CI: (0.741;0.794)	0.562; 95% CI: (0.53;0.593)	0.649; 95% CI: (0.639;0.659)	0.563; 95% CI: (0.52;0.606)
biocarta_nerve_growth_factor_pathway_ngf__Main_Pathway	0.608; 95% CI: (0.59;0.627)	0.574; 95% CI: (0.56;0.588)	0.544; 95% CI: (0.509;0.579)	0.809; 95% CI: (0.78;0.837)	0.628; 95% CI: (0.617;0.64)	0.601; 95% CI: (0.588;0.613)	0.613; 95% CI: (0.592;0.635)	0.581; 95% CI: (0.558;0.604)	0.519; 95% CI: (0.5;0.539)	0.615; 95% CI: (0.603;0.627)	0.59; 95% CI: (0.571;0.609)	0.525; 95% CI: (0.501;0.552)	0.532; 95% CI: (0.503;0.56)	0.609; 95% CI: (0.595;0.623)	0.518; 95% CI: (0.523;0.558)
biocarta_nfat_and_hypertrophy_of_the_heart__Main_Pathway	0.598; 95% CI: (0.58;0.616)	0.619; 95% CI: (0.604;0.634)	0.517; 95% CI: (0.518;0.552)	0.773; 95% CI: (0.744;0.801)	0.668; 95% CI: (0.651;0.684)	0.633; 95% CI: (0.618;0.648)	0.695; 95% CI: (0.674;0.717)	0.579; 95% CI: (0.55;0.609)	0.608; 95% CI: (0.585;0.631)	0.648; 95% CI: (0.634;0.662)	0.625; 95% CI: (0.602;0.647)	0.572; 95% CI: (0.542;0.603)	0.543; 95% CI: (0.512;0.574)	0.656; 95% CI: (0.64;0.672)	0.537; 95% CI: (0.506;0.58)
biocarta_pdgf_signaling_Main_Pathway	0.644; 95% CI: (0.626;0.663)	0.602; 95% CI: (0.586;0.618)	0.525; 95% CI: (0.512;0.561)	0.8; 95% CI: (0.772;0.828)	0.677; 95% CI: (0.665;0.689)	0.627; 95% CI: (0.612;0.641)	0.658; 95% CI: (0.636;0.68)	0.59; 95% CI: (0.562;0.618)	0.579; 95% CI: (0.557;0.6)	0.649; 95% CI: (0.635;0.663)	0.613; 95% CI: (0.59;0.635)	0.545; 95% CI: (0.516;0.575)	0.521; 95% CI: (0.51;0.551)	0.656; 95% CI: (0.641;0.672)	0.525; 95% CI: (0.517;0.567)
biocarta_phospholipids_as_signalling_intermediaries_Main_Pathway	0.603; 95% CI: (0.584;0.622)	0.605; 95% CI: (0.588;0.621)	0.517; 95% CI: (0.52;0.554)	0.793; 95% CI: (0.766;0.82)	0.689; 95% CI: (0.675;0.703)	0.636; 95% CI: (0.621;0.652)	0.682; 95% CI: (0.66;0.703)	0.592; 95% CI: (0.562;0.621)	0.599; 95% CI: (0.576;0.622)	0.667; 95% CI: (0.653;0.681)	0.623; 95% CI: (0.599;0.647)	0.642; 95% CI: (0.612;0.672)	0.519; 95% CI: (0.513;0.551)	0.668; 95% CI: (0.651;0.684)	0.535; 95% CI: (0.508;0.578)
biocarta_phospholipids_as_signalling_intermediaries_Pathway_(lamellipodium_assembly)	0.611; 95% CI: (0.593;0.628)	0.561; 95% CI: (0.547;0.574)	0.555; 95% CI: (0.521;0.589)	0.836; 95% CI: (0.809;0.863)	0.612; 95% CI: (0.604;0.619)	0.588; 95% CI: (0.577;0.6)	0.593; 95% CI: (0.573;0.614)	0.574; 95% CI: (0.554;0.594)	0.506; 95% CI: (0.512;0.525)	0.605; 95% CI: (0.595;0.614)	0.576; 95% CI: (0.559;0.593)	0.535; 95% CI: (0.515;0.555)	0.532; 95% CI: (0.505;0.56)	0.604; 95% CI: (0.594;0.614)	0.509; 95% CI: (0.528;0.545)
biocarta_pten_dependent_cell_cycle_arrest_and_apoptosis_Main_Pathway	0.611; 95% CI: (0.593;0.63)	0.518; 95% CI: (0.5;0.536)	0.532; 95% CI: (0.503;0.566)	0.883; 95% CI: (0.859;0.908)	0.642; 95% CI: (0.63;0.653)	0.594; 95% CI: (0.579;0.608)	0.607; 95% CI: (0.586;0.628)	0.591; 95% CI: (0.567;0.614)	0.509; 95% CI: (0.511;0.529)	0.63; 95% CI: (0.619;0.642)	0.6; 95% CI: (0.581;0.619)	0.509; 95% CI: (0.516;0.535)	0.519; 95% CI: (0.509;0.548)	0.642; 95% CI: (0.632;0.653)	0.516; 95% CI: (0.521;0.553)
biocarta_rac1_cell_motility_signaling_Main_Pathway	0.618; 95% CI: (0.6;0.637)	0.623; 95% CI: (0.606;0.639)	0.549; 95% CI: (0.509;0.588)	0.792; 95% CI: (0.763;0.821)	0.696; 95% CI: (0.683;0.709)	0.637; 95% CI: (0.621;0.652)	0.698; 95% CI: (0.677;0.72)	0.595; 95% CI: (0.565;0.624)	0.603; 95% CI: (0.58;0.626)	0.66; 95% CI: (0.645;0.675)	0.622; 95% CI: (0.598;0.646)	0.596; 95% CI: (0.566;0.626)	0.55; 95% CI: (0.517;0.582)	0.702; 95% CI: (0.69;0.713)	0.544; 95% CI: (0.502;0.586)
biocarta_ras_independent_pathway_in_nk_cell_mediated_cytotoxicity_Main_Pathway	0.596; 95% CI: (0.579;0.614)	0.577; 95% CI: (0.562;0.591)	0.551; 95% CI: (0.515;0.586)	0.799; 95% CI: (0.772;0.826)	0.642; 95% CI: (0.635;0.649)	0.599; 95% CI: (0.585;0.612)	0.622; 95% CI: (0.6;0.643)	0.577; 95% CI: (0.552;0.602)	0.536; 95% CI: (0.515;0.557)	0.624; 95% CI: (0.612;0.635)	0.593; 95% CI: (0.574;0.612)	0.588; 95% CI: (0.559;0.617)	0.521; 95% CI: (0.507;0.55)	0.642; 95% CI: (0.634;0.65)	0.505; 95% CI: (0.534;0.544)
biocarta_regulation_of_bad_phosphorylation_Main_Pathway	0.61; 95% CI: (0.592;0.629)	0.582; 95% CI: (0.567;0.598)	0.528; 95% CI: (0.508;0.563)	0.813; 95% CI: (0.786;0.839)	0.645; 95% CI: (0.631;0.658)	0.616; 95% CI: (0.603;0.63)	0.666; 95% CI: (0.644;0.689)	0.601; 95% CI: (0.578;0.625)	0.556; 95% CI: (0.534;0.578)	0.632; 95% CI: (0.62;0.645)	0.619; 95% CI: (0.602;0.637)	0.547; 95% CI: (0.52;0.574)	0.542; 95% CI: (0.512;0.572)	0.654; 95% CI: (0.645;0.664)	0.521; 95% CI: (0.516;0.558)
biocarta_regulation_of_eif_4e_and_p70s6_kinase_Main_Pathway	0.625; 95% CI: (0.607;0.644)	0.545; 95% CI: (0.527;0.564)	0.547; 95% CI: (0.51;0.584)	0.872; 95% CI: (0.847;0.897)	0.685; 95% CI: (0.676;0.694)	0.602; 95% CI: (0.586;0.618)	0.635; 95% CI: (0.612;0.657)	0.626; 95% CI: (0.602;0.649)	0.563; 95% CI: (0.542;0.585)	0.649; 95% CI: (0.635;0.663)	0.628; 95% CI: (0.608;0.649)	0.549; 95% CI: (0.52;0.578)	0.502; 95% CI: (0.528;0.531)	0.679; 95% CI: (0.669;0.69)	0.536; 95% CI: (0.504;0.575)
biocarta_role_of_erbb2_in_signal_transduction_and_oncology_Main_Pathway	0.603; 95% CI: (0.584;0.622)	0.548; 95% CI: (0.529;0.567)	0.553; 95% CI: (0.515;0.592)	0.805; 95% CI: (0.777;0.834)	0.679; 95% CI: (0.664;0.693)	0.643; 95% CI: (0.629;0.657)	0.67; 95% CI: (0.648;0.692)	0.608; 95% CI: (0.581;0.635)	0.578; 95% CI: (0.556;0.599)	0.663; 95% CI: (0.65;0.676)	0.619; 95% CI: (0.595;0.642)	0.547; 95% CI: (0.518;0.576)	0.556; 95% CI: (0.524;0.587)	0.663; 95% CI: (0.647;0.679)	0.509; 95% CI: (0.533;0.55)
biocarta_role_of_erk5_in_neuronal_survival_Main_Pathway	0.61; 95% CI: (0.592;0.628)	0.591; 95% CI: (0.576;0.606)	0.553; 95% CI: (0.517;0.589)	0.809; 95% CI: (0.783;0.836)	0.655; 95% CI: (0.642;0.667)	0.618; 95% CI: (0.604;0.632)	0.645; 95% CI: (0.623;0.667)	0.581; 95% CI: (0.553;0.608)	0.556; 95% CI: (0.535;0.578)	0.639; 95% CI: (0.626;0.651)	0.603; 95% CI: (0.581;0.624)	0.553; 95% CI: (0.523;0.582)	0.534; 95% CI: (0.503;0.564)	0.634; 95% CI: (0.619;0.65)	0.503; 95% CI: (0.539;0.544)
biocarta_role_of_erk5_in_neuronal_survival_Pathway_(cell_survival)	0.618; 95% CI: (0.6;0.636)	0.559; 95% CI: (0.545;0.573)	0.56; 95% CI: (0.525;0.595)	0.834; 95% CI: (0.808;0.861)	0.623; 95% CI: (0.617;0.628)	0.596; 95% CI: (0.584;0.607)	0.614; 95% CI: (0.592;0.635)	0.573; 95% CI: (0.551;0.595)	0.505; 95% CI: (0.514;0.523)	0.612; 95% CI: (0.602;0.621)	0.584; 95% CI: (0.567;0.601)	0.519; 95% CI: (0.505;0.542)	0.518; 95% CI: (0.509;0.545)	0.615; 95% CI: (0.606;0.625)	0.517; 95% CI: (0.517;0.551)
biocarta_role_of_nicotinic_acetylcholine_receptors_in_the_regulation_of_apoptosis_Main_Pathway	0.598; 95% CI: (0.58;0.616)	0.56; 95% CI: (0.544;0.576)	0.548; 95% CI: (0.512;0.583)	0.824; 95% CI: (0.796;0.852)	0.639; 95% CI: (0.629;0.649)	0.605; 95% CI: (0.593;0.618)	0.613; 95% CI: (0.591;0.634)	0.586; 95% CI: (0.563;0.61)	0.534; 95% CI: (0.514;0.555)	0.625; 95% CI: (0.614;0.637)	0.602; 95% CI: (0.583;0.62)	0.552; 95% CI: (0.525;0.579)	0.553; 95% CI: (0.523;0.583)	0.636; 95% CI: (0.625;0.646)	0.513; 95% CI: (0.524;0.549)
biocarta_role_of_pi3k_subunit_p85_in_regulation_of_actin_organization_and_cell_migration_Main_Pathway	0.607; 95% CI: (0.589;0.625)	0.57; 95% CI: (0.556;0.584)	0.549; 95% CI: (0.513;0.584)	0.827; 95% CI: (0.799;0.854)	0.626; 95% CI: (0.617;0.635)	0.594; 95% CI: (0.581;0.606)	0.613; 95% CI: (0.591;0.634)	0.577; 95% CI: (0.554;0.599)	0.523; 95% CI: (0.503;0.542)	0.608; 95% CI: (0.596;0.62)	0.6; 95% CI: (0.585;0.616)	0.514; 95% CI: (0.512;0.54)	0.533; 95% CI: (0.504;0.561)	0.631; 95% CI: (0.623;0.638)	0.506; 95% CI: (0.531;0.543)
biocarta_skeletal_muscle_hypertrophy_is_regulated_via_akt_mtor_Main_Pathway	0.614; 95% CI: (0.595;0.632)	0.522; 95% CI: (0.504;0.541)	0.558; 95% CI: (0.521;0.595)	0.881; 95% CI: (0.856;0.906)	0.665; 95% CI: (0.658;0.672)	0.595; 95% CI: (0.579;0.61)	0.619; 95% CI: (0.597;0.641)	0.585; 95% CI: (0.56;0.611)	0.513; 95% CI: (0.507;0.533)	0.634; 95% CI: (0.621;0.647)	0.614; 95% CI: (0.594;0.633)	0.503; 95% CI: (0.523;0.528)	0.517; 95% CI: (0.512;0.546)	0.657; 95% CI: (0.647;0.667)	0.514; 95% CI: (0.525;0.552)
biocarta_t_cell_receptor_signaling_Main_Pathway	0.629; 95% CI: (0.611;0.647)	0.639; 95% CI: (0.622;0.655)	0.522; 95% CI: (0.516;0.561)	0.759; 95% CI: (0.731;0.787)	0.71; 95% CI: (0.695;0.725)	0.646; 95% CI: (0.63;0.662)	0.716; 95% CI: (0.695;0.737)	0.618; 95% CI: (0.589;0.648)	0.631; 95% CI: (0.609;0.654)	0.675; 95% CI: (0.66;0.691)	0.627; 95% CI: (0.602;0.653)	0.616; 95% CI: (0.585;0.648)	0.542; 95% CI: (0.509;0.575)	0.695; 95% CI: (0.678;0.712)	0.567; 95% CI: (0.523;0.611)
biocarta_the_co_stimulatory_signal_during_t_cell_activation_Main_Pathway	0.61; 95% CI: (0.592;0.628)	0.569; 95% CI: (0.555;0.583)	0.525; 95% CI: (0.508;0.558)	0.811; 95% CI: (0.783;0.838)	0.608; 95% CI: (0.593;0.623)	0.599; 95% CI: (0.587;0.611)	0.613; 95% CI: (0.592;0.635)	0.596; 95% CI: (0.577;0.615)	0.531; 95% CI: (0.511;0.551)	0.604; 95% CI: (0.591;0.616)	0.598; 95% CI: (0.581;0.614)	0.538; 95% CI: (0.511;0.565)	0.521; 95% CI: (0.506;0.549)	0.628; 95% CI: (0.619;0.637)	0.527; 95% CI: (0.507;0.562)
biocarta_the_co_stimulatory_signal_during_t_cell_activation_Pathway_(T_cell_activation)	0.61; 95% CI: (0.592;0.628)	0.569; 95% CI: (0.555;0.583)	0.525; 95% CI: (0.508;0.558)	0.811; 95% CI: (0.783;0.838)	0.608; 95% CI: (0.593;0.623)	0.599; 95% CI: (0.587;0.611)	0.613; 95% CI: (0.592;0.635)	0.596; 95% CI: (0.577;0.615)	0.531; 95% CI: (0.511;0.551)	0.604; 95% CI: (0.591;0.616)	0.598; 95% CI: (0.581;0.614)	0.538; 95% CI: (0.511;0.565)	0.521; 95% CI: (0.506;0.549)	0.628; 95% CI: (0.619;0.637)	0.527; 95% CI: (0.507;0.562)
biocarta_the_igf_1_receptor_and_longevity_Main_Pathway	0.62; 95% CI: (0.601;0.638)	0.566; 95% CI: (0.552;0.581)	0.545; 95% CI: (0.509;0.58)	0.825; 95% CI: (0.798;0.853)	0.626; 95% CI: (0.615;0.638)	0.602; 95% CI: (0.589;0.614)	0.618; 95% CI: (0.596;0.639)	0.591; 95% CI: (0.571;0.611)	0.521; 95% CI: (0.502;0.541)	0.616; 95% CI: (0.604;0.627)	0.586; 95% CI: (0.567;0.606)	0.521; 95% CI: (0.502;0.544)	0.524; 95% CI: (0.503;0.552)	0.605; 95% CI: (0.59;0.619)	0.501; 95% CI: (0.536;0.539)
biocarta_thrombin_signaling_and_protease_activated_receptors_Main_Pathway	0.624; 95% CI: (0.606;0.642)	0.62; 95% CI: (0.605;0.636)	0.525; 95% CI: (0.512;0.561)	0.792; 95% CI: (0.763;0.821)	0.686; 95% CI: (0.676;0.697)	0.637; 95% CI: (0.622;0.651)	0.689; 95% CI: (0.667;0.711)	0.61; 95% CI: (0.583;0.637)	0.597; 95% CI: (0.575;0.62)	0.647; 95% CI: (0.632;0.662)	0.625; 95% CI: (0.604;0.646)	0.58; 95% CI: (0.551;0.61)	0.572; 95% CI: (0.54;0.604)	0.681; 95% CI: (0.67;0.692)	0.502; 95% CI: (0.539;0.543)
biocarta_tpo_signaling_Main_Pathway	0.624; 95% CI: (0.606;0.643)	0.601; 95% CI: (0.586;0.617)	0.536; 95% CI: (0.5;0.573)	0.796; 95% CI: (0.768;0.825)	0.661; 95% CI: (0.649;0.674)	0.62; 95% CI: (0.605;0.634)	0.659; 95% CI: (0.637;0.681)	0.588; 95% CI: (0.561;0.614)	0.572; 95% CI: (0.55;0.593)	0.639; 95% CI: (0.626;0.653)	0.607; 95% CI: (0.585;0.629)	0.542; 95% CI: (0.513;0.571)	0.52; 95% CI: (0.511;0.55)	0.64; 95% CI: (0.624;0.656)	0.51; 95% CI: (0.531;0.551)
biocarta_transcription_factor_creb_and_its_extracellular_signals_Main_Pathway	0.614; 95% CI: (0.596;0.632)	0.588; 95% CI: (0.573;0.602)	0.552; 95% CI: (0.517;0.588)	0.81; 95% CI: (0.783;0.838)	0.649; 95% CI: (0.64;0.657)	0.611; 95% CI: (0.597;0.624)	0.659; 95% CI: (0.637;0.681)	0.597; 95% CI: (0.575;0.619)	0.542; 95% CI: (0.521;0.563)	0.628; 95% CI: (0.615;0.64)	0.608; 95% CI: (0.59;0.626)	0.535; 95% CI: (0.507;0.563)	0.537; 95% CI: (0.507;0.566)	0.646; 95% CI: (0.636;0.655)	0.512; 95% CI: (0.528;0.551)
biocarta_trka_receptor_signaling_Main_Pathway	0.635; 95% CI: (0.617;0.653)	0.579; 95% CI: (0.564;0.594)	0.535; 95% CI: (0.5;0.57)	0.818; 95% CI: (0.791;0.846)	0.643; 95% CI: (0.632;0.655)	0.612; 95% CI: (0.599;0.625)	0.638; 95% CI: (0.616;0.659)	0.606; 95% CI: (0.585;0.627)	0.539; 95% CI: (0.518;0.56)	0.627; 95% CI: (0.615;0.639)	0.598; 95% CI: (0.578;0.619)	0.519; 95% CI: (0.509;0.546)	0.508; 95% CI: (0.52;0.536)	0.625; 95% CI: (0.611;0.64)	0.518; 95% CI: (0.52;0.555)
biocarta_tumor_suppressor_arf_inhibits_ribosomal_biogenesis_Main_Pathway	0.575; 95% CI: (0.556;0.594)	0.503; 95% CI: (0.52;0.526)	0.587; 95% CI: (0.556;0.618)	0.692; 95% CI: (0.668;0.716)	0.714; 95% CI: (0.692;0.736)	0.729; 95% CI: (0.717;0.742)	0.699; 95% CI: (0.678;0.721)	0.565; 95% CI: (0.528;0.603)	0.666; 95% CI: (0.643;0.69)	0.589; 95% CI: (0.569;0.61)	0.685; 95% CI: (0.662;0.708)	0.541; 95% CI: (0.511;0.571)	0.566; 95% CI: (0.534;0.599)	0.758; 95% CI: (0.748;0.767)	0.536; 95% CI: (0.506;0.578)
biocarta_vegf_hypoxia_and_angiogenesis_Main_Pathway	0.606; 95% CI: (0.587;0.624)	0.61; 95% CI: (0.594;0.626)	0.524; 95% CI: (0.512;0.561)	0.789; 95% CI: (0.76;0.818)	0.671; 95% CI: (0.655;0.687)	0.622; 95% CI: (0.606;0.638)	0.656; 95% CI: (0.634;0.678)	0.581; 95% CI: (0.552;0.61)	0.603; 95% CI: (0.581;0.626)	0.645; 95% CI: (0.63;0.66)	0.624; 95% CI: (0.601;0.647)	0.599; 95% CI: (0.569;0.629)	0.532; 95% CI: (0.501;0.564)	0.661; 95% CI: (0.645;0.677)	0.522; 95% CI: (0.521;0.564)
BRCA1_Pathway	0.539; 95% CI: (0.518;0.559)	0.503; 95% CI: (0.521;0.526)	0.628; 95% CI: (0.595;0.662)	0.558; 95% CI: (0.522;0.593)	0.769; 95% CI: (0.745;0.793)	0.695; 95% CI: (0.679;0.711)	0.751; 95% CI: (0.73;0.772)	0.524; 95% CI: (0.514;0.561)	0.703; 95% CI: (0.681;0.724)	0.566; 95% CI: (0.545;0.587)	0.694; 95% CI: (0.668;0.721)	0.508; 95% CI: (0.52;0.536)	0.581; 95% CI: (0.549;0.613)	0.801; 95% CI: (0.789;0.813)	0.539; 95% CI: (0.501;0.58)
cAMP_Pathway	0.566; 95% CI: (0.549;0.582)	0.724; 95% CI: (0.708;0.741)	0.524; 95% CI: (0.512;0.561)	0.668; 95% CI: (0.638;0.698)	0.847; 95% CI: (0.823;0.871)	0.667; 95% CI: (0.65;0.685)	0.791; 95% CI: (0.77;0.811)	0.5; 95% CI: (0.531;0.532)	0.774; 95% CI: (0.757;0.791)	0.721; 95% CI: (0.703;0.74)	0.695; 95% CI: (0.668;0.721)	0.754; 95% CI: (0.727;0.78)	0.644; 95% CI: (0.614;0.675)	0.774; 95% CI: (0.757;0.791)	0.638; 95% CI: (0.599;0.676)
cAMP_Pathway_Metabolic_Energy	0.618; 95% CI: (0.599;0.636)	0.582; 95% CI: (0.566;0.598)	0.519; 95% CI: (0.517;0.556)	0.823; 95% CI: (0.795;0.851)	0.673; 95% CI: (0.666;0.68)	0.623; 95% CI: (0.609;0.637)	0.663; 95% CI: (0.641;0.685)	0.571; 95% CI: (0.542;0.599)	0.568; 95% CI: (0.546;0.589)	0.646; 95% CI: (0.634;0.659)	0.624; 95% CI: (0.605;0.643)	0.536; 95% CI: (0.509;0.563)	0.541; 95% CI: (0.51;0.571)	0.658; 95% CI: (0.646;0.67)	0.516; 95% CI: (0.524;0.557)
cAMP_Pathway_Myocardial_Contraction	0.527; 95% CI: (0.508;0.545)	0.67; 95% CI: (0.653;0.687)	0.501; 95% CI: (0.537;0.539)	0.561; 95% CI: (0.525;0.597)	0.747; 95% CI: (0.727;0.767)	0.654; 95% CI: (0.636;0.673)	0.749; 95% CI: (0.728;0.769)	0.524; 95% CI: (0.513;0.561)	0.731; 95% CI: (0.711;0.752)	0.653; 95% CI: (0.634;0.673)	0.617; 95% CI: (0.589;0.645)	0.755; 95% CI: (0.727;0.783)	0.646; 95% CI: (0.614;0.677)	0.757; 95% CI: (0.742;0.772)	0.591; 95% CI: (0.548;0.634)
Caspase_Cascade_Pathway	0.566; 95% CI: (0.549;0.582)	0.703; 95% CI: (0.685;0.72)	0.524; 95% CI: (0.513;0.56)	0.684; 95% CI: (0.653;0.715)	0.809; 95% CI: (0.781;0.836)	0.665; 95% CI: (0.647;0.684)	0.789; 95% CI: (0.768;0.81)	0.516; 95% CI: (0.517;0.548)	0.753; 95% CI: (0.734;0.771)	0.73; 95% CI: (0.711;0.748)	0.716; 95% CI: (0.69;0.742)	0.737; 95% CI: (0.71;0.763)	0.616; 95% CI: (0.584;0.649)	0.734; 95% CI: (0.716;0.751)	0.616; 95% CI: (0.575;0.658)
CDK5_Signaling_in_Neurons	0.605; 95% CI: (0.587;0.623)	0.615; 95% CI: (0.6;0.63)	0.551; 95% CI: (0.514;0.587)	0.79; 95% CI: (0.762;0.818)	0.674; 95% CI: (0.663;0.685)	0.623; 95% CI: (0.609;0.638)	0.694; 95% CI: (0.672;0.716)	0.586; 95% CI: (0.558;0.614)	0.574; 95% CI: (0.551;0.596)	0.648; 95% CI: (0.635;0.661)	0.619; 95% CI: (0.599;0.64)	0.539; 95% CI: (0.51;0.569)	0.549; 95% CI: (0.518;0.58)	0.644; 95% CI: (0.628;0.66)	0.548; 95% CI: (0.505;0.591)
Cellular_Apoptosis_Pathway	0.554; 95% CI: (0.536;0.573)	0.535; 95% CI: (0.514;0.556)	0.573; 95% CI: (0.538;0.607)	0.666; 95% CI: (0.638;0.694)	0.83; 95% CI: (0.806;0.854)	0.723; 95% CI: (0.707;0.739)	0.776; 95% CI: (0.755;0.797)	0.538; 95% CI: (0.503;0.572)	0.746; 95% CI: (0.726;0.765)	0.537; 95% CI: (0.518;0.557)	0.739; 95% CI: (0.713;0.765)	0.621; 95% CI: (0.59;0.651)	0.622; 95% CI: (0.59;0.655)	0.875; 95% CI: (0.864;0.886)	0.552; 95% CI: (0.511;0.594)
Chemokine_Pathway	0.561; 95% CI: (0.544;0.578)	0.665; 95% CI: (0.647;0.682)	0.511; 95% CI: (0.527;0.549)	0.708; 95% CI: (0.678;0.737)	0.749; 95% CI: (0.72;0.778)	0.676; 95% CI: (0.658;0.694)	0.78; 95% CI: (0.76;0.801)	0.552; 95% CI: (0.518;0.587)	0.723; 95% CI: (0.703;0.743)	0.694; 95% CI: (0.676;0.713)	0.685; 95% CI: (0.658;0.711)	0.716; 95% CI: (0.688;0.745)	0.587; 95% CI: (0.554;0.62)	0.751; 95% CI: (0.731;0.771)	0.598; 95% CI: (0.556;0.64)
CREB_Pathway	0.577; 95% CI: (0.56;0.593)	0.685; 95% CI: (0.667;0.702)	0.524; 95% CI: (0.513;0.561)	0.682; 95% CI: (0.653;0.711)	0.831; 95% CI: (0.811;0.85)	0.648; 95% CI: (0.629;0.666)	0.775; 95% CI: (0.754;0.796)	0.506; 95% CI: (0.527;0.539)	0.747; 95% CI: (0.729;0.766)	0.714; 95% CI: (0.695;0.732)	0.693; 95% CI: (0.666;0.719)	0.735; 95% CI: (0.707;0.764)	0.636; 95% CI: (0.605;0.667)	0.825; 95% CI: (0.808;0.842)	0.632; 95% CI: (0.593;0.67)
Cytoskeleton_Reorganization	0.596; 95% CI: (0.577;0.614)	0.657; 95% CI: (0.639;0.675)	0.522; 95% CI: (0.518;0.562)	0.767; 95% CI: (0.739;0.794)	0.792; 95% CI: (0.773;0.81)	0.648; 95% CI: (0.629;0.668)	0.715; 95% CI: (0.694;0.736)	0.536; 95% CI: (0.502;0.57)	0.704; 95% CI: (0.684;0.725)	0.688; 95% CI: (0.669;0.706)	0.66; 95% CI: (0.632;0.688)	0.707; 95% CI: (0.679;0.735)	0.567; 95% CI: (0.534;0.6)	0.768; 95% CI: (0.75;0.786)	0.574; 95% CI: (0.529;0.618)
D-imyoi-inositol_134-trisphosphate_biosynthesis	0.501; 95% CI: (0.514;0.516)	0.529; 95% CI: (0.513;0.544)	0.509; 95% CI: (0.521;0.538)	0.797; 95% CI: (0.765;0.829)	0.607; 95% CI: (0.597;0.617)	0.564; 95% CI: (0.55;0.577)	0.61; 95% CI: (0.589;0.631)	0.568; 95% CI: (0.547;0.588)	0.545; 95% CI: (0.526;0.565)	0.59; 95% CI: (0.578;0.601)	0.573; 95% CI: (0.556;0.591)	0.572; 95% CI: (0.546;0.599)	0.513; 95% CI: (0.513;0.539)	0.609; 95% CI: (0.6;0.617)	0.5; 95% CI: (0.534;0.535)
EGF_Pathway	0.573; 95% CI: (0.556;0.591)	0.673; 95% CI: (0.655;0.691)	0.509; 95% CI: (0.531;0.549)	0.751; 95% CI: (0.723;0.78)	0.752; 95% CI: (0.722;0.783)	0.7; 95% CI: (0.682;0.718)	0.77; 95% CI: (0.747;0.792)	0.577; 95% CI: (0.544;0.609)	0.689; 95% CI: (0.667;0.71)	0.727; 95% CI: (0.709;0.745)	0.701; 95% CI: (0.675;0.728)	0.698; 95% CI: (0.672;0.725)	0.585; 95% CI: (0.551;0.619)	0.592; 95% CI: (0.572;0.612)	0.538; 95% CI: (0.506;0.583)
EGF_Pathway_Cell_Survival	0.608; 95% CI: (0.589;0.627)	0.521; 95% CI: (0.501;0.541)	0.516; 95% CI: (0.522;0.553)	0.815; 95% CI: (0.786;0.845)	0.689; 95% CI: (0.679;0.699)	0.642; 95% CI: (0.628;0.656)	0.662; 95% CI: (0.64;0.684)	0.596; 95% CI: (0.569;0.623)	0.588; 95% CI: (0.567;0.61)	0.656; 95% CI: (0.643;0.67)	0.633; 95% CI: (0.612;0.654)	0.537; 95% CI: (0.509;0.566)	0.534; 95% CI: (0.503;0.566)	0.682; 95% CI: (0.67;0.693)	0.502; 95% CI: (0.538;0.542)
ErbB_Family_Pathway	0.544; 95% CI: (0.526;0.561)	0.656; 95% CI: (0.638;0.674)	0.508; 95% CI: (0.531;0.547)	0.732; 95% CI: (0.701;0.762)	0.735; 95% CI: (0.705;0.766)	0.67; 95% CI: (0.651;0.688)	0.786; 95% CI: (0.764;0.808)	0.614; 95% CI: (0.58;0.648)	0.691; 95% CI: (0.67;0.713)	0.731; 95% CI: (0.713;0.748)	0.707; 95% CI: (0.682;0.732)	0.704; 95% CI: (0.677;0.731)	0.559; 95% CI: (0.525;0.593)	0.583; 95% CI: (0.562;0.603)	0.52; 95% CI: (0.525;0.566)
ERK_Signaling_Pathway	0.553; 95% CI: (0.535;0.57)	0.618; 95% CI: (0.598;0.637)	0.546; 95% CI: (0.51;0.582)	0.659; 95% CI: (0.629;0.688)	0.838; 95% CI: (0.813;0.863)	0.734; 95% CI: (0.718;0.749)	0.801; 95% CI: (0.78;0.821)	0.507; 95% CI: (0.524;0.538)	0.774; 95% CI: (0.756;0.791)	0.609; 95% CI: (0.59;0.627)	0.743; 95% CI: (0.717;0.768)	0.707; 95% CI: (0.678;0.736)	0.638; 95% CI: (0.608;0.669)	0.836; 95% CI: (0.822;0.85)	0.593; 95% CI: (0.554;0.632)
Erythropoietin_Pathway	0.568; 95% CI: (0.551;0.585)	0.651; 95% CI: (0.634;0.669)	0.517; 95% CI: (0.522;0.556)	0.782; 95% CI: (0.755;0.809)	0.732; 95% CI: (0.703;0.76)	0.659; 95% CI: (0.64;0.677)	0.777; 95% CI: (0.756;0.799)	0.58; 95% CI: (0.548;0.613)	0.685; 95% CI: (0.664;0.707)	0.708; 95% CI: (0.69;0.726)	0.683; 95% CI: (0.657;0.708)	0.672; 95% CI: (0.643;0.702)	0.576; 95% CI: (0.542;0.611)	0.733; 95% CI: (0.712;0.753)	0.58; 95% CI: (0.536;0.623)
Erythropoietin_Pathway_Cell_Survival	0.609; 95% CI: (0.591;0.627)	0.579; 95% CI: (0.56;0.598)	0.549; 95% CI: (0.51;0.588)	0.839; 95% CI: (0.813;0.865)	0.727; 95% CI: (0.711;0.742)	0.648; 95% CI: (0.63;0.665)	0.698; 95% CI: (0.676;0.72)	0.588; 95% CI: (0.557;0.62)	0.61; 95% CI: (0.587;0.632)	0.681; 95% CI: (0.665;0.698)	0.659; 95% CI: (0.636;0.683)	0.633; 95% CI: (0.603;0.662)	0.541; 95% CI: (0.508;0.575)	0.734; 95% CI: (0.722;0.745)	0.53; 95% CI: (0.515;0.575)
Estrogen_Pathway	0.553; 95% CI: (0.536;0.57)	0.705; 95% CI: (0.688;0.723)	0.523; 95% CI: (0.515;0.56)	0.7; 95% CI: (0.67;0.73)	0.782; 95% CI: (0.756;0.809)	0.663; 95% CI: (0.644;0.681)	0.795; 95% CI: (0.774;0.816)	0.507; 95% CI: (0.525;0.538)	0.743; 95% CI: (0.724;0.761)	0.732; 95% CI: (0.714;0.75)	0.726; 95% CI: (0.699;0.752)	0.73; 95% CI: (0.703;0.757)	0.61; 95% CI: (0.577;0.643)	0.718; 95% CI: (0.7;0.736)	0.628; 95% CI: (0.588;0.667)
Estrogen_Pathway_Anti-Apoptosis	0.609; 95% CI: (0.59;0.628)	0.618; 95% CI: (0.602;0.633)	0.525; 95% CI: (0.513;0.562)	0.797; 95% CI: (0.77;0.825)	0.698; 95% CI: (0.687;0.708)	0.625; 95% CI: (0.609;0.641)	0.712; 95% CI: (0.69;0.734)	0.579; 95% CI: (0.549;0.609)	0.592; 95% CI: (0.57;0.614)	0.655; 95% CI: (0.64;0.67)	0.638; 95% CI: (0.617;0.659)	0.569; 95% CI: (0.54;0.599)	0.555; 95% CI: (0.523;0.588)	0.684; 95% CI: (0.672;0.697)	0.528; 95% CI: (0.514;0.569)
Estrogen_Pathway_Gene_Expression_via_FOS_JUN_ELK1_SP1_POLR2B_CREB3_NFKB2	0.603; 95% CI: (0.585;0.621)	0.651; 95% CI: (0.633;0.669)	0.56; 95% CI: (0.52;0.6)	0.75; 95% CI: (0.72;0.78)	0.78; 95% CI: (0.764;0.795)	0.621; 95% CI: (0.602;0.64)	0.738; 95% CI: (0.717;0.759)	0.565; 95% CI: (0.531;0.6)	0.673; 95% CI: (0.652;0.693)	0.672; 95% CI: (0.653;0.69)	0.682; 95% CI: (0.656;0.707)	0.636; 95% CI: (0.605;0.667)	0.559; 95% CI: (0.525;0.594)	0.77; 95% CI: (0.757;0.783)	0.608; 95% CI: (0.563;0.653)
FAK_Pathway	0.618; 95% CI: (0.601;0.636)	0.625; 95% CI: (0.607;0.643)	0.532; 95% CI: (0.508;0.572)	0.822; 95% CI: (0.795;0.849)	0.751; 95% CI: (0.735;0.767)	0.645; 95% CI: (0.627;0.663)	0.705; 95% CI: (0.684;0.727)	0.571; 95% CI: (0.538;0.604)	0.63; 95% CI: (0.608;0.652)	0.692; 95% CI: (0.675;0.709)	0.665; 95% CI: (0.639;0.691)	0.649; 95% CI: (0.619;0.68)	0.563; 95% CI: (0.528;0.597)	0.725; 95% CI: (0.707;0.743)	0.558; 95% CI: (0.514;0.601)
FGFR_Signaling	0.635; 95% CI: (0.617;0.653)	0.629; 95% CI: (0.612;0.646)	0.545; 95% CI: (0.506;0.585)	0.789; 95% CI: (0.762;0.816)	0.693; 95% CI: (0.675;0.712)	0.637; 95% CI: (0.62;0.653)	0.704; 95% CI: (0.683;0.726)	0.589; 95% CI: (0.558;0.619)	0.605; 95% CI: (0.582;0.627)	0.668; 95% CI: (0.652;0.684)	0.649; 95% CI: (0.626;0.673)	0.585; 95% CI: (0.553;0.617)	0.536; 95% CI: (0.503;0.569)	0.691; 95% CI: (0.674;0.708)	0.555; 95% CI: (0.51;0.601)
FLT3_Signaling_Pathway	0.567; 95% CI: (0.548;0.585)	0.686; 95% CI: (0.67;0.703)	0.515; 95% CI: (0.524;0.554)	0.751; 95% CI: (0.72;0.781)	0.633; 95% CI: (0.602;0.665)	0.689; 95% CI: (0.672;0.706)	0.779; 95% CI: (0.757;0.801)	0.625; 95% CI: (0.592;0.658)	0.662; 95% CI: (0.639;0.684)	0.72; 95% CI: (0.703;0.737)	0.683; 95% CI: (0.659;0.708)	0.707; 95% CI: (0.682;0.731)	0.506; 95% CI: (0.529;0.541)	0.529; 95% CI: (0.508;0.549)	0.539; 95% CI: (0.505;0.583)
FLT3_Signaling_Pathway_Transcription_via_ELK3_MAPK12_CREB3_STAT2	0.521; 95% CI: (0.503;0.539)	0.688; 95% CI: (0.676;0.7)	0.506; 95% CI: (0.531;0.544)	0.579; 95% CI: (0.542;0.617)	0.635; 95% CI: (0.606;0.663)	0.638; 95% CI: (0.622;0.654)	0.774; 95% CI: (0.752;0.796)	0.598; 95% CI: (0.569;0.628)	0.651; 95% CI: (0.628;0.674)	0.665; 95% CI: (0.65;0.68)	0.645; 95% CI: (0.624;0.666)	0.736; 95% CI: (0.713;0.758)	0.501; 95% CI: (0.531;0.533)	0.585; 95% CI: (0.564;0.606)	0.546; 95% CI: (0.505;0.587)
FN1_Influence_on_Cell_Motility_via_Integrins	0.605; 95% CI: (0.586;0.624)	0.592; 95% CI: (0.576;0.609)	0.538; 95% CI: (0.5;0.576)	0.803; 95% CI: (0.774;0.832)	0.679; 95% CI: (0.668;0.69)	0.61; 95% CI: (0.594;0.626)	0.66; 95% CI: (0.638;0.682)	0.566; 95% CI: (0.535;0.598)	0.592; 95% CI: (0.57;0.614)	0.648; 95% CI: (0.635;0.662)	0.636; 95% CI: (0.617;0.655)	0.554; 95% CI: (0.525;0.582)	0.559; 95% CI: (0.527;0.591)	0.681; 95% CI: (0.671;0.692)	0.521; 95% CI: (0.522;0.563)
Glucocorticoid_Receptor_Signaling_Pathway	0.546; 95% CI: (0.527;0.565)	0.679; 95% CI: (0.661;0.696)	0.522; 95% CI: (0.519;0.563)	0.606; 95% CI: (0.571;0.641)	0.744; 95% CI: (0.72;0.769)	0.596; 95% CI: (0.577;0.616)	0.754; 95% CI: (0.734;0.774)	0.522; 95% CI: (0.513;0.557)	0.71; 95% CI: (0.689;0.731)	0.664; 95% CI: (0.645;0.684)	0.642; 95% CI: (0.614;0.671)	0.698; 95% CI: (0.668;0.727)	0.572; 95% CI: (0.538;0.605)	0.77; 95% CI: (0.755;0.785)	0.644; 95% CI: (0.603;0.685)
GPCR_Pathway	0.568; 95% CI: (0.551;0.586)	0.71; 95% CI: (0.692;0.727)	0.511; 95% CI: (0.529;0.55)	0.697; 95% CI: (0.668;0.727)	0.775; 95% CI: (0.748;0.803)	0.664; 95% CI: (0.645;0.683)	0.79; 95% CI: (0.769;0.811)	0.545; 95% CI: (0.514;0.577)	0.735; 95% CI: (0.715;0.754)	0.729; 95% CI: (0.711;0.747)	0.724; 95% CI: (0.697;0.75)	0.739; 95% CI: (0.712;0.765)	0.613; 95% CI: (0.581;0.646)	0.711; 95% CI: (0.693;0.73)	0.629; 95% CI: (0.588;0.67)
Growth_Hormone_Signaling_Pathway	0.599; 95% CI: (0.581;0.618)	0.618; 95% CI: (0.6;0.635)	0.557; 95% CI: (0.518;0.596)	0.755; 95% CI: (0.726;0.785)	0.741; 95% CI: (0.726;0.756)	0.649; 95% CI: (0.631;0.666)	0.724; 95% CI: (0.703;0.746)	0.565; 95% CI: (0.532;0.599)	0.655; 95% CI: (0.633;0.677)	0.678; 95% CI: (0.662;0.695)	0.666; 95% CI: (0.643;0.689)	0.652; 95% CI: (0.621;0.682)	0.563; 95% CI: (0.529;0.596)	0.748; 95% CI: (0.737;0.759)	0.546; 95% CI: (0.5;0.592)
Growth_Hormone_Signaling_Pathway_Cell_Survival	0.605; 95% CI: (0.586;0.624)	0.57; 95% CI: (0.553;0.587)	0.537; 95% CI: (0.501;0.576)	0.82; 95% CI: (0.791;0.849)	0.677; 95% CI: (0.669;0.685)	0.624; 95% CI: (0.609;0.638)	0.655; 95% CI: (0.633;0.677)	0.584; 95% CI: (0.557;0.611)	0.57; 95% CI: (0.548;0.591)	0.645; 95% CI: (0.632;0.658)	0.627; 95% CI: (0.608;0.646)	0.57; 95% CI: (0.542;0.598)	0.544; 95% CI: (0.513;0.574)	0.669; 95% CI: (0.658;0.679)	0.506; 95% CI: (0.533;0.545)
Growth_Hormone_Signaling_Pathway_Gene_Expression_via_SRF_ELK1_STAT5B_CEBPD_STAT1_STAT3	0.605; 95% CI: (0.586;0.623)	0.62; 95% CI: (0.602;0.637)	0.558; 95% CI: (0.519;0.597)	0.763; 95% CI: (0.733;0.792)	0.733; 95% CI: (0.718;0.749)	0.648; 95% CI: (0.631;0.665)	0.724; 95% CI: (0.703;0.746)	0.58; 95% CI: (0.547;0.612)	0.645; 95% CI: (0.623;0.667)	0.674; 95% CI: (0.658;0.691)	0.664; 95% CI: (0.641;0.687)	0.64; 95% CI: (0.609;0.671)	0.564; 95% CI: (0.531;0.597)	0.741; 95% CI: (0.73;0.751)	0.547; 95% CI: (0.501;0.593)
Growth_Hormone_Signaling_Pathway_Glucose_Uptake	0.609; 95% CI: (0.59;0.628)	0.573; 95% CI: (0.557;0.59)	0.531; 95% CI: (0.507;0.569)	0.825; 95% CI: (0.795;0.855)	0.669; 95% CI: (0.661;0.678)	0.621; 95% CI: (0.607;0.635)	0.649; 95% CI: (0.627;0.671)	0.581; 95% CI: (0.554;0.608)	0.567; 95% CI: (0.546;0.588)	0.637; 95% CI: (0.624;0.65)	0.624; 95% CI: (0.605;0.643)	0.557; 95% CI: (0.529;0.584)	0.539; 95% CI: (0.509;0.569)	0.662; 95% CI: (0.651;0.672)	0.501; 95% CI: (0.538;0.539)
GSK3_Signaling_Pathway	0.553; 95% CI: (0.536;0.57)	0.71; 95% CI: (0.693;0.727)	0.505; 95% CI: (0.533;0.543)	0.716; 95% CI: (0.687;0.745)	0.8; 95% CI: (0.773;0.827)	0.669; 95% CI: (0.65;0.688)	0.804; 95% CI: (0.784;0.824)	0.527; 95% CI: (0.507;0.561)	0.74; 95% CI: (0.721;0.759)	0.73; 95% CI: (0.712;0.749)	0.7; 95% CI: (0.674;0.727)	0.721; 95% CI: (0.695;0.748)	0.605; 95% CI: (0.571;0.638)	0.7; 95% CI: (0.682;0.718)	0.625; 95% CI: (0.587;0.664)
GSK3_Signaling_Pathway_Gene_Expression_via_CTNNB1	0.529; 95% CI: (0.51;0.548)	0.689; 95% CI: (0.674;0.703)	0.515; 95% CI: (0.523;0.554)	0.645; 95% CI: (0.612;0.678)	0.726; 95% CI: (0.711;0.742)	0.621; 95% CI: (0.603;0.64)	0.788; 95% CI: (0.771;0.806)	0.515; 95% CI: (0.521;0.55)	0.683; 95% CI: (0.661;0.705)	0.657; 95% CI: (0.639;0.674)	0.62; 95% CI: (0.594;0.646)	0.649; 95% CI: (0.62;0.679)	0.588; 95% CI: (0.556;0.62)	0.726; 95% CI: (0.713;0.739)	0.639; 95% CI: (0.595;0.683)
GSK3_Signaling_Pathway_Glycogen_Synthesis	0.507; 95% CI: (0.509;0.523)	0.617; 95% CI: (0.606;0.628)	0.507; 95% CI: (0.526;0.54)	0.57; 95% CI: (0.537;0.603)	0.627; 95% CI: (0.615;0.639)	0.587; 95% CI: (0.573;0.601)	0.815; 95% CI: (0.8;0.831)	0.541; 95% CI: (0.514;0.569)	0.565; 95% CI: (0.543;0.586)	0.601; 95% CI: (0.588;0.615)	0.6; 95% CI: (0.583;0.618)	0.591; 95% CI: (0.562;0.619)	0.524; 95% CI: (0.505;0.552)	0.627; 95% CI: (0.617;0.637)	0.557; 95% CI: (0.513;0.602)
GSK3_Signaling_Pathway_Protein_Synthesis	0.502; 95% CI: (0.514;0.519)	0.615; 95% CI: (0.604;0.626)	0.503; 95% CI: (0.531;0.538)	0.562; 95% CI: (0.529;0.595)	0.628; 95% CI: (0.616;0.64)	0.591; 95% CI: (0.578;0.605)	0.813; 95% CI: (0.797;0.829)	0.538; 95% CI: (0.509;0.566)	0.564; 95% CI: (0.543;0.585)	0.598; 95% CI: (0.584;0.612)	0.6; 95% CI: (0.583;0.617)	0.584; 95% CI: (0.556;0.612)	0.53; 95% CI: (0.501;0.559)	0.63; 95% CI: (0.62;0.639)	0.55; 95% CI: (0.506;0.595)
HGF_Pathway	0.587; 95% CI: (0.57;0.603)	0.659; 95% CI: (0.641;0.676)	0.515; 95% CI: (0.524;0.553)	0.742; 95% CI: (0.713;0.771)	0.718; 95% CI: (0.688;0.748)	0.676; 95% CI: (0.658;0.693)	0.778; 95% CI: (0.757;0.799)	0.581; 95% CI: (0.547;0.615)	0.701; 95% CI: (0.68;0.723)	0.708; 95% CI: (0.691;0.725)	0.69; 95% CI: (0.665;0.716)	0.686; 95% CI: (0.657;0.715)	0.549; 95% CI: (0.515;0.583)	0.711; 95% CI: (0.69;0.733)	0.553; 95% CI: (0.51;0.596)
HGF_Pathway_Anoikis	0.616; 95% CI: (0.598;0.635)	0.598; 95% CI: (0.581;0.614)	0.558; 95% CI: (0.519;0.598)	0.801; 95% CI: (0.773;0.829)	0.685; 95% CI: (0.673;0.697)	0.633; 95% CI: (0.618;0.648)	0.676; 95% CI: (0.654;0.698)	0.568; 95% CI: (0.538;0.598)	0.583; 95% CI: (0.561;0.605)	0.652; 95% CI: (0.638;0.666)	0.626; 95% CI: (0.605;0.647)	0.57; 95% CI: (0.54;0.599)	0.532; 95% CI: (0.501;0.563)	0.679; 95% CI: (0.667;0.691)	0.536; 95% CI: (0.508;0.58)
HGF_Pathway_Cell_Scattering	0.624; 95% CI: (0.605;0.643)	0.581; 95% CI: (0.565;0.597)	0.523; 95% CI: (0.514;0.561)	0.831; 95% CI: (0.802;0.859)	0.675; 95% CI: (0.667;0.682)	0.617; 95% CI: (0.603;0.631)	0.66; 95% CI: (0.638;0.682)	0.585; 95% CI: (0.558;0.611)	0.56; 95% CI: (0.539;0.582)	0.643; 95% CI: (0.631;0.656)	0.625; 95% CI: (0.606;0.645)	0.544; 95% CI: (0.517;0.571)	0.532; 95% CI: (0.502;0.563)	0.662; 95% CI: (0.65;0.673)	0.501; 95% CI: (0.538;0.54)
HGF_Pathway_Cell_Survival	0.624; 95% CI: (0.605;0.643)	0.581; 95% CI: (0.565;0.597)	0.523; 95% CI: (0.514;0.561)	0.831; 95% CI: (0.802;0.859)	0.675; 95% CI: (0.667;0.682)	0.617; 95% CI: (0.603;0.631)	0.66; 95% CI: (0.638;0.682)	0.585; 95% CI: (0.558;0.611)	0.56; 95% CI: (0.539;0.582)	0.643; 95% CI: (0.631;0.656)	0.625; 95% CI: (0.606;0.645)	0.544; 95% CI: (0.517;0.571)	0.532; 95% CI: (0.502;0.563)	0.662; 95% CI: (0.65;0.673)	0.501; 95% CI: (0.538;0.54)
HIF1Alpha_Pathway	0.505; 95% CI: (0.516;0.525)	0.525; 95% CI: (0.502;0.548)	0.611; 95% CI: (0.58;0.642)	0.546; 95% CI: (0.511;0.58)	0.726; 95% CI: (0.704;0.749)	0.603; 95% CI: (0.585;0.621)	0.723; 95% CI: (0.702;0.744)	0.558; 95% CI: (0.52;0.596)	0.688; 95% CI: (0.665;0.711)	0.574; 95% CI: (0.554;0.594)	0.677; 95% CI: (0.653;0.702)	0.504; 95% CI: (0.526;0.534)	0.561; 95% CI: (0.528;0.594)	0.771; 95% CI: (0.762;0.781)	0.511; 95% CI: (0.529;0.551)
HIF1Alpha_Pathway_p53_Hypoxia_Pathway	0.503; 95% CI: (0.517;0.524)	0.515; 95% CI: (0.508;0.538)	0.619; 95% CI: (0.589;0.648)	0.54; 95% CI: (0.507;0.573)	0.703; 95% CI: (0.681;0.726)	0.589; 95% CI: (0.571;0.607)	0.703; 95% CI: (0.681;0.724)	0.557; 95% CI: (0.519;0.594)	0.685; 95% CI: (0.662;0.708)	0.59; 95% CI: (0.57;0.61)	0.667; 95% CI: (0.643;0.69)	0.536; 95% CI: (0.507;0.566)	0.551; 95% CI: (0.519;0.584)	0.753; 95% CI: (0.744;0.762)	0.503; 95% CI: (0.537;0.543)
HMGB1_signaling_through_RAGE	0.571; 95% CI: (0.553;0.588)	0.624; 95% CI: (0.609;0.639)	0.55; 95% CI: (0.513;0.587)	0.794; 95% CI: (0.768;0.82)	0.658; 95% CI: (0.637;0.68)	0.632; 95% CI: (0.616;0.647)	0.751; 95% CI: (0.729;0.773)	0.572; 95% CI: (0.541;0.602)	0.629; 95% CI: (0.606;0.652)	0.661; 95% CI: (0.648;0.675)	0.639; 95% CI: (0.619;0.659)	0.533; 95% CI: (0.504;0.561)	0.547; 95% CI: (0.515;0.578)	0.682; 95% CI: (0.671;0.694)	0.511; 95% CI: (0.532;0.554)
IGF1R_Signaling_Pathway	0.557; 95% CI: (0.539;0.574)	0.696; 95% CI: (0.679;0.713)	0.536; 95% CI: (0.503;0.575)	0.733; 95% CI: (0.704;0.762)	0.755; 95% CI: (0.725;0.785)	0.668; 95% CI: (0.649;0.687)	0.782; 95% CI: (0.76;0.804)	0.58; 95% CI: (0.546;0.613)	0.706; 95% CI: (0.684;0.727)	0.727; 95% CI: (0.708;0.745)	0.701; 95% CI: (0.675;0.728)	0.711; 95% CI: (0.686;0.737)	0.563; 95% CI: (0.527;0.6)	0.614; 95% CI: (0.595;0.634)	0.564; 95% CI: (0.518;0.609)
IL-10_Pathway	0.609; 95% CI: (0.59;0.628)	0.6; 95% CI: (0.583;0.617)	0.537; 95% CI: (0.502;0.576)	0.796; 95% CI: (0.767;0.826)	0.699; 95% CI: (0.689;0.709)	0.634; 95% CI: (0.618;0.649)	0.657; 95% CI: (0.635;0.679)	0.567; 95% CI: (0.535;0.598)	0.614; 95% CI: (0.591;0.636)	0.652; 95% CI: (0.637;0.667)	0.63; 95% CI: (0.609;0.652)	0.611; 95% CI: (0.581;0.64)	0.544; 95% CI: (0.513;0.575)	0.694; 95% CI: (0.683;0.705)	0.526; 95% CI: (0.517;0.568)
IL-10_Pathway_IL-10_Responsive_Genes_Transcription_of_BCLXL_Cyclin-D1_D2_D3_Pim1_c-Myc_and_P19(INK4D)_via_STAT3	0.618; 95% CI: (0.599;0.637)	0.583; 95% CI: (0.566;0.599)	0.536; 95% CI: (0.502;0.574)	0.815; 95% CI: (0.785;0.844)	0.679; 95% CI: (0.672;0.686)	0.623; 95% CI: (0.608;0.637)	0.648; 95% CI: (0.626;0.671)	0.571; 95% CI: (0.543;0.599)	0.566; 95% CI: (0.544;0.587)	0.64; 95% CI: (0.626;0.653)	0.614; 95% CI: (0.593;0.635)	0.563; 95% CI: (0.535;0.592)	0.535; 95% CI: (0.504;0.565)	0.673; 95% CI: (0.664;0.683)	0.537; 95% CI: (0.505;0.579)
IL-10_Pathway_Inflammatory_Cytokine_Genes_Expression_via_STAT3	0.618; 95% CI: (0.599;0.637)	0.583; 95% CI: (0.566;0.599)	0.536; 95% CI: (0.502;0.574)	0.815; 95% CI: (0.785;0.844)	0.679; 95% CI: (0.672;0.686)	0.623; 95% CI: (0.608;0.637)	0.648; 95% CI: (0.626;0.671)	0.571; 95% CI: (0.543;0.599)	0.566; 95% CI: (0.544;0.587)	0.64; 95% CI: (0.626;0.653)	0.614; 95% CI: (0.593;0.635)	0.563; 95% CI: (0.535;0.592)	0.535; 95% CI: (0.504;0.565)	0.673; 95% CI: (0.664;0.683)	0.537; 95% CI: (0.505;0.579)
IL-2_Pathway	0.575; 95% CI: (0.557;0.592)	0.675; 95% CI: (0.658;0.692)	0.532; 95% CI: (0.507;0.571)	0.731; 95% CI: (0.7;0.762)	0.713; 95% CI: (0.684;0.742)	0.639; 95% CI: (0.62;0.658)	0.777; 95% CI: (0.756;0.798)	0.599; 95% CI: (0.567;0.63)	0.703; 95% CI: (0.683;0.724)	0.705; 95% CI: (0.688;0.722)	0.693; 95% CI: (0.669;0.718)	0.675; 95% CI: (0.646;0.704)	0.562; 95% CI: (0.526;0.597)	0.713; 95% CI: (0.692;0.734)	0.55; 95% CI: (0.505;0.595)
IL-2_Pathway_Apoptosis_Inhibition	0.617; 95% CI: (0.598;0.636)	0.57; 95% CI: (0.553;0.586)	0.525; 95% CI: (0.512;0.563)	0.831; 95% CI: (0.802;0.86)	0.668; 95% CI: (0.66;0.675)	0.622; 95% CI: (0.608;0.635)	0.652; 95% CI: (0.63;0.674)	0.574; 95% CI: (0.547;0.601)	0.552; 95% CI: (0.531;0.573)	0.634; 95% CI: (0.621;0.647)	0.614; 95% CI: (0.594;0.633)	0.541; 95% CI: (0.514;0.568)	0.532; 95% CI: (0.503;0.562)	0.662; 95% CI: (0.652;0.672)	0.5; 95% CI: (0.538;0.538)
IL-6_Pathway	0.553; 95% CI: (0.535;0.571)	0.689; 95% CI: (0.671;0.707)	0.508; 95% CI: (0.531;0.547)	0.731; 95% CI: (0.702;0.759)	0.726; 95% CI: (0.695;0.757)	0.676; 95% CI: (0.658;0.694)	0.774; 95% CI: (0.753;0.795)	0.562; 95% CI: (0.528;0.596)	0.708; 95% CI: (0.687;0.729)	0.712; 95% CI: (0.693;0.731)	0.704; 95% CI: (0.677;0.731)	0.723; 95% CI: (0.697;0.749)	0.562; 95% CI: (0.528;0.597)	0.61; 95% CI: (0.591;0.629)	0.528; 95% CI: (0.518;0.575)
ILK_Signaling_Pathway	0.571; 95% CI: (0.554;0.587)	0.677; 95% CI: (0.661;0.694)	0.532; 95% CI: (0.504;0.567)	0.713; 95% CI: (0.687;0.74)	0.863; 95% CI: (0.846;0.881)	0.651; 95% CI: (0.634;0.669)	0.778; 95% CI: (0.757;0.799)	0.523; 95% CI: (0.507;0.553)	0.766; 95% CI: (0.748;0.784)	0.719; 95% CI: (0.702;0.736)	0.702; 95% CI: (0.676;0.727)	0.75; 95% CI: (0.723;0.777)	0.642; 95% CI: (0.612;0.672)	0.88; 95% CI: (0.867;0.893)	0.64; 95% CI: (0.602;0.678)
ILK_Signaling_Pathway_Cell_Cycle_Proliferation	0.593; 95% CI: (0.574;0.611)	0.566; 95% CI: (0.547;0.586)	0.523; 95% CI: (0.516;0.563)	0.846; 95% CI: (0.819;0.874)	0.749; 95% CI: (0.738;0.759)	0.647; 95% CI: (0.63;0.664)	0.687; 95% CI: (0.666;0.709)	0.573; 95% CI: (0.54;0.606)	0.635; 95% CI: (0.613;0.658)	0.687; 95% CI: (0.671;0.702)	0.663; 95% CI: (0.639;0.686)	0.644; 95% CI: (0.615;0.673)	0.537; 95% CI: (0.504;0.57)	0.732; 95% CI: (0.719;0.746)	0.532; 95% CI: (0.511;0.575)
ILK_Signaling_Pathway_Cell_Migration_Retraction	0.593; 95% CI: (0.575;0.612)	0.567; 95% CI: (0.548;0.587)	0.524; 95% CI: (0.515;0.564)	0.846; 95% CI: (0.819;0.874)	0.748; 95% CI: (0.738;0.759)	0.646; 95% CI: (0.629;0.663)	0.688; 95% CI: (0.666;0.709)	0.576; 95% CI: (0.543;0.609)	0.636; 95% CI: (0.614;0.659)	0.687; 95% CI: (0.672;0.703)	0.664; 95% CI: (0.641;0.687)	0.644; 95% CI: (0.615;0.673)	0.536; 95% CI: (0.503;0.57)	0.732; 95% CI: (0.718;0.745)	0.53; 95% CI: (0.512;0.573)
ILK_Signaling_Pathway_Cytoskeletal_Adhesion_Complexes	0.545; 95% CI: (0.527;0.563)	0.681; 95% CI: (0.663;0.699)	0.502; 95% CI: (0.536;0.54)	0.563; 95% CI: (0.527;0.599)	0.807; 95% CI: (0.786;0.827)	0.632; 95% CI: (0.613;0.65)	0.774; 95% CI: (0.753;0.794)	0.51; 95% CI: (0.524;0.545)	0.768; 95% CI: (0.75;0.786)	0.681; 95% CI: (0.662;0.7)	0.659; 95% CI: (0.632;0.686)	0.762; 95% CI: (0.734;0.79)	0.606; 95% CI: (0.574;0.638)	0.795; 95% CI: (0.778;0.812)	0.603; 95% CI: (0.563;0.642)
ILK_Signaling_Pathway_Epithelial_Mesenchymal_Transition_Tubulo-Interstitial_Fibrosis	0.576; 95% CI: (0.559;0.593)	0.632; 95% CI: (0.614;0.651)	0.508; 95% CI: (0.53;0.546)	0.77; 95% CI: (0.742;0.798)	0.841; 95% CI: (0.824;0.857)	0.664; 95% CI: (0.646;0.681)	0.758; 95% CI: (0.738;0.779)	0.55; 95% CI: (0.517;0.583)	0.743; 95% CI: (0.725;0.762)	0.717; 95% CI: (0.699;0.735)	0.691; 95% CI: (0.664;0.717)	0.738; 95% CI: (0.709;0.766)	0.593; 95% CI: (0.561;0.625)	0.824; 95% CI: (0.808;0.839)	0.581; 95% CI: (0.542;0.621)
ILK_Signaling_Pathway_G2_Phase_Arrest	0.593; 95% CI: (0.574;0.611)	0.566; 95% CI: (0.547;0.586)	0.523; 95% CI: (0.516;0.563)	0.846; 95% CI: (0.819;0.874)	0.749; 95% CI: (0.738;0.759)	0.647; 95% CI: (0.63;0.664)	0.687; 95% CI: (0.666;0.709)	0.573; 95% CI: (0.54;0.606)	0.635; 95% CI: (0.613;0.658)	0.687; 95% CI: (0.671;0.702)	0.663; 95% CI: (0.639;0.686)	0.644; 95% CI: (0.615;0.673)	0.537; 95% CI: (0.504;0.57)	0.732; 95% CI: (0.719;0.746)	0.532; 95% CI: (0.511;0.575)
ILK_Signaling_Pathway_Migration_Vasculogenesis	0.576; 95% CI: (0.559;0.593)	0.632; 95% CI: (0.614;0.651)	0.508; 95% CI: (0.53;0.546)	0.77; 95% CI: (0.742;0.798)	0.841; 95% CI: (0.824;0.857)	0.664; 95% CI: (0.646;0.681)	0.758; 95% CI: (0.738;0.779)	0.55; 95% CI: (0.517;0.583)	0.743; 95% CI: (0.725;0.762)	0.717; 95% CI: (0.699;0.735)	0.691; 95% CI: (0.664;0.717)	0.738; 95% CI: (0.709;0.766)	0.593; 95% CI: (0.561;0.625)	0.824; 95% CI: (0.808;0.839)	0.581; 95% CI: (0.542;0.621)
Integrin-based_Cell_Migration_and_Adhesion	0.54; 95% CI: (0.521;0.559)	0.661; 95% CI: (0.644;0.678)	0.51; 95% CI: (0.53;0.551)	0.571; 95% CI: (0.535;0.607)	0.75; 95% CI: (0.733;0.768)	0.614; 95% CI: (0.595;0.634)	0.725; 95% CI: (0.704;0.745)	0.554; 95% CI: (0.52;0.589)	0.733; 95% CI: (0.713;0.753)	0.637; 95% CI: (0.617;0.656)	0.647; 95% CI: (0.62;0.674)	0.742; 95% CI: (0.714;0.769)	0.58; 95% CI: (0.548;0.612)	0.755; 95% CI: (0.742;0.768)	0.588; 95% CI: (0.543;0.632)
Integrins_Function_in_Carcinoma_Progression	0.601; 95% CI: (0.582;0.62)	0.591; 95% CI: (0.571;0.611)	0.537; 95% CI: (0.502;0.577)	0.787; 95% CI: (0.758;0.815)	0.762; 95% CI: (0.748;0.775)	0.64; 95% CI: (0.622;0.658)	0.694; 95% CI: (0.671;0.716)	0.579; 95% CI: (0.547;0.612)	0.658; 95% CI: (0.636;0.68)	0.685; 95% CI: (0.668;0.702)	0.658; 95% CI: (0.632;0.683)	0.628; 95% CI: (0.597;0.658)	0.575; 95% CI: (0.54;0.609)	0.753; 95% CI: (0.74;0.767)	0.576; 95% CI: (0.533;0.619)
Interferon_Pathway	0.601; 95% CI: (0.583;0.619)	0.639; 95% CI: (0.621;0.657)	0.547; 95% CI: (0.508;0.587)	0.751; 95% CI: (0.721;0.781)	0.751; 95% CI: (0.734;0.769)	0.63; 95% CI: (0.611;0.648)	0.69; 95% CI: (0.669;0.712)	0.542; 95% CI: (0.506;0.579)	0.674; 95% CI: (0.652;0.696)	0.653; 95% CI: (0.634;0.673)	0.65; 95% CI: (0.624;0.677)	0.65; 95% CI: (0.62;0.681)	0.538; 95% CI: (0.502;0.573)	0.755; 95% CI: (0.742;0.768)	0.59; 95% CI: (0.544;0.637)
Interferon_Pathway_Transciption	0.612; 95% CI: (0.593;0.631)	0.58; 95% CI: (0.563;0.597)	0.546; 95% CI: (0.507;0.585)	0.816; 95% CI: (0.786;0.846)	0.681; 95% CI: (0.672;0.689)	0.602; 95% CI: (0.586;0.618)	0.646; 95% CI: (0.623;0.668)	0.583; 95% CI: (0.555;0.611)	0.573; 95% CI: (0.551;0.594)	0.64; 95% CI: (0.627;0.654)	0.627; 95% CI: (0.607;0.646)	0.541; 95% CI: (0.514;0.568)	0.541; 95% CI: (0.51;0.572)	0.671; 95% CI: (0.661;0.682)	0.524; 95% CI: (0.517;0.565)
IP3_Pathway	0.581; 95% CI: (0.564;0.598)	0.639; 95% CI: (0.621;0.657)	0.51; 95% CI: (0.528;0.549)	0.74; 95% CI: (0.712;0.769)	0.809; 95% CI: (0.791;0.826)	0.663; 95% CI: (0.644;0.681)	0.753; 95% CI: (0.732;0.775)	0.529; 95% CI: (0.505;0.563)	0.718; 95% CI: (0.698;0.737)	0.705; 95% CI: (0.687;0.723)	0.68; 95% CI: (0.652;0.708)	0.71; 95% CI: (0.68;0.74)	0.595; 95% CI: (0.561;0.629)	0.787; 95% CI: (0.769;0.805)	0.579; 95% CI: (0.534;0.624)
JAK-STAT_Pathway	0.556; 95% CI: (0.539;0.574)	0.686; 95% CI: (0.669;0.703)	0.518; 95% CI: (0.52;0.555)	0.706; 95% CI: (0.676;0.735)	0.739; 95% CI: (0.712;0.766)	0.66; 95% CI: (0.641;0.678)	0.79; 95% CI: (0.77;0.811)	0.532; 95% CI: (0.5;0.564)	0.744; 95% CI: (0.724;0.763)	0.709; 95% CI: (0.69;0.727)	0.694; 95% CI: (0.668;0.72)	0.722; 95% CI: (0.693;0.751)	0.603; 95% CI: (0.57;0.636)	0.792; 95% CI: (0.773;0.811)	0.614; 95% CI: (0.575;0.653)
JAK-STAT_Pathway_Akt_Pathway	0.626; 95% CI: (0.607;0.645)	0.586; 95% CI: (0.57;0.602)	0.526; 95% CI: (0.512;0.564)	0.828; 95% CI: (0.8;0.857)	0.675; 95% CI: (0.666;0.685)	0.622; 95% CI: (0.608;0.636)	0.665; 95% CI: (0.643;0.687)	0.575; 95% CI: (0.547;0.603)	0.568; 95% CI: (0.547;0.59)	0.648; 95% CI: (0.636;0.661)	0.624; 95% CI: (0.605;0.644)	0.533; 95% CI: (0.506;0.56)	0.539; 95% CI: (0.509;0.57)	0.665; 95% CI: (0.654;0.677)	0.503; 95% CI: (0.537;0.542)
JAK-STAT_Pathway_Nml_SOCS_BCL-XL_p21_Myc_Nos2_Gene_Expression_via_STAT2	0.551; 95% CI: (0.533;0.57)	0.664; 95% CI: (0.646;0.681)	0.514; 95% CI: (0.524;0.552)	0.59; 95% CI: (0.553;0.627)	0.728; 95% CI: (0.704;0.751)	0.631; 95% CI: (0.612;0.651)	0.759; 95% CI: (0.738;0.779)	0.507; 95% CI: (0.526;0.54)	0.731; 95% CI: (0.712;0.751)	0.676; 95% CI: (0.657;0.695)	0.674; 95% CI: (0.648;0.701)	0.729; 95% CI: (0.7;0.758)	0.609; 95% CI: (0.576;0.642)	0.806; 95% CI: (0.791;0.82)	0.63; 95% CI: (0.589;0.671)
JNK_Pathway	0.552; 95% CI: (0.534;0.57)	0.586; 95% CI: (0.565;0.607)	0.591; 95% CI: (0.555;0.626)	0.676; 95% CI: (0.647;0.705)	0.778; 95% CI: (0.752;0.805)	0.746; 95% CI: (0.73;0.761)	0.807; 95% CI: (0.787;0.827)	0.534; 95% CI: (0.5;0.567)	0.749; 95% CI: (0.73;0.768)	0.562; 95% CI: (0.543;0.581)	0.732; 95% CI: (0.706;0.759)	0.643; 95% CI: (0.613;0.674)	0.629; 95% CI: (0.598;0.659)	0.836; 95% CI: (0.821;0.852)	0.561; 95% CI: (0.523;0.6)
JNK_Pathway_Gene_Expression_Apoptosis_Inflammation_Tumorigenesis_Cell_Migration_via_SMAD4_STAT4_HSF1_TP53_MAP2_DCX_ATF2_NFATC3_SPIRE1_MAP1B_TCF15_ELK1_BCL2_JUN_PXN_NFATC2	0.542; 95% CI: (0.523;0.562)	0.535; 95% CI: (0.512;0.559)	0.619; 95% CI: (0.587;0.651)	0.545; 95% CI: (0.511;0.58)	0.722; 95% CI: (0.699;0.744)	0.72; 95% CI: (0.706;0.734)	0.761; 95% CI: (0.74;0.781)	0.53; 95% CI: (0.508;0.568)	0.7; 95% CI: (0.678;0.721)	0.581; 95% CI: (0.561;0.601)	0.678; 95% CI: (0.653;0.702)	0.503; 95% CI: (0.524;0.531)	0.588; 95% CI: (0.557;0.62)	0.763; 95% CI: (0.753;0.774)	0.501; 95% CI: (0.54;0.542)
KEGG_Acute_myeloid_leukemia_Main_Pathway	0.548; 95% CI: (0.529;0.566)	0.692; 95% CI: (0.676;0.707)	0.5; 95% CI: (0.539;0.539)	0.76; 95% CI: (0.731;0.79)	0.551; 95% CI: (0.517;0.586)	0.688; 95% CI: (0.672;0.705)	0.766; 95% CI: (0.744;0.789)	0.632; 95% CI: (0.599;0.664)	0.642; 95% CI: (0.619;0.666)	0.713; 95% CI: (0.698;0.729)	0.676; 95% CI: (0.652;0.7)	0.702; 95% CI: (0.678;0.726)	0.52; 95% CI: (0.515;0.555)	0.511; 95% CI: (0.51;0.532)	0.555; 95% CI: (0.511;0.599)
KEGG_Adrenergic_signaling_in_cardiomyocytes_Main_Pathway	0.596; 95% CI: (0.579;0.613)	0.698; 95% CI: (0.681;0.715)	0.548; 95% CI: (0.511;0.585)	0.716; 95% CI: (0.688;0.743)	0.804; 95% CI: (0.786;0.822)	0.664; 95% CI: (0.646;0.683)	0.751; 95% CI: (0.73;0.772)	0.518; 95% CI: (0.516;0.553)	0.728; 95% CI: (0.709;0.748)	0.692; 95% CI: (0.674;0.711)	0.641; 95% CI: (0.614;0.668)	0.709; 95% CI: (0.68;0.738)	0.607; 95% CI: (0.573;0.64)	0.793; 95% CI: (0.778;0.808)	0.589; 95% CI: (0.544;0.633)
KEGG_Alcoholism_Main_Pathway	0.55; 95% CI: (0.533;0.568)	0.686; 95% CI: (0.672;0.699)	0.527; 95% CI: (0.511;0.565)	0.578; 95% CI: (0.541;0.616)	0.653; 95% CI: (0.626;0.681)	0.647; 95% CI: (0.631;0.664)	0.77; 95% CI: (0.749;0.791)	0.569; 95% CI: (0.536;0.601)	0.673; 95% CI: (0.651;0.696)	0.669; 95% CI: (0.652;0.685)	0.657; 95% CI: (0.634;0.679)	0.763; 95% CI: (0.741;0.784)	0.536; 95% CI: (0.503;0.57)	0.558; 95% CI: (0.538;0.578)	0.547; 95% CI: (0.502;0.593)
KEGG_Aldosterone_regulated_sodium_reabsorption_Main_Pathway	0.558; 95% CI: (0.54;0.576)	0.593; 95% CI: (0.577;0.609)	0.523; 95% CI: (0.513;0.559)	0.806; 95% CI: (0.778;0.834)	0.655; 95% CI: (0.635;0.675)	0.639; 95% CI: (0.625;0.653)	0.745; 95% CI: (0.723;0.768)	0.593; 95% CI: (0.566;0.621)	0.628; 95% CI: (0.605;0.65)	0.648; 95% CI: (0.635;0.662)	0.631; 95% CI: (0.612;0.65)	0.53; 95% CI: (0.503;0.557)	0.55; 95% CI: (0.519;0.58)	0.676; 95% CI: (0.666;0.687)	0.533; 95% CI: (0.504;0.569)
KEGG_AMPK_signaling_Main_Pathway	0.606; 95% CI: (0.588;0.624)	0.645; 95% CI: (0.628;0.663)	0.527; 95% CI: (0.513;0.567)	0.754; 95% CI: (0.724;0.785)	0.76; 95% CI: (0.744;0.775)	0.629; 95% CI: (0.611;0.648)	0.716; 95% CI: (0.695;0.738)	0.545; 95% CI: (0.511;0.58)	0.672; 95% CI: (0.65;0.694)	0.682; 95% CI: (0.665;0.7)	0.664; 95% CI: (0.639;0.688)	0.636; 95% CI: (0.605;0.667)	0.576; 95% CI: (0.542;0.611)	0.749; 95% CI: (0.735;0.763)	0.583; 95% CI: (0.54;0.626)
KEGG_Axon_guidance_Main_Pathway	0.508; 95% CI: (0.509;0.526)	0.691; 95% CI: (0.675;0.706)	0.512; 95% CI: (0.526;0.55)	0.606; 95% CI: (0.57;0.643)	0.703; 95% CI: (0.675;0.731)	0.644; 95% CI: (0.626;0.661)	0.794; 95% CI: (0.774;0.814)	0.538; 95% CI: (0.503;0.573)	0.74; 95% CI: (0.72;0.759)	0.675; 95% CI: (0.657;0.693)	0.666; 95% CI: (0.642;0.691)	0.727; 95% CI: (0.7;0.755)	0.62; 95% CI: (0.588;0.653)	0.695; 95% CI: (0.673;0.716)	0.566; 95% CI: (0.524;0.608)
KEGG_B_cell_receptor_signaling_Main_Pathway	0.566; 95% CI: (0.549;0.584)	0.658; 95% CI: (0.642;0.674)	0.523; 95% CI: (0.514;0.56)	0.758; 95% CI: (0.729;0.788)	0.682; 95% CI: (0.655;0.709)	0.666; 95% CI: (0.65;0.682)	0.776; 95% CI: (0.755;0.797)	0.602; 95% CI: (0.571;0.633)	0.665; 95% CI: (0.643;0.687)	0.682; 95% CI: (0.666;0.698)	0.654; 95% CI: (0.631;0.677)	0.663; 95% CI: (0.633;0.692)	0.53; 95% CI: (0.504;0.563)	0.663; 95% CI: (0.643;0.684)	0.514; 95% CI: (0.528;0.556)
KEGG_Bacterial_invasion_of_epithelial_cells_Main_Pathway	0.587; 95% CI: (0.568;0.605)	0.64; 95% CI: (0.624;0.656)	0.512; 95% CI: (0.527;0.551)	0.807; 95% CI: (0.78;0.835)	0.718; 95% CI: (0.705;0.731)	0.627; 95% CI: (0.609;0.644)	0.694; 95% CI: (0.672;0.715)	0.506; 95% CI: (0.527;0.539)	0.63; 95% CI: (0.608;0.652)	0.662; 95% CI: (0.645;0.678)	0.65; 95% CI: (0.628;0.672)	0.636; 95% CI: (0.606;0.666)	0.56; 95% CI: (0.526;0.594)	0.716; 95% CI: (0.704;0.729)	0.571; 95% CI: (0.526;0.616)
KEGG_cAMP_signaling_Main_Pathway	0.57; 95% CI: (0.552;0.587)	0.717; 95% CI: (0.699;0.734)	0.53; 95% CI: (0.509;0.569)	0.687; 95% CI: (0.657;0.717)	0.837; 95% CI: (0.818;0.856)	0.661; 95% CI: (0.642;0.68)	0.752; 95% CI: (0.731;0.774)	0.53; 95% CI: (0.504;0.564)	0.736; 95% CI: (0.717;0.755)	0.716; 95% CI: (0.697;0.735)	0.674; 95% CI: (0.648;0.7)	0.761; 95% CI: (0.735;0.788)	0.633; 95% CI: (0.6;0.665)	0.712; 95% CI: (0.696;0.728)	0.625; 95% CI: (0.584;0.666)
KEGG_Cell_cycle_Main_Pathway	0.521; 95% CI: (0.501;0.542)	0.506; 95% CI: (0.517;0.529)	0.614; 95% CI: (0.58;0.648)	0.58; 95% CI: (0.547;0.614)	0.748; 95% CI: (0.723;0.774)	0.707; 95% CI: (0.691;0.723)	0.759; 95% CI: (0.739;0.779)	0.547; 95% CI: (0.508;0.585)	0.718; 95% CI: (0.697;0.74)	0.547; 95% CI: (0.527;0.567)	0.695; 95% CI: (0.668;0.722)	0.539; 95% CI: (0.51;0.568)	0.592; 95% CI: (0.56;0.624)	0.816; 95% CI: (0.805;0.827)	0.552; 95% CI: (0.513;0.592)
KEGG_Central_carbon_metabolism_in_cancer_Main_Pathway	0.531; 95% CI: (0.511;0.55)	0.524; 95% CI: (0.502;0.545)	0.621; 95% CI: (0.588;0.655)	0.745; 95% CI: (0.723;0.768)	0.692; 95% CI: (0.664;0.72)	0.767; 95% CI: (0.753;0.782)	0.779; 95% CI: (0.759;0.8)	0.588; 95% CI: (0.549;0.626)	0.715; 95% CI: (0.695;0.736)	0.504; 95% CI: (0.517;0.524)	0.745; 95% CI: (0.72;0.77)	0.542; 95% CI: (0.514;0.57)	0.571; 95% CI: (0.537;0.605)	0.791; 95% CI: (0.774;0.808)	0.537; 95% CI: (0.506;0.579)
KEGG_cGMP_PKG_signaling_Main_Pathway	0.589; 95% CI: (0.572;0.607)	0.693; 95% CI: (0.676;0.71)	0.532; 95% CI: (0.506;0.571)	0.715; 95% CI: (0.685;0.744)	0.796; 95% CI: (0.777;0.815)	0.658; 95% CI: (0.64;0.677)	0.74; 95% CI: (0.719;0.761)	0.54; 95% CI: (0.506;0.575)	0.71; 95% CI: (0.689;0.73)	0.687; 95% CI: (0.668;0.705)	0.668; 95% CI: (0.642;0.694)	0.725; 95% CI: (0.697;0.754)	0.648; 95% CI: (0.615;0.68)	0.788; 95% CI: (0.773;0.802)	0.626; 95% CI: (0.584;0.668)
KEGG_Chemokine_signaling_Main_Pathway	0.544; 95% CI: (0.526;0.561)	0.69; 95% CI: (0.671;0.708)	0.503; 95% CI: (0.537;0.542)	0.706; 95% CI: (0.675;0.738)	0.761; 95% CI: (0.731;0.791)	0.678; 95% CI: (0.659;0.697)	0.779; 95% CI: (0.758;0.799)	0.56; 95% CI: (0.524;0.595)	0.713; 95% CI: (0.692;0.733)	0.711; 95% CI: (0.692;0.73)	0.686; 95% CI: (0.659;0.713)	0.731; 95% CI: (0.705;0.757)	0.573; 95% CI: (0.539;0.607)	0.617; 95% CI: (0.597;0.636)	0.572; 95% CI: (0.528;0.615)
KEGG_Choline_metabolism_in_cancer_Main_Pathway	0.545; 95% CI: (0.528;0.563)	0.588; 95% CI: (0.57;0.606)	0.521; 95% CI: (0.517;0.559)	0.763; 95% CI: (0.734;0.792)	0.683; 95% CI: (0.655;0.711)	0.675; 95% CI: (0.659;0.691)	0.767; 95% CI: (0.746;0.789)	0.582; 95% CI: (0.549;0.614)	0.666; 95% CI: (0.645;0.688)	0.697; 95% CI: (0.682;0.713)	0.673; 95% CI: (0.65;0.696)	0.641; 95% CI: (0.611;0.671)	0.532; 95% CI: (0.503;0.566)	0.675; 95% CI: (0.654;0.696)	0.517; 95% CI: (0.526;0.559)
KEGG_Cholinergic_synapse_Main_Pathway	0.552; 95% CI: (0.535;0.57)	0.68; 95% CI: (0.664;0.696)	0.515; 95% CI: (0.523;0.552)	0.738; 95% CI: (0.708;0.768)	0.689; 95% CI: (0.661;0.717)	0.662; 95% CI: (0.644;0.679)	0.783; 95% CI: (0.763;0.804)	0.571; 95% CI: (0.538;0.603)	0.687; 95% CI: (0.665;0.709)	0.697; 95% CI: (0.681;0.714)	0.658; 95% CI: (0.633;0.682)	0.679; 95% CI: (0.651;0.707)	0.578; 95% CI: (0.545;0.611)	0.684; 95% CI: (0.663;0.705)	0.543; 95% CI: (0.5;0.586)
KEGG_Chronic_myeloid_leukemia_Main_Pathway	0.545; 95% CI: (0.525;0.564)	0.567; 95% CI: (0.543;0.591)	0.611; 95% CI: (0.578;0.645)	0.692; 95% CI: (0.667;0.718)	0.731; 95% CI: (0.702;0.76)	0.778; 95% CI: (0.764;0.792)	0.778; 95% CI: (0.757;0.799)	0.598; 95% CI: (0.557;0.638)	0.718; 95% CI: (0.696;0.739)	0.515; 95% CI: (0.506;0.536)	0.736; 95% CI: (0.711;0.762)	0.567; 95% CI: (0.54;0.594)	0.562; 95% CI: (0.529;0.596)	0.649; 95% CI: (0.632;0.665)	0.542; 95% CI: (0.501;0.585)
KEGG_Circadian_entrainment_Main_Pathway	0.552; 95% CI: (0.534;0.57)	0.683; 95% CI: (0.666;0.699)	0.515; 95% CI: (0.524;0.553)	0.568; 95% CI: (0.532;0.604)	0.777; 95% CI: (0.76;0.795)	0.632; 95% CI: (0.613;0.651)	0.747; 95% CI: (0.726;0.768)	0.509; 95% CI: (0.526;0.545)	0.747; 95% CI: (0.728;0.765)	0.681; 95% CI: (0.662;0.7)	0.623; 95% CI: (0.596;0.65)	0.748; 95% CI: (0.72;0.776)	0.616; 95% CI: (0.583;0.648)	0.78; 95% CI: (0.766;0.793)	0.608; 95% CI: (0.565;0.651)
KEGG_Colorectal_cancer_Main_Pathway	0.541; 95% CI: (0.523;0.559)	0.661; 95% CI: (0.645;0.676)	0.523; 95% CI: (0.517;0.562)	0.802; 95% CI: (0.774;0.83)	0.698; 95% CI: (0.675;0.721)	0.685; 95% CI: (0.67;0.7)	0.751; 95% CI: (0.728;0.773)	0.551; 95% CI: (0.519;0.582)	0.625; 95% CI: (0.602;0.648)	0.702; 95% CI: (0.688;0.716)	0.666; 95% CI: (0.645;0.688)	0.653; 95% CI: (0.627;0.679)	0.557; 95% CI: (0.524;0.591)	0.513; 95% CI: (0.507;0.533)	0.5; 95% CI: (0.543;0.544)
KEGG_Dopaminergic_synapse_Main_Pathway	0.562; 95% CI: (0.544;0.58)	0.688; 95% CI: (0.672;0.704)	0.505; 95% CI: (0.536;0.545)	0.589; 95% CI: (0.554;0.624)	0.756; 95% CI: (0.738;0.773)	0.624; 95% CI: (0.605;0.643)	0.752; 95% CI: (0.731;0.773)	0.504; 95% CI: (0.531;0.539)	0.716; 95% CI: (0.696;0.737)	0.668; 95% CI: (0.65;0.687)	0.639; 95% CI: (0.612;0.667)	0.719; 95% CI: (0.69;0.748)	0.589; 95% CI: (0.555;0.623)	0.753; 95% CI: (0.739;0.767)	0.622; 95% CI: (0.578;0.666)
KEGG_Drug_metabolism_cytochrome_P450_Main_Pathway	0.515; 95% CI: (0.501;0.531)	0.579; 95% CI: (0.566;0.593)	0.518; 95% CI: (0.513;0.55)	0.535; 95% CI: (0.504;0.567)	0.632; 95% CI: (0.623;0.642)	0.583; 95% CI: (0.569;0.597)	0.61; 95% CI: (0.589;0.632)	0.549; 95% CI: (0.523;0.576)	0.649; 95% CI: (0.627;0.671)	0.588; 95% CI: (0.574;0.603)	0.566; 95% CI: (0.544;0.588)	0.752; 95% CI: (0.723;0.78)	0.513; 95% CI: (0.515;0.54)	0.627; 95% CI: (0.616;0.637)	0.572; 95% CI: (0.531;0.613)
KEGG_ECM_receptor_interaction_Main_Pathway	0.533; 95% CI: (0.515;0.552)	0.679; 95% CI: (0.662;0.697)	0.533; 95% CI: (0.506;0.573)	0.562; 95% CI: (0.526;0.598)	0.8; 95% CI: (0.784;0.816)	0.624; 95% CI: (0.605;0.643)	0.762; 95% CI: (0.742;0.782)	0.509; 95% CI: (0.527;0.544)	0.765; 95% CI: (0.746;0.784)	0.657; 95% CI: (0.637;0.676)	0.661; 95% CI: (0.634;0.688)	0.747; 95% CI: (0.718;0.776)	0.604; 95% CI: (0.572;0.636)	0.771; 95% CI: (0.755;0.787)	0.62; 95% CI: (0.58;0.659)
KEGG_Endometrial_cancer_Main_Pathway	0.522; 95% CI: (0.504;0.541)	0.597; 95% CI: (0.579;0.616)	0.508; 95% CI: (0.531;0.546)	0.772; 95% CI: (0.742;0.802)	0.676; 95% CI: (0.648;0.705)	0.7; 95% CI: (0.685;0.714)	0.747; 95% CI: (0.724;0.77)	0.647; 95% CI: (0.619;0.675)	0.637; 95% CI: (0.614;0.66)	0.707; 95% CI: (0.693;0.722)	0.671; 95% CI: (0.648;0.693)	0.68; 95% CI: (0.655;0.705)	0.511; 95% CI: (0.522;0.545)	0.538; 95% CI: (0.517;0.559)	0.564; 95% CI: (0.523;0.606)
KEGG_Epstein_Barr_virus_infection_Main_Pathway	0.617; 95% CI: (0.599;0.635)	0.613; 95% CI: (0.596;0.63)	0.531; 95% CI: (0.507;0.57)	0.777; 95% CI: (0.748;0.806)	0.707; 95% CI: (0.693;0.72)	0.632; 95% CI: (0.616;0.649)	0.696; 95% CI: (0.674;0.718)	0.584; 95% CI: (0.553;0.615)	0.618; 95% CI: (0.595;0.64)	0.661; 95% CI: (0.645;0.676)	0.629; 95% CI: (0.606;0.651)	0.571; 95% CI: (0.54;0.602)	0.551; 95% CI: (0.518;0.584)	0.698; 95% CI: (0.687;0.71)	0.557; 95% CI: (0.512;0.602)
KEGG_ErbB_signaling_Main_Pathway	0.553; 95% CI: (0.535;0.571)	0.67; 95% CI: (0.652;0.688)	0.518; 95% CI: (0.521;0.557)	0.734; 95% CI: (0.705;0.764)	0.729; 95% CI: (0.699;0.759)	0.687; 95% CI: (0.669;0.704)	0.788; 95% CI: (0.767;0.809)	0.611; 95% CI: (0.577;0.645)	0.684; 95% CI: (0.662;0.706)	0.73; 95% CI: (0.713;0.747)	0.692; 95% CI: (0.666;0.717)	0.7; 95% CI: (0.674;0.727)	0.563; 95% CI: (0.529;0.598)	0.573; 95% CI: (0.552;0.593)	0.534; 95% CI: (0.51;0.579)
KEGG_Estrogen_signaling_Main_Pathway	0.556; 95% CI: (0.538;0.573)	0.655; 95% CI: (0.638;0.673)	0.504; 95% CI: (0.535;0.542)	0.741; 95% CI: (0.712;0.769)	0.72; 95% CI: (0.691;0.748)	0.675; 95% CI: (0.658;0.693)	0.788; 95% CI: (0.767;0.809)	0.581; 95% CI: (0.547;0.614)	0.712; 95% CI: (0.692;0.731)	0.701; 95% CI: (0.684;0.718)	0.683; 95% CI: (0.658;0.709)	0.683; 95% CI: (0.654;0.711)	0.571; 95% CI: (0.537;0.605)	0.708; 95% CI: (0.687;0.729)	0.551; 95% CI: (0.511;0.592)
KEGG_Fc_epsilon_RI_signaling_Main_Pathway	0.58; 95% CI: (0.562;0.597)	0.657; 95% CI: (0.641;0.673)	0.518; 95% CI: (0.52;0.556)	0.75; 95% CI: (0.721;0.78)	0.68; 95% CI: (0.652;0.708)	0.658; 95% CI: (0.641;0.675)	0.775; 95% CI: (0.754;0.796)	0.595; 95% CI: (0.564;0.626)	0.669; 95% CI: (0.647;0.691)	0.693; 95% CI: (0.677;0.708)	0.656; 95% CI: (0.633;0.679)	0.647; 95% CI: (0.617;0.678)	0.534; 95% CI: (0.5;0.568)	0.676; 95% CI: (0.656;0.697)	0.504; 95% CI: (0.54;0.548)
KEGG_Fc_gamma_R_mediated_phagocytosis_Main_Pathway	0.617; 95% CI: (0.599;0.635)	0.654; 95% CI: (0.637;0.671)	0.521; 95% CI: (0.518;0.561)	0.744; 95% CI: (0.715;0.773)	0.748; 95% CI: (0.731;0.764)	0.646; 95% CI: (0.628;0.664)	0.734; 95% CI: (0.713;0.755)	0.564; 95% CI: (0.529;0.599)	0.66; 95% CI: (0.638;0.682)	0.681; 95% CI: (0.664;0.698)	0.629; 95% CI: (0.603;0.655)	0.664; 95% CI: (0.633;0.695)	0.558; 95% CI: (0.524;0.591)	0.755; 95% CI: (0.743;0.768)	0.559; 95% CI: (0.515;0.604)
KEGG_Focal_adhesion_Main_Pathway	0.571; 95% CI: (0.554;0.589)	0.661; 95% CI: (0.643;0.68)	0.502; 95% CI: (0.536;0.54)	0.756; 95% CI: (0.728;0.783)	0.87; 95% CI: (0.853;0.888)	0.661; 95% CI: (0.642;0.68)	0.75; 95% CI: (0.728;0.771)	0.537; 95% CI: (0.501;0.572)	0.74; 95% CI: (0.721;0.759)	0.746; 95% CI: (0.728;0.763)	0.696; 95% CI: (0.668;0.724)	0.737; 95% CI: (0.709;0.764)	0.592; 95% CI: (0.558;0.625)	0.71; 95% CI: (0.691;0.729)	0.621; 95% CI: (0.584;0.657)
KEGG_FoxO_signaling_Main_Pathway	0.533; 95% CI: (0.515;0.551)	0.619; 95% CI: (0.6;0.638)	0.511; 95% CI: (0.529;0.552)	0.788; 95% CI: (0.76;0.817)	0.749; 95% CI: (0.72;0.778)	0.694; 95% CI: (0.676;0.713)	0.761; 95% CI: (0.739;0.783)	0.607; 95% CI: (0.572;0.641)	0.703; 95% CI: (0.683;0.724)	0.731; 95% CI: (0.714;0.749)	0.69; 95% CI: (0.665;0.715)	0.701; 95% CI: (0.675;0.727)	0.537; 95% CI: (0.502;0.572)	0.586; 95% CI: (0.566;0.606)	0.54; 95% CI: (0.504;0.585)
KEGG_Gap_junction_Main_Pathway	0.531; 95% CI: (0.513;0.548)	0.613; 95% CI: (0.597;0.63)	0.517; 95% CI: (0.519;0.552)	0.579; 95% CI: (0.541;0.617)	0.647; 95% CI: (0.619;0.675)	0.639; 95% CI: (0.622;0.655)	0.783; 95% CI: (0.762;0.804)	0.574; 95% CI: (0.542;0.606)	0.71; 95% CI: (0.689;0.731)	0.65; 95% CI: (0.633;0.667)	0.645; 95% CI: (0.622;0.668)	0.691; 95% CI: (0.663;0.72)	0.568; 95% CI: (0.535;0.601)	0.658; 95% CI: (0.637;0.678)	0.515; 95% CI: (0.526;0.556)
KEGG_Glioma_Main_Pathway	0.545; 95% CI: (0.527;0.564)	0.604; 95% CI: (0.585;0.624)	0.518; 95% CI: (0.521;0.556)	0.806; 95% CI: (0.779;0.833)	0.716; 95% CI: (0.687;0.745)	0.694; 95% CI: (0.677;0.711)	0.762; 95% CI: (0.739;0.784)	0.635; 95% CI: (0.603;0.667)	0.659; 95% CI: (0.637;0.681)	0.733; 95% CI: (0.718;0.749)	0.688; 95% CI: (0.663;0.712)	0.697; 95% CI: (0.671;0.722)	0.515; 95% CI: (0.52;0.55)	0.533; 95% CI: (0.513;0.554)	0.548; 95% CI: (0.504;0.591)
KEGG_GnRH_signaling_Main_Pathway	0.512; 95% CI: (0.506;0.53)	0.639; 95% CI: (0.622;0.656)	0.513; 95% CI: (0.525;0.551)	0.583; 95% CI: (0.545;0.621)	0.683; 95% CI: (0.654;0.712)	0.642; 95% CI: (0.624;0.659)	0.785; 95% CI: (0.765;0.806)	0.561; 95% CI: (0.528;0.594)	0.72; 95% CI: (0.7;0.74)	0.659; 95% CI: (0.641;0.678)	0.67; 95% CI: (0.646;0.694)	0.7; 95% CI: (0.671;0.728)	0.547; 95% CI: (0.513;0.58)	0.679; 95% CI: (0.658;0.701)	0.543; 95% CI: (0.502;0.585)
KEGG_Hepatitis_B_Main_Pathway	0.519; 95% CI: (0.502;0.536)	0.667; 95% CI: (0.653;0.681)	0.537; 95% CI: (0.5;0.573)	0.59; 95% CI: (0.553;0.628)	0.652; 95% CI: (0.624;0.679)	0.641; 95% CI: (0.625;0.657)	0.784; 95% CI: (0.763;0.805)	0.558; 95% CI: (0.526;0.589)	0.674; 95% CI: (0.651;0.696)	0.653; 95% CI: (0.636;0.669)	0.639; 95% CI: (0.617;0.662)	0.66; 95% CI: (0.63;0.689)	0.548; 95% CI: (0.515;0.58)	0.634; 95% CI: (0.614;0.655)	0.58; 95% CI: (0.539;0.621)
KEGG_Hepatitis_C_Main_Pathway	0.568; 95% CI: (0.551;0.585)	0.609; 95% CI: (0.592;0.625)	0.52; 95% CI: (0.518;0.559)	0.569; 95% CI: (0.531;0.607)	0.646; 95% CI: (0.618;0.674)	0.657; 95% CI: (0.642;0.672)	0.763; 95% CI: (0.741;0.785)	0.6; 95% CI: (0.57;0.63)	0.659; 95% CI: (0.637;0.682)	0.666; 95% CI: (0.651;0.681)	0.657; 95% CI: (0.637;0.678)	0.731; 95% CI: (0.708;0.754)	0.506; 95% CI: (0.526;0.539)	0.583; 95% CI: (0.562;0.604)	0.525; 95% CI: (0.52;0.57)
KEGG_HIF_1_signaling_Main_Pathway	0.583; 95% CI: (0.565;0.601)	0.604; 95% CI: (0.585;0.623)	0.501; 95% CI: (0.537;0.539)	0.743; 95% CI: (0.714;0.773)	0.758; 95% CI: (0.74;0.776)	0.525; 95% CI: (0.502;0.548)	0.691; 95% CI: (0.669;0.714)	0.572; 95% CI: (0.537;0.607)	0.656; 95% CI: (0.634;0.679)	0.7; 95% CI: (0.683;0.717)	0.656; 95% CI: (0.63;0.682)	0.637; 95% CI: (0.606;0.668)	0.548; 95% CI: (0.513;0.582)	0.77; 95% CI: (0.757;0.783)	0.514; 95% CI: (0.531;0.56)
KEGG_Hippo_signaling_Main_Pathway	0.505; 95% CI: (0.514;0.523)	0.68; 95% CI: (0.665;0.695)	0.501; 95% CI: (0.539;0.541)	0.649; 95% CI: (0.617;0.681)	0.743; 95% CI: (0.728;0.757)	0.614; 95% CI: (0.595;0.633)	0.791; 95% CI: (0.774;0.809)	0.518; 95% CI: (0.517;0.553)	0.692; 95% CI: (0.671;0.713)	0.635; 95% CI: (0.616;0.653)	0.619; 95% CI: (0.591;0.646)	0.658; 95% CI: (0.629;0.688)	0.607; 95% CI: (0.573;0.64)	0.731; 95% CI: (0.717;0.744)	0.573; 95% CI: (0.529;0.617)
KEGG_HTLV_I_infection_Main_Pathway	0.576; 95% CI: (0.558;0.595)	0.501; 95% CI: (0.522;0.524)	0.615; 95% CI: (0.581;0.649)	0.701; 95% CI: (0.678;0.725)	0.805; 95% CI: (0.782;0.828)	0.755; 95% CI: (0.74;0.769)	0.77; 95% CI: (0.75;0.79)	0.536; 95% CI: (0.501;0.574)	0.692; 95% CI: (0.67;0.713)	0.525; 95% CI: (0.503;0.546)	0.703; 95% CI: (0.675;0.73)	0.503; 95% CI: (0.526;0.531)	0.613; 95% CI: (0.582;0.644)	0.825; 95% CI: (0.813;0.837)	0.512; 95% CI: (0.53;0.554)
KEGG_Inflammatory_mediator_regulation_of_TRP_channels_Main_Pathway	0.602; 95% CI: (0.585;0.62)	0.655; 95% CI: (0.637;0.673)	0.505; 95% CI: (0.534;0.545)	0.74; 95% CI: (0.711;0.768)	0.765; 95% CI: (0.747;0.783)	0.636; 95% CI: (0.616;0.655)	0.729; 95% CI: (0.708;0.75)	0.549; 95% CI: (0.514;0.584)	0.688; 95% CI: (0.667;0.71)	0.679; 95% CI: (0.661;0.697)	0.671; 95% CI: (0.646;0.697)	0.673; 95% CI: (0.642;0.703)	0.583; 95% CI: (0.55;0.616)	0.773; 95% CI: (0.76;0.785)	0.591; 95% CI: (0.546;0.637)
KEGG_Influenza_A_Main_Pathway	0.607; 95% CI: (0.588;0.626)	0.614; 95% CI: (0.596;0.632)	0.544; 95% CI: (0.504;0.584)	0.771; 95% CI: (0.741;0.8)	0.722; 95% CI: (0.707;0.737)	0.619; 95% CI: (0.601;0.637)	0.687; 95% CI: (0.665;0.709)	0.58; 95% CI: (0.547;0.612)	0.628; 95% CI: (0.606;0.65)	0.669; 95% CI: (0.653;0.685)	0.644; 95% CI: (0.622;0.667)	0.586; 95% CI: (0.555;0.616)	0.575; 95% CI: (0.541;0.608)	0.715; 95% CI: (0.703;0.728)	0.587; 95% CI: (0.542;0.633)
KEGG_Inositol_phosphate_metabolism_Main_Pathway	0.601; 95% CI: (0.582;0.619)	0.6; 95% CI: (0.582;0.618)	0.523; 95% CI: (0.516;0.562)	0.79; 95% CI: (0.762;0.818)	0.747; 95% CI: (0.734;0.761)	0.648; 95% CI: (0.63;0.665)	0.706; 95% CI: (0.684;0.728)	0.572; 95% CI: (0.539;0.606)	0.651; 95% CI: (0.629;0.674)	0.696; 95% CI: (0.68;0.712)	0.652; 95% CI: (0.627;0.677)	0.674; 95% CI: (0.644;0.704)	0.544; 95% CI: (0.509;0.579)	0.751; 95% CI: (0.739;0.762)	0.575; 95% CI: (0.532;0.619)
KEGG_Insulin_signaling_Main_Pathway	0.545; 95% CI: (0.526;0.563)	0.674; 95% CI: (0.657;0.691)	0.52; 95% CI: (0.52;0.559)	0.764; 95% CI: (0.734;0.793)	0.699; 95% CI: (0.668;0.73)	0.677; 95% CI: (0.659;0.695)	0.766; 95% CI: (0.744;0.789)	0.611; 95% CI: (0.578;0.643)	0.655; 95% CI: (0.632;0.678)	0.712; 95% CI: (0.696;0.729)	0.685; 95% CI: (0.66;0.709)	0.696; 95% CI: (0.671;0.72)	0.523; 95% CI: (0.512;0.559)	0.515; 95% CI: (0.506;0.536)	0.52; 95% CI: (0.526;0.566)
KEGG_Jak_STAT_signaling_Main_Pathway	0.584; 95% CI: (0.566;0.602)	0.659; 95% CI: (0.641;0.677)	0.539; 95% CI: (0.5;0.579)	0.746; 95% CI: (0.718;0.773)	0.76; 95% CI: (0.743;0.778)	0.651; 95% CI: (0.633;0.67)	0.711; 95% CI: (0.69;0.732)	0.544; 95% CI: (0.507;0.58)	0.702; 95% CI: (0.681;0.724)	0.662; 95% CI: (0.643;0.682)	0.662; 95% CI: (0.636;0.688)	0.7; 95% CI: (0.67;0.73)	0.56; 95% CI: (0.525;0.594)	0.761; 95% CI: (0.747;0.775)	0.594; 95% CI: (0.551;0.636)
KEGG_Leukocyte_transendothelial_migration_Main_Pathway	0.577; 95% CI: (0.559;0.596)	0.655; 95% CI: (0.638;0.672)	0.534; 95% CI: (0.504;0.572)	0.767; 95% CI: (0.739;0.794)	0.736; 95% CI: (0.719;0.754)	0.641; 95% CI: (0.623;0.659)	0.711; 95% CI: (0.689;0.732)	0.518; 95% CI: (0.515;0.552)	0.69; 95% CI: (0.668;0.713)	0.667; 95% CI: (0.65;0.685)	0.64; 95% CI: (0.615;0.665)	0.646; 95% CI: (0.614;0.677)	0.566; 95% CI: (0.532;0.6)	0.747; 95% CI: (0.735;0.76)	0.578; 95% CI: (0.536;0.62)
KEGG_Long_term_depression_Main_Pathway	0.511; 95% CI: (0.507;0.529)	0.709; 95% CI: (0.694;0.724)	0.534; 95% CI: (0.504;0.573)	0.601; 95% CI: (0.564;0.638)	0.697; 95% CI: (0.668;0.726)	0.668; 95% CI: (0.651;0.685)	0.785; 95% CI: (0.763;0.806)	0.548; 95% CI: (0.513;0.583)	0.708; 95% CI: (0.687;0.729)	0.698; 95% CI: (0.681;0.715)	0.673; 95% CI: (0.648;0.698)	0.775; 95% CI: (0.753;0.797)	0.542; 95% CI: (0.507;0.577)	0.515; 95% CI: (0.506;0.535)	0.541; 95% CI: (0.5;0.582)
KEGG_Long_term_potentiation_Main_Pathway	0.505; 95% CI: (0.514;0.523)	0.716; 95% CI: (0.702;0.731)	0.521; 95% CI: (0.517;0.56)	0.583; 95% CI: (0.545;0.622)	0.704; 95% CI: (0.675;0.732)	0.667; 95% CI: (0.649;0.684)	0.786; 95% CI: (0.766;0.807)	0.565; 95% CI: (0.531;0.598)	0.716; 95% CI: (0.695;0.737)	0.699; 95% CI: (0.682;0.716)	0.668; 95% CI: (0.643;0.693)	0.771; 95% CI: (0.749;0.794)	0.566; 95% CI: (0.532;0.6)	0.502; 95% CI: (0.518;0.523)	0.545; 95% CI: (0.502;0.587)
KEGG_MAPK_signaling_Main_Pathway	0.533; 95% CI: (0.514;0.551)	0.585; 95% CI: (0.563;0.607)	0.591; 95% CI: (0.553;0.628)	0.618; 95% CI: (0.584;0.652)	0.804; 95% CI: (0.775;0.832)	0.742; 95% CI: (0.726;0.759)	0.802; 95% CI: (0.782;0.822)	0.543; 95% CI: (0.508;0.579)	0.755; 95% CI: (0.737;0.774)	0.556; 95% CI: (0.537;0.575)	0.744; 95% CI: (0.717;0.771)	0.656; 95% CI: (0.627;0.684)	0.622; 95% CI: (0.59;0.654)	0.754; 95% CI: (0.739;0.769)	0.541; 95% CI: (0.501;0.583)
KEGG_Melanogenesis_Main_Pathway	0.562; 95% CI: (0.55;0.574)	0.603; 95% CI: (0.594;0.612)	0.525; 95% CI: (0.503;0.552)	0.597; 95% CI: (0.565;0.63)	0.533; 95% CI: (0.508;0.559)	0.595; 95% CI: (0.584;0.605)	0.751; 95% CI: (0.73;0.772)	0.562; 95% CI: (0.541;0.584)	0.605; 95% CI: (0.584;0.627)	0.588; 95% CI: (0.576;0.599)	0.594; 95% CI: (0.581;0.607)	0.615; 95% CI: (0.588;0.642)	0.518; 95% CI: (0.508;0.544)	0.546; 95% CI: (0.528;0.564)	0.53; 95% CI: (0.501;0.561)
KEGG_Melanoma_Main_Pathway	0.519; 95% CI: (0.501;0.537)	0.627; 95% CI: (0.609;0.645)	0.518; 95% CI: (0.52;0.555)	0.749; 95% CI: (0.72;0.777)	0.706; 95% CI: (0.679;0.733)	0.693; 95% CI: (0.677;0.71)	0.78; 95% CI: (0.758;0.802)	0.64; 95% CI: (0.608;0.672)	0.665; 95% CI: (0.642;0.687)	0.721; 95% CI: (0.706;0.737)	0.691; 95% CI: (0.668;0.714)	0.709; 95% CI: (0.683;0.734)	0.553; 95% CI: (0.518;0.588)	0.509; 95% CI: (0.511;0.53)	0.52; 95% CI: (0.523;0.563)
KEGG_MicroRNAs_in_cancer_Main_Pathway	0.506; 95% CI: (0.515;0.526)	0.524; 95% CI: (0.502;0.546)	0.625; 95% CI: (0.592;0.658)	0.674; 95% CI: (0.647;0.7)	0.707; 95% CI: (0.677;0.737)	0.741; 95% CI: (0.725;0.756)	0.782; 95% CI: (0.761;0.802)	0.577; 95% CI: (0.539;0.615)	0.739; 95% CI: (0.72;0.759)	0.51; 95% CI: (0.51;0.53)	0.715; 95% CI: (0.689;0.741)	0.585; 95% CI: (0.556;0.613)	0.576; 95% CI: (0.543;0.609)	0.788; 95% CI: (0.772;0.804)	0.508; 95% CI: (0.531;0.546)
KEGG_mTOR_signaling_Main_Pathway	0.596; 95% CI: (0.577;0.614)	0.639; 95% CI: (0.622;0.657)	0.539; 95% CI: (0.5;0.578)	0.774; 95% CI: (0.745;0.803)	0.735; 95% CI: (0.718;0.752)	0.656; 95% CI: (0.639;0.673)	0.679; 95% CI: (0.656;0.702)	0.598; 95% CI: (0.564;0.632)	0.653; 95% CI: (0.63;0.676)	0.712; 95% CI: (0.698;0.727)	0.664; 95% CI: (0.639;0.689)	0.668; 95% CI: (0.64;0.697)	0.53; 95% CI: (0.504;0.565)	0.543; 95% CI: (0.523;0.562)	0.528; 95% CI: (0.518;0.575)
KEGG_Natural_killer_cell_mediated_cytotoxicity_Main_Pathway	0.548; 95% CI: (0.529;0.566)	0.661; 95% CI: (0.643;0.679)	0.516; 95% CI: (0.525;0.557)	0.716; 95% CI: (0.686;0.747)	0.714; 95% CI: (0.685;0.742)	0.691; 95% CI: (0.673;0.708)	0.767; 95% CI: (0.746;0.789)	0.601; 95% CI: (0.568;0.635)	0.697; 95% CI: (0.674;0.719)	0.716; 95% CI: (0.699;0.733)	0.677; 95% CI: (0.651;0.703)	0.714; 95% CI: (0.688;0.74)	0.529; 95% CI: (0.506;0.565)	0.571; 95% CI: (0.552;0.591)	0.535; 95% CI: (0.508;0.579)
KEGG_Neuroactive_ligand_receptor_interaction_Main_Pathway	0.524; 95% CI: (0.506;0.542)	0.67; 95% CI: (0.652;0.688)	0.515; 95% CI: (0.524;0.554)	0.586; 95% CI: (0.549;0.622)	0.798; 95% CI: (0.779;0.817)	0.647; 95% CI: (0.629;0.665)	0.763; 95% CI: (0.743;0.783)	0.507; 95% CI: (0.527;0.54)	0.773; 95% CI: (0.754;0.792)	0.645; 95% CI: (0.625;0.665)	0.642; 95% CI: (0.615;0.669)	0.783; 95% CI: (0.756;0.809)	0.664; 95% CI: (0.634;0.694)	0.816; 95% CI: (0.803;0.83)	0.65; 95% CI: (0.614;0.686)
KEGG_Neurotrophin_signaling_Main_Pathway	0.552; 95% CI: (0.533;0.571)	0.58; 95% CI: (0.557;0.604)	0.596; 95% CI: (0.56;0.631)	0.688; 95% CI: (0.661;0.715)	0.756; 95% CI: (0.727;0.785)	0.772; 95% CI: (0.757;0.788)	0.796; 95% CI: (0.776;0.816)	0.58; 95% CI: (0.542;0.619)	0.723; 95% CI: (0.703;0.743)	0.523; 95% CI: (0.502;0.543)	0.743; 95% CI: (0.718;0.769)	0.587; 95% CI: (0.56;0.614)	0.598; 95% CI: (0.565;0.63)	0.697; 95% CI: (0.681;0.714)	0.506; 95% CI: (0.538;0.55)
KEGG_Nicotine_addiction_Main_Pathway	0.511; 95% CI: (0.506;0.529)	0.63; 95% CI: (0.614;0.646)	0.53; 95% CI: (0.507;0.566)	0.534; 95% CI: (0.501;0.569)	0.699; 95% CI: (0.685;0.714)	0.639; 95% CI: (0.624;0.655)	0.73; 95% CI: (0.709;0.751)	0.526; 95% CI: (0.508;0.56)	0.734; 95% CI: (0.713;0.755)	0.633; 95% CI: (0.615;0.65)	0.625; 95% CI: (0.601;0.649)	0.766; 95% CI: (0.74;0.791)	0.583; 95% CI: (0.551;0.615)	0.706; 95% CI: (0.695;0.718)	0.549; 95% CI: (0.507;0.591)
KEGG_Non_small_cell_lung_cancer_Main_Pathway	0.542; 95% CI: (0.524;0.56)	0.612; 95% CI: (0.594;0.631)	0.501; 95% CI: (0.537;0.54)	0.758; 95% CI: (0.727;0.788)	0.698; 95% CI: (0.669;0.727)	0.709; 95% CI: (0.694;0.724)	0.761; 95% CI: (0.739;0.784)	0.646; 95% CI: (0.615;0.676)	0.664; 95% CI: (0.642;0.686)	0.718; 95% CI: (0.702;0.733)	0.672; 95% CI: (0.648;0.697)	0.688; 95% CI: (0.663;0.713)	0.518; 95% CI: (0.516;0.552)	0.5; 95% CI: (0.521;0.521)	0.553; 95% CI: (0.511;0.596)
KEGG_Olfactory_transduction_Main_Pathway	0.577; 95% CI: (0.559;0.595)	0.617; 95% CI: (0.598;0.636)	0.536; 95% CI: (0.504;0.576)	0.619; 95% CI: (0.585;0.653)	0.806; 95% CI: (0.788;0.824)	0.65; 95% CI: (0.631;0.669)	0.649; 95% CI: (0.628;0.67)	0.519; 95% CI: (0.515;0.552)	0.821; 95% CI: (0.803;0.839)	0.622; 95% CI: (0.602;0.643)	0.621; 95% CI: (0.594;0.647)	0.833; 95% CI: (0.806;0.86)	0.692; 95% CI: (0.664;0.721)	0.799; 95% CI: (0.784;0.813)	0.657; 95% CI: (0.62;0.693)
KEGG_Osteoclast_differentiation_Main_Pathway	0.598; 95% CI: (0.58;0.616)	0.647; 95% CI: (0.63;0.665)	0.534; 95% CI: (0.504;0.572)	0.721; 95% CI: (0.692;0.751)	0.755; 95% CI: (0.742;0.769)	0.657; 95% CI: (0.64;0.674)	0.719; 95% CI: (0.698;0.74)	0.567; 95% CI: (0.533;0.602)	0.69; 95% CI: (0.668;0.713)	0.688; 95% CI: (0.672;0.705)	0.631; 95% CI: (0.604;0.657)	0.703; 95% CI: (0.673;0.733)	0.556; 95% CI: (0.522;0.591)	0.751; 95% CI: (0.738;0.763)	0.583; 95% CI: (0.538;0.627)
KEGG_Oxytocin_signaling_Main_Pathway	0.559; 95% CI: (0.542;0.576)	0.681; 95% CI: (0.663;0.698)	0.501; 95% CI: (0.539;0.54)	0.705; 95% CI: (0.674;0.736)	0.767; 95% CI: (0.738;0.796)	0.661; 95% CI: (0.642;0.679)	0.785; 95% CI: (0.764;0.805)	0.554; 95% CI: (0.52;0.588)	0.737; 95% CI: (0.718;0.756)	0.715; 95% CI: (0.697;0.734)	0.661; 95% CI: (0.633;0.689)	0.724; 95% CI: (0.696;0.751)	0.596; 95% CI: (0.563;0.629)	0.757; 95% CI: (0.736;0.778)	0.596; 95% CI: (0.557;0.635)
KEGG_p53_signaling_Main_Pathway	0.513; 95% CI: (0.508;0.534)	0.539; 95% CI: (0.517;0.561)	0.636; 95% CI: (0.605;0.667)	0.676; 95% CI: (0.652;0.7)	0.727; 95% CI: (0.705;0.75)	0.704; 95% CI: (0.689;0.718)	0.71; 95% CI: (0.688;0.732)	0.545; 95% CI: (0.507;0.584)	0.679; 95% CI: (0.656;0.702)	0.575; 95% CI: (0.554;0.595)	0.676; 95% CI: (0.651;0.701)	0.513; 95% CI: (0.517;0.543)	0.57; 95% CI: (0.538;0.602)	0.765; 95% CI: (0.755;0.775)	0.53; 95% CI: (0.512;0.572)
KEGG_Pancreatic_cancer_Main_Pathway	0.551; 95% CI: (0.533;0.57)	0.602; 95% CI: (0.584;0.621)	0.522; 95% CI: (0.517;0.562)	0.774; 95% CI: (0.744;0.804)	0.706; 95% CI: (0.683;0.729)	0.682; 95% CI: (0.666;0.697)	0.749; 95% CI: (0.726;0.772)	0.63; 95% CI: (0.6;0.661)	0.652; 95% CI: (0.629;0.674)	0.709; 95% CI: (0.696;0.723)	0.668; 95% CI: (0.646;0.69)	0.621; 95% CI: (0.594;0.648)	0.522; 95% CI: (0.511;0.556)	0.529; 95% CI: (0.509;0.549)	0.527; 95% CI: (0.516;0.571)
KEGG_Pathways_in_cancer_Main_Pathway	0.536; 95% CI: (0.517;0.554)	0.569; 95% CI: (0.548;0.591)	0.6; 95% CI: (0.564;0.635)	0.734; 95% CI: (0.71;0.757)	0.784; 95% CI: (0.756;0.811)	0.764; 95% CI: (0.747;0.78)	0.793; 95% CI: (0.772;0.814)	0.57; 95% CI: (0.534;0.607)	0.754; 95% CI: (0.735;0.772)	0.565; 95% CI: (0.546;0.584)	0.753; 95% CI: (0.725;0.78)	0.647; 95% CI: (0.619;0.676)	0.608; 95% CI: (0.575;0.641)	0.769; 95% CI: (0.754;0.785)	0.539; 95% CI: (0.5;0.577)
KEGG_Phosphatidylinositol_signaling_system_Main_Pathway	0.616; 95% CI: (0.598;0.633)	0.605; 95% CI: (0.586;0.624)	0.503; 95% CI: (0.536;0.543)	0.815; 95% CI: (0.788;0.842)	0.781; 95% CI: (0.769;0.793)	0.655; 95% CI: (0.638;0.673)	0.721; 95% CI: (0.699;0.742)	0.575; 95% CI: (0.541;0.609)	0.669; 95% CI: (0.647;0.69)	0.703; 95% CI: (0.686;0.72)	0.681; 95% CI: (0.656;0.706)	0.68; 95% CI: (0.65;0.709)	0.549; 95% CI: (0.515;0.584)	0.773; 95% CI: (0.761;0.785)	0.573; 95% CI: (0.53;0.617)
KEGG_PI3K_Akt_signaling_Main_Pathway	0.54; 95% CI: (0.522;0.558)	0.562; 95% CI: (0.541;0.583)	0.595; 95% CI: (0.56;0.63)	0.731; 95% CI: (0.707;0.755)	0.786; 95% CI: (0.759;0.813)	0.74; 95% CI: (0.724;0.756)	0.796; 95% CI: (0.776;0.817)	0.546; 95% CI: (0.51;0.583)	0.747; 95% CI: (0.728;0.765)	0.553; 95% CI: (0.534;0.572)	0.735; 95% CI: (0.708;0.761)	0.599; 95% CI: (0.568;0.63)	0.616; 95% CI: (0.584;0.647)	0.823; 95% CI: (0.807;0.839)	0.551; 95% CI: (0.514;0.589)
KEGG_Platelet_activation_Main_Pathway	0.599; 95% CI: (0.582;0.617)	0.694; 95% CI: (0.678;0.711)	0.53; 95% CI: (0.508;0.569)	0.723; 95% CI: (0.694;0.753)	0.809; 95% CI: (0.793;0.825)	0.646; 95% CI: (0.627;0.665)	0.746; 95% CI: (0.726;0.766)	0.538; 95% CI: (0.501;0.574)	0.717; 95% CI: (0.697;0.738)	0.689; 95% CI: (0.671;0.707)	0.66; 95% CI: (0.633;0.687)	0.7; 95% CI: (0.67;0.73)	0.612; 95% CI: (0.579;0.644)	0.793; 95% CI: (0.779;0.807)	0.623; 95% CI: (0.582;0.665)
KEGG_Prolactin_signaling_Main_Pathway	0.55; 95% CI: (0.532;0.567)	0.648; 95% CI: (0.632;0.664)	0.53; 95% CI: (0.508;0.567)	0.768; 95% CI: (0.739;0.796)	0.663; 95% CI: (0.635;0.691)	0.665; 95% CI: (0.649;0.68)	0.776; 95% CI: (0.755;0.796)	0.589; 95% CI: (0.557;0.62)	0.652; 95% CI: (0.629;0.674)	0.685; 95% CI: (0.67;0.7)	0.652; 95% CI: (0.63;0.674)	0.647; 95% CI: (0.616;0.677)	0.548; 95% CI: (0.515;0.58)	0.655; 95% CI: (0.634;0.675)	0.519; 95% CI: (0.524;0.562)
KEGG_Prostate_cancer_Main_Pathway	0.54; 95% CI: (0.521;0.56)	0.549; 95% CI: (0.526;0.573)	0.619; 95% CI: (0.585;0.653)	0.716; 95% CI: (0.692;0.741)	0.776; 95% CI: (0.747;0.805)	0.788; 95% CI: (0.774;0.803)	0.795; 95% CI: (0.774;0.816)	0.551; 95% CI: (0.513;0.589)	0.715; 95% CI: (0.695;0.736)	0.508; 95% CI: (0.513;0.529)	0.734; 95% CI: (0.707;0.76)	0.562; 95% CI: (0.536;0.589)	0.585; 95% CI: (0.551;0.618)	0.682; 95% CI: (0.665;0.698)	0.525; 95% CI: (0.516;0.566)
KEGG_Protein_digestion_and_absorption_Main_Pathway	0.547; 95% CI: (0.529;0.566)	0.692; 95% CI: (0.675;0.708)	0.518; 95% CI: (0.519;0.556)	0.554; 95% CI: (0.518;0.59)	0.773; 95% CI: (0.755;0.791)	0.612; 95% CI: (0.593;0.631)	0.755; 95% CI: (0.735;0.774)	0.525; 95% CI: (0.51;0.561)	0.759; 95% CI: (0.74;0.779)	0.653; 95% CI: (0.634;0.672)	0.671; 95% CI: (0.646;0.696)	0.748; 95% CI: (0.718;0.777)	0.587; 95% CI: (0.555;0.619)	0.76; 95% CI: (0.745;0.775)	0.592; 95% CI: (0.551;0.632)
KEGG_Proteoglycans_in_cancer_Main_Pathway	0.545; 95% CI: (0.527;0.562)	0.675; 95% CI: (0.657;0.692)	0.501; 95% CI: (0.539;0.541)	0.733; 95% CI: (0.704;0.762)	0.777; 95% CI: (0.747;0.806)	0.681; 95% CI: (0.662;0.7)	0.78; 95% CI: (0.758;0.801)	0.564; 95% CI: (0.532;0.597)	0.73; 95% CI: (0.71;0.749)	0.732; 95% CI: (0.714;0.75)	0.706; 95% CI: (0.679;0.734)	0.733; 95% CI: (0.707;0.759)	0.582; 95% CI: (0.547;0.617)	0.638; 95% CI: (0.618;0.658)	0.559; 95% CI: (0.514;0.603)
KEGG_Purine_metabolism_Main_Pathway	0.555; 95% CI: (0.536;0.574)	0.693; 95% CI: (0.677;0.709)	0.509; 95% CI: (0.53;0.548)	0.561; 95% CI: (0.525;0.598)	0.755; 95% CI: (0.737;0.773)	0.633; 95% CI: (0.615;0.651)	0.755; 95% CI: (0.735;0.775)	0.527; 95% CI: (0.509;0.563)	0.735; 95% CI: (0.715;0.754)	0.641; 95% CI: (0.621;0.66)	0.641; 95% CI: (0.615;0.667)	0.713; 95% CI: (0.684;0.741)	0.595; 95% CI: (0.563;0.628)	0.755; 95% CI: (0.741;0.769)	0.62; 95% CI: (0.577;0.663)
KEGG_Rap1_signaling_Main_Pathway	0.545; 95% CI: (0.528;0.563)	0.697; 95% CI: (0.679;0.714)	0.515; 95% CI: (0.525;0.554)	0.711; 95% CI: (0.681;0.742)	0.786; 95% CI: (0.758;0.814)	0.668; 95% CI: (0.648;0.687)	0.785; 95% CI: (0.764;0.807)	0.535; 95% CI: (0.503;0.568)	0.731; 95% CI: (0.712;0.751)	0.725; 95% CI: (0.707;0.744)	0.712; 95% CI: (0.686;0.739)	0.74; 95% CI: (0.714;0.766)	0.606; 95% CI: (0.573;0.64)	0.665; 95% CI: (0.646;0.685)	0.602; 95% CI: (0.562;0.642)
KEGG_Ras_signaling_Main_Pathway	0.556; 95% CI: (0.539;0.574)	0.668; 95% CI: (0.65;0.685)	0.503; 95% CI: (0.535;0.541)	0.713; 95% CI: (0.683;0.743)	0.749; 95% CI: (0.721;0.776)	0.661; 95% CI: (0.642;0.68)	0.785; 95% CI: (0.764;0.806)	0.544; 95% CI: (0.51;0.579)	0.726; 95% CI: (0.707;0.746)	0.706; 95% CI: (0.688;0.724)	0.696; 95% CI: (0.67;0.723)	0.708; 95% CI: (0.678;0.737)	0.6; 95% CI: (0.566;0.634)	0.756; 95% CI: (0.736;0.776)	0.604; 95% CI: (0.565;0.643)
KEGG_Regulation_of_actin_cytoskeleton_Main_Pathway	0.539; 95% CI: (0.521;0.556)	0.686; 95% CI: (0.669;0.704)	0.508; 95% CI: (0.531;0.546)	0.728; 95% CI: (0.697;0.759)	0.792; 95% CI: (0.763;0.82)	0.674; 95% CI: (0.655;0.694)	0.788; 95% CI: (0.768;0.808)	0.584; 95% CI: (0.548;0.619)	0.722; 95% CI: (0.702;0.742)	0.718; 95% CI: (0.7;0.737)	0.711; 95% CI: (0.683;0.738)	0.732; 95% CI: (0.706;0.759)	0.574; 95% CI: (0.539;0.609)	0.623; 95% CI: (0.603;0.643)	0.595; 95% CI: (0.554;0.635)
KEGG_Renal_cell_carcinoma_Main_Pathway	0.607; 95% CI: (0.588;0.626)	0.598; 95% CI: (0.582;0.614)	0.547; 95% CI: (0.509;0.585)	0.818; 95% CI: (0.79;0.846)	0.647; 95% CI: (0.629;0.665)	0.621; 95% CI: (0.606;0.635)	0.657; 95% CI: (0.635;0.679)	0.586; 95% CI: (0.558;0.613)	0.589; 95% CI: (0.567;0.611)	0.646; 95% CI: (0.633;0.66)	0.616; 95% CI: (0.595;0.637)	0.554; 95% CI: (0.525;0.582)	0.54; 95% CI: (0.509;0.571)	0.666; 95% CI: (0.654;0.678)	0.5; 95% CI: (0.541;0.542)
KEGG_Retinol_metabolism_Main_Pathway	0.509; 95% CI: (0.509;0.526)	0.597; 95% CI: (0.582;0.612)	0.504; 95% CI: (0.531;0.539)	0.54; 95% CI: (0.506;0.573)	0.663; 95% CI: (0.653;0.674)	0.583; 95% CI: (0.567;0.599)	0.626; 95% CI: (0.604;0.648)	0.549; 95% CI: (0.519;0.579)	0.667; 95% CI: (0.645;0.689)	0.599; 95% CI: (0.582;0.615)	0.584; 95% CI: (0.561;0.607)	0.762; 95% CI: (0.733;0.79)	0.543; 95% CI: (0.512;0.574)	0.656; 95% CI: (0.645;0.667)	0.555; 95% CI: (0.512;0.598)
KEGG_Small_cell_lung_cancer_Main_Pathway	0.614; 95% CI: (0.595;0.632)	0.649; 95% CI: (0.631;0.667)	0.503; 95% CI: (0.537;0.542)	0.788; 95% CI: (0.76;0.817)	0.776; 95% CI: (0.765;0.786)	0.649; 95% CI: (0.631;0.667)	0.707; 95% CI: (0.686;0.728)	0.569; 95% CI: (0.533;0.604)	0.686; 95% CI: (0.665;0.708)	0.68; 95% CI: (0.662;0.697)	0.668; 95% CI: (0.643;0.693)	0.672; 95% CI: (0.643;0.701)	0.568; 95% CI: (0.535;0.601)	0.744; 95% CI: (0.729;0.759)	0.559; 95% CI: (0.517;0.602)
KEGG_Sphingolipid_signaling_Main_Pathway	0.55; 95% CI: (0.531;0.569)	0.558; 95% CI: (0.536;0.581)	0.582; 95% CI: (0.548;0.617)	0.734; 95% CI: (0.71;0.757)	0.76; 95% CI: (0.732;0.787)	0.751; 95% CI: (0.736;0.766)	0.795; 95% CI: (0.775;0.815)	0.57; 95% CI: (0.532;0.607)	0.723; 95% CI: (0.703;0.744)	0.509; 95% CI: (0.51;0.529)	0.721; 95% CI: (0.696;0.746)	0.556; 95% CI: (0.527;0.585)	0.591; 95% CI: (0.559;0.623)	0.79; 95% CI: (0.774;0.805)	0.507; 95% CI: (0.533;0.548)
KEGG_T_cell_receptor_signaling_Main_Pathway	0.556; 95% CI: (0.539;0.574)	0.672; 95% CI: (0.655;0.688)	0.524; 95% CI: (0.514;0.561)	0.741; 95% CI: (0.711;0.77)	0.708; 95% CI: (0.681;0.735)	0.671; 95% CI: (0.654;0.688)	0.784; 95% CI: (0.763;0.804)	0.583; 95% CI: (0.549;0.617)	0.682; 95% CI: (0.659;0.704)	0.688; 95% CI: (0.671;0.704)	0.674; 95% CI: (0.651;0.697)	0.672; 95% CI: (0.643;0.701)	0.588; 95% CI: (0.556;0.621)	0.686; 95% CI: (0.665;0.707)	0.569; 95% CI: (0.525;0.613)
KEGG_Thyroid_cancer_Main_Pathway	0.593; 95% CI: (0.579;0.607)	0.647; 95% CI: (0.637;0.658)	0.542; 95% CI: (0.511;0.573)	0.572; 95% CI: (0.537;0.607)	0.594; 95% CI: (0.568;0.62)	0.626; 95% CI: (0.613;0.638)	0.754; 95% CI: (0.732;0.775)	0.607; 95% CI: (0.584;0.63)	0.624; 95% CI: (0.601;0.646)	0.639; 95% CI: (0.627;0.651)	0.631; 95% CI: (0.615;0.647)	0.745; 95% CI: (0.722;0.767)	0.512; 95% CI: (0.517;0.54)	0.668; 95% CI: (0.646;0.689)	0.535; 95% CI: (0.502;0.571)
KEGG_Thyroid_hormone_signaling_Main_Pathway	0.559; 95% CI: (0.54;0.578)	0.555; 95% CI: (0.532;0.578)	0.604; 95% CI: (0.571;0.637)	0.705; 95% CI: (0.681;0.729)	0.748; 95% CI: (0.72;0.776)	0.757; 95% CI: (0.742;0.772)	0.793; 95% CI: (0.773;0.814)	0.549; 95% CI: (0.512;0.585)	0.725; 95% CI: (0.705;0.745)	0.507; 95% CI: (0.514;0.527)	0.73; 95% CI: (0.704;0.755)	0.553; 95% CI: (0.525;0.581)	0.585; 95% CI: (0.553;0.616)	0.782; 95% CI: (0.766;0.799)	0.546; 95% CI: (0.504;0.588)
KEGG_Tight_junction_Main_Pathway	0.512; 95% CI: (0.506;0.529)	0.682; 95% CI: (0.665;0.699)	0.505; 95% CI: (0.533;0.544)	0.732; 95% CI: (0.703;0.761)	0.739; 95% CI: (0.709;0.768)	0.639; 95% CI: (0.62;0.658)	0.777; 95% CI: (0.756;0.799)	0.547; 95% CI: (0.515;0.578)	0.734; 95% CI: (0.715;0.754)	0.684; 95% CI: (0.666;0.703)	0.677; 95% CI: (0.651;0.703)	0.709; 95% CI: (0.681;0.736)	0.6; 95% CI: (0.567;0.633)	0.724; 95% CI: (0.703;0.745)	0.576; 95% CI: (0.534;0.618)
KEGG_TNF_signaling_Main_Pathway	0.607; 95% CI: (0.588;0.625)	0.626; 95% CI: (0.61;0.643)	0.547; 95% CI: (0.508;0.585)	0.78; 95% CI: (0.751;0.808)	0.698; 95% CI: (0.683;0.714)	0.624; 95% CI: (0.607;0.641)	0.7; 95% CI: (0.678;0.721)	0.576; 95% CI: (0.544;0.608)	0.615; 95% CI: (0.592;0.637)	0.665; 95% CI: (0.65;0.679)	0.629; 95% CI: (0.606;0.652)	0.59; 95% CI: (0.56;0.621)	0.547; 95% CI: (0.514;0.579)	0.7; 95% CI: (0.688;0.712)	0.563; 95% CI: (0.517;0.609)
KEGG_Toll_like_receptor_signaling_Main_Pathway	0.585; 95% CI: (0.567;0.604)	0.635; 95% CI: (0.618;0.652)	0.544; 95% CI: (0.505;0.583)	0.764; 95% CI: (0.735;0.792)	0.717; 95% CI: (0.699;0.735)	0.638; 95% CI: (0.621;0.656)	0.681; 95% CI: (0.659;0.703)	0.544; 95% CI: (0.509;0.579)	0.649; 95% CI: (0.627;0.671)	0.66; 95% CI: (0.643;0.678)	0.648; 95% CI: (0.624;0.672)	0.67; 95% CI: (0.639;0.7)	0.567; 95% CI: (0.533;0.601)	0.725; 95% CI: (0.713;0.737)	0.591; 95% CI: (0.545;0.637)
KEGG_Transcriptional_misregulation_in_cancer_Main_Pathway	0.536; 95% CI: (0.516;0.556)	0.559; 95% CI: (0.536;0.582)	0.598; 95% CI: (0.562;0.635)	0.566; 95% CI: (0.53;0.602)	0.685; 95% CI: (0.657;0.712)	0.714; 95% CI: (0.698;0.73)	0.766; 95% CI: (0.745;0.787)	0.52; 95% CI: (0.518;0.558)	0.737; 95% CI: (0.717;0.757)	0.501; 95% CI: (0.519;0.521)	0.677; 95% CI: (0.651;0.704)	0.578; 95% CI: (0.549;0.607)	0.606; 95% CI: (0.574;0.639)	0.836; 95% CI: (0.825;0.848)	0.566; 95% CI: (0.526;0.606)
KEGG_Type_II_diabetes_mellitus_Main_Pathway	0.603; 95% CI: (0.585;0.622)	0.558; 95% CI: (0.543;0.573)	0.545; 95% CI: (0.509;0.58)	0.837; 95% CI: (0.809;0.866)	0.629; 95% CI: (0.622;0.636)	0.603; 95% CI: (0.591;0.614)	0.602; 95% CI: (0.58;0.623)	0.576; 95% CI: (0.554;0.599)	0.532; 95% CI: (0.512;0.551)	0.611; 95% CI: (0.6;0.622)	0.585; 95% CI: (0.567;0.603)	0.503; 95% CI: (0.521;0.527)	0.541; 95% CI: (0.513;0.57)	0.625; 95% CI: (0.616;0.634)	0.513; 95% CI: (0.522;0.548)
KEGG_Ubiquitin_mediated_proteolysis_Main_Pathway	0.544; 95% CI: (0.526;0.563)	0.71; 95% CI: (0.694;0.725)	0.543; 95% CI: (0.504;0.583)	0.61; 95% CI: (0.573;0.646)	0.756; 95% CI: (0.739;0.773)	0.518; 95% CI: (0.504;0.54)	0.763; 95% CI: (0.743;0.784)	0.529; 95% CI: (0.505;0.563)	0.702; 95% CI: (0.681;0.723)	0.662; 95% CI: (0.644;0.68)	0.676; 95% CI: (0.652;0.701)	0.628; 95% CI: (0.599;0.656)	0.534; 95% CI: (0.501;0.568)	0.767; 95% CI: (0.754;0.78)	0.602; 95% CI: (0.557;0.646)
KEGG_VEGF_signaling_Main_Pathway	0.561; 95% CI: (0.544;0.578)	0.653; 95% CI: (0.637;0.669)	0.514; 95% CI: (0.524;0.552)	0.76; 95% CI: (0.731;0.789)	0.678; 95% CI: (0.651;0.705)	0.665; 95% CI: (0.648;0.681)	0.767; 95% CI: (0.746;0.789)	0.581; 95% CI: (0.55;0.612)	0.666; 95% CI: (0.644;0.688)	0.69; 95% CI: (0.675;0.705)	0.652; 95% CI: (0.629;0.676)	0.66; 95% CI: (0.63;0.69)	0.538; 95% CI: (0.504;0.571)	0.663; 95% CI: (0.642;0.684)	0.537; 95% CI: (0.504;0.579)
KEGG_Viral_carcinogenesis_Main_Pathway	0.544; 95% CI: (0.525;0.562)	0.571; 95% CI: (0.549;0.593)	0.548; 95% CI: (0.51;0.585)	0.681; 95% CI: (0.653;0.71)	0.785; 95% CI: (0.758;0.811)	0.734; 95% CI: (0.717;0.75)	0.784; 95% CI: (0.763;0.804)	0.57; 95% CI: (0.532;0.607)	0.743; 95% CI: (0.723;0.762)	0.526; 95% CI: (0.506;0.545)	0.702; 95% CI: (0.675;0.73)	0.586; 95% CI: (0.556;0.617)	0.607; 95% CI: (0.576;0.639)	0.816; 95% CI: (0.8;0.831)	0.549; 95% CI: (0.508;0.59)
KEGG_Wnt_signaling_Main_Pathway	0.506; 95% CI: (0.513;0.525)	0.678; 95% CI: (0.663;0.693)	0.513; 95% CI: (0.524;0.551)	0.65; 95% CI: (0.617;0.682)	0.743; 95% CI: (0.731;0.756)	0.621; 95% CI: (0.602;0.639)	0.792; 95% CI: (0.775;0.81)	0.516; 95% CI: (0.519;0.55)	0.679; 95% CI: (0.657;0.7)	0.64; 95% CI: (0.622;0.659)	0.605; 95% CI: (0.577;0.633)	0.657; 95% CI: (0.627;0.688)	0.624; 95% CI: (0.59;0.658)	0.727; 95% CI: (0.714;0.74)	0.614; 95% CI: (0.571;0.656)
MAPK_Family_Pathway	0.566; 95% CI: (0.549;0.584)	0.683; 95% CI: (0.665;0.7)	0.513; 95% CI: (0.526;0.552)	0.699; 95% CI: (0.668;0.731)	0.79; 95% CI: (0.761;0.818)	0.684; 95% CI: (0.665;0.703)	0.789; 95% CI: (0.769;0.81)	0.541; 95% CI: (0.51;0.573)	0.73; 95% CI: (0.71;0.75)	0.719; 95% CI: (0.7;0.738)	0.709; 95% CI: (0.682;0.736)	0.725; 95% CI: (0.698;0.752)	0.569; 95% CI: (0.533;0.604)	0.681; 95% CI: (0.662;0.699)	0.613; 95% CI: (0.572;0.654)
MAPK_Signaling_Pathway	0.554; 95% CI: (0.537;0.572)	0.619; 95% CI: (0.599;0.639)	0.55; 95% CI: (0.515;0.585)	0.659; 95% CI: (0.63;0.689)	0.842; 95% CI: (0.817;0.867)	0.73; 95% CI: (0.714;0.746)	0.805; 95% CI: (0.784;0.826)	0.514; 95% CI: (0.518;0.546)	0.773; 95% CI: (0.756;0.791)	0.609; 95% CI: (0.591;0.628)	0.741; 95% CI: (0.715;0.766)	0.704; 95% CI: (0.675;0.732)	0.632; 95% CI: (0.601;0.663)	0.833; 95% CI: (0.819;0.847)	0.586; 95% CI: (0.547;0.624)
MAPK_Signaling_Pathway_Gene_Expression_Cell_Proliferation_Cell_Survival_Tumorigenesis_Differentiation_Development_via_PXN_CREB3_RPS6KA5_RPS6KA6	0.518; 95% CI: (0.501;0.537)	0.661; 95% CI: (0.645;0.677)	0.505; 95% CI: (0.535;0.545)	0.52; 95% CI: (0.517;0.557)	0.724; 95% CI: (0.708;0.74)	0.637; 95% CI: (0.619;0.654)	0.707; 95% CI: (0.685;0.73)	0.544; 95% CI: (0.509;0.579)	0.679; 95% CI: (0.657;0.701)	0.669; 95% CI: (0.652;0.686)	0.654; 95% CI: (0.631;0.678)	0.756; 95% CI: (0.73;0.782)	0.514; 95% CI: (0.519;0.548)	0.522; 95% CI: (0.5;0.544)	0.563; 95% CI: (0.517;0.608)
Mitochondrial_Apoptosis_Pathway	0.594; 95% CI: (0.575;0.612)	0.556; 95% CI: (0.532;0.579)	0.575; 95% CI: (0.541;0.609)	0.619; 95% CI: (0.588;0.65)	0.764; 95% CI: (0.74;0.788)	0.718; 95% CI: (0.703;0.734)	0.767; 95% CI: (0.747;0.788)	0.563; 95% CI: (0.524;0.601)	0.708; 95% CI: (0.686;0.73)	0.533; 95% CI: (0.513;0.554)	0.704; 95% CI: (0.678;0.729)	0.509; 95% CI: (0.52;0.538)	0.597; 95% CI: (0.566;0.628)	0.808; 95% CI: (0.797;0.819)	0.511; 95% CI: (0.533;0.556)
mTOR_Pathway	0.54; 95% CI: (0.523;0.558)	0.583; 95% CI: (0.562;0.603)	0.578; 95% CI: (0.541;0.614)	0.713; 95% CI: (0.688;0.739)	0.831; 95% CI: (0.804;0.858)	0.74; 95% CI: (0.724;0.756)	0.804; 95% CI: (0.783;0.824)	0.549; 95% CI: (0.514;0.584)	0.759; 95% CI: (0.741;0.777)	0.581; 95% CI: (0.562;0.6)	0.747; 95% CI: (0.721;0.773)	0.65; 95% CI: (0.62;0.679)	0.628; 95% CI: (0.596;0.66)	0.805; 95% CI: (0.79;0.819)	0.552; 95% CI: (0.511;0.594)
NCI_a6b1_and_a6b4_Integrin_signaling_Main_Pathway	0.619; 95% CI: (0.6;0.638)	0.585; 95% CI: (0.565;0.605)	0.515; 95% CI: (0.525;0.555)	0.786; 95% CI: (0.756;0.815)	0.736; 95% CI: (0.719;0.753)	0.644; 95% CI: (0.626;0.662)	0.67; 95% CI: (0.647;0.692)	0.58; 95% CI: (0.547;0.613)	0.635; 95% CI: (0.614;0.656)	0.673; 95% CI: (0.656;0.69)	0.636; 95% CI: (0.609;0.662)	0.595; 95% CI: (0.565;0.624)	0.555; 95% CI: (0.522;0.588)	0.711; 95% CI: (0.693;0.73)	0.579; 95% CI: (0.534;0.625)
NCI_Angiopoietin_receptor_Tie2_mediated_signaling_Main_Pathway	0.611; 95% CI: (0.593;0.629)	0.629; 95% CI: (0.614;0.645)	0.552; 95% CI: (0.514;0.591)	0.8; 95% CI: (0.773;0.827)	0.691; 95% CI: (0.677;0.705)	0.62; 95% CI: (0.604;0.636)	0.677; 95% CI: (0.655;0.699)	0.578; 95% CI: (0.547;0.608)	0.6; 95% CI: (0.578;0.622)	0.648; 95% CI: (0.632;0.664)	0.644; 95% CI: (0.622;0.665)	0.606; 95% CI: (0.575;0.637)	0.554; 95% CI: (0.521;0.587)	0.69; 95% CI: (0.678;0.702)	0.529; 95% CI: (0.514;0.572)
NCI_Atypical_NF_kappaB_Main_Pathway	0.622; 95% CI: (0.604;0.64)	0.568; 95% CI: (0.554;0.583)	0.539; 95% CI: (0.505;0.574)	0.828; 95% CI: (0.8;0.856)	0.631; 95% CI: (0.625;0.637)	0.601; 95% CI: (0.59;0.613)	0.609; 95% CI: (0.588;0.63)	0.564; 95% CI: (0.539;0.588)	0.519; 95% CI: (0.5;0.538)	0.607; 95% CI: (0.596;0.619)	0.594; 95% CI: (0.577;0.61)	0.514; 95% CI: (0.511;0.54)	0.52; 95% CI: (0.508;0.547)	0.628; 95% CI: (0.62;0.636)	0.515; 95% CI: (0.52;0.55)
NCI_Atypical_NF_kappaB_Pathway_(positive_regulation_of_anti_apoptosis)	0.617; 95% CI: (0.599;0.635)	0.559; 95% CI: (0.545;0.573)	0.541; 95% CI: (0.507;0.575)	0.831; 95% CI: (0.803;0.859)	0.62; 95% CI: (0.614;0.625)	0.595; 95% CI: (0.584;0.606)	0.593; 95% CI: (0.572;0.613)	0.563; 95% CI: (0.54;0.585)	0.507; 95% CI: (0.511;0.526)	0.603; 95% CI: (0.592;0.613)	0.585; 95% CI: (0.569;0.601)	0.507; 95% CI: (0.518;0.531)	0.519; 95% CI: (0.508;0.545)	0.618; 95% CI: (0.61;0.626)	0.509; 95% CI: (0.525;0.543)
NCI_BCR_signaling_Main_Pathway	0.632; 95% CI: (0.615;0.65)	0.637; 95% CI: (0.621;0.653)	0.53; 95% CI: (0.509;0.568)	0.768; 95% CI: (0.74;0.796)	0.723; 95% CI: (0.71;0.735)	0.645; 95% CI: (0.628;0.661)	0.701; 95% CI: (0.679;0.723)	0.587; 95% CI: (0.556;0.619)	0.637; 95% CI: (0.614;0.659)	0.673; 95% CI: (0.657;0.689)	0.649; 95% CI: (0.626;0.672)	0.611; 95% CI: (0.579;0.643)	0.532; 95% CI: (0.501;0.565)	0.695; 95% CI: (0.678;0.712)	0.59; 95% CI: (0.545;0.634)
NCI_BCR_signaling_Pathway_(cytokine_secretion)	0.612; 95% CI: (0.595;0.63)	0.582; 95% CI: (0.568;0.596)	0.538; 95% CI: (0.503;0.573)	0.809; 95% CI: (0.781;0.837)	0.634; 95% CI: (0.627;0.642)	0.603; 95% CI: (0.59;0.615)	0.642; 95% CI: (0.62;0.664)	0.587; 95% CI: (0.566;0.609)	0.533; 95% CI: (0.513;0.553)	0.617; 95% CI: (0.605;0.628)	0.6; 95% CI: (0.583;0.616)	0.508; 95% CI: (0.518;0.534)	0.539; 95% CI: (0.51;0.568)	0.635; 95% CI: (0.627;0.643)	0.519; 95% CI: (0.519;0.557)
NCI_Beta1_integrin_cell_surface_interactions_Main_Pathway	0.529; 95% CI: (0.51;0.547)	0.66; 95% CI: (0.643;0.678)	0.532; 95% CI: (0.507;0.571)	0.557; 95% CI: (0.521;0.594)	0.767; 95% CI: (0.749;0.784)	0.625; 95% CI: (0.606;0.644)	0.751; 95% CI: (0.731;0.771)	0.545; 95% CI: (0.509;0.58)	0.759; 95% CI: (0.74;0.778)	0.666; 95% CI: (0.647;0.684)	0.646; 95% CI: (0.62;0.673)	0.739; 95% CI: (0.71;0.768)	0.603; 95% CI: (0.57;0.636)	0.754; 95% CI: (0.738;0.77)	0.621; 95% CI: (0.58;0.661)
NCI_C_MYB_transcription_factor_network_Main_Pathway	0.506; 95% CI: (0.511;0.524)	0.668; 95% CI: (0.653;0.683)	0.54; 95% CI: (0.504;0.577)	0.59; 95% CI: (0.552;0.628)	0.652; 95% CI: (0.624;0.68)	0.617; 95% CI: (0.599;0.634)	0.765; 95% CI: (0.744;0.785)	0.565; 95% CI: (0.532;0.598)	0.703; 95% CI: (0.681;0.726)	0.653; 95% CI: (0.636;0.67)	0.642; 95% CI: (0.618;0.665)	0.704; 95% CI: (0.676;0.731)	0.557; 95% CI: (0.524;0.59)	0.657; 95% CI: (0.637;0.677)	0.572; 95% CI: (0.531;0.613)
NCI_Canonical_Wnt_signaling_Main_Pathway	0.547; 95% CI: (0.532;0.562)	0.615; 95% CI: (0.605;0.625)	0.547; 95% CI: (0.519;0.574)	0.666; 95% CI: (0.633;0.698)	0.616; 95% CI: (0.603;0.628)	0.589; 95% CI: (0.576;0.602)	0.819; 95% CI: (0.803;0.835)	0.551; 95% CI: (0.517;0.586)	0.556; 95% CI: (0.534;0.577)	0.599; 95% CI: (0.587;0.612)	0.577; 95% CI: (0.557;0.597)	0.568; 95% CI: (0.541;0.596)	0.547; 95% CI: (0.518;0.577)	0.623; 95% CI: (0.614;0.632)	0.53; 95% CI: (0.505;0.565)
NCI_CDC42_signaling_events_Main_Pathway	0.631; 95% CI: (0.613;0.649)	0.657; 95% CI: (0.64;0.674)	0.519; 95% CI: (0.521;0.56)	0.784; 95% CI: (0.756;0.811)	0.74; 95% CI: (0.726;0.754)	0.633; 95% CI: (0.615;0.651)	0.752; 95% CI: (0.734;0.77)	0.544; 95% CI: (0.511;0.577)	0.606; 95% CI: (0.583;0.629)	0.676; 95% CI: (0.66;0.693)	0.654; 95% CI: (0.63;0.678)	0.595; 95% CI: (0.564;0.626)	0.561; 95% CI: (0.528;0.594)	0.722; 95% CI: (0.706;0.739)	0.574; 95% CI: (0.527;0.62)
NCI_Class_I_PI3K_signaling_events_Main_Pathway	0.542; 95% CI: (0.525;0.56)	0.589; 95% CI: (0.572;0.607)	0.505; 95% CI: (0.533;0.542)	0.823; 95% CI: (0.796;0.849)	0.663; 95% CI: (0.637;0.69)	0.656; 95% CI: (0.64;0.672)	0.749; 95% CI: (0.727;0.772)	0.613; 95% CI: (0.584;0.643)	0.633; 95% CI: (0.61;0.655)	0.681; 95% CI: (0.667;0.695)	0.663; 95% CI: (0.643;0.683)	0.631; 95% CI: (0.601;0.661)	0.528; 95% CI: (0.504;0.561)	0.649; 95% CI: (0.628;0.669)	0.513; 95% CI: (0.527;0.554)
NCI_Class_I_PI3K_signaling_events_Pathway_(actin_cytoskeleton_reorganization)	0.539; 95% CI: (0.522;0.556)	0.556; 95% CI: (0.539;0.572)	0.519; 95% CI: (0.516;0.554)	0.841; 95% CI: (0.814;0.867)	0.614; 95% CI: (0.589;0.64)	0.635; 95% CI: (0.622;0.648)	0.714; 95% CI: (0.691;0.737)	0.628; 95% CI: (0.606;0.649)	0.573; 95% CI: (0.551;0.595)	0.654; 95% CI: (0.642;0.666)	0.626; 95% CI: (0.607;0.644)	0.579; 95% CI: (0.551;0.608)	0.503; 95% CI: (0.526;0.532)	0.604; 95% CI: (0.585;0.624)	0.556; 95% CI: (0.522;0.59)
NCI_Class_I_PI3K_signaling_events_Pathway_(cell_survival)	0.535; 95% CI: (0.518;0.553)	0.547; 95% CI: (0.53;0.564)	0.512; 95% CI: (0.523;0.546)	0.847; 95% CI: (0.821;0.872)	0.619; 95% CI: (0.593;0.644)	0.634; 95% CI: (0.621;0.648)	0.723; 95% CI: (0.7;0.745)	0.631; 95% CI: (0.609;0.653)	0.574; 95% CI: (0.551;0.596)	0.655; 95% CI: (0.642;0.667)	0.631; 95% CI: (0.613;0.65)	0.56; 95% CI: (0.531;0.588)	0.504; 95% CI: (0.526;0.533)	0.607; 95% CI: (0.587;0.626)	0.541; 95% CI: (0.505;0.577)
NCI_CXCR3_mediated_signaling_events_Main_Pathway	0.555; 95% CI: (0.538;0.573)	0.634; 95% CI: (0.619;0.649)	0.53; 95% CI: (0.506;0.565)	0.771; 95% CI: (0.743;0.8)	0.622; 95% CI: (0.594;0.65)	0.629; 95% CI: (0.613;0.644)	0.751; 95% CI: (0.729;0.773)	0.612; 95% CI: (0.584;0.64)	0.61; 95% CI: (0.587;0.633)	0.661; 95% CI: (0.646;0.675)	0.637; 95% CI: (0.616;0.658)	0.609; 95% CI: (0.579;0.639)	0.511; 95% CI: (0.52;0.543)	0.628; 95% CI: (0.608;0.647)	0.502; 95% CI: (0.54;0.545)
NCI_CXCR4_mediated_signaling_events_Main_Pathway	0.587; 95% CI: (0.569;0.605)	0.637; 95% CI: (0.619;0.654)	0.547; 95% CI: (0.508;0.585)	0.755; 95% CI: (0.726;0.784)	0.715; 95% CI: (0.697;0.733)	0.62; 95% CI: (0.601;0.638)	0.699; 95% CI: (0.677;0.721)	0.579; 95% CI: (0.544;0.613)	0.651; 95% CI: (0.628;0.674)	0.673; 95% CI: (0.656;0.691)	0.642; 95% CI: (0.617;0.667)	0.653; 95% CI: (0.622;0.685)	0.571; 95% CI: (0.538;0.605)	0.732; 95% CI: (0.719;0.745)	0.567; 95% CI: (0.522;0.612)
NCI_CXCR4_mediated_signaling_events_Pathway_(cell_proliferation)	0.605; 95% CI: (0.587;0.623)	0.56; 95% CI: (0.545;0.574)	0.543; 95% CI: (0.507;0.578)	0.826; 95% CI: (0.797;0.854)	0.621; 95% CI: (0.611;0.631)	0.597; 95% CI: (0.585;0.609)	0.609; 95% CI: (0.588;0.63)	0.586; 95% CI: (0.566;0.606)	0.538; 95% CI: (0.519;0.558)	0.61; 95% CI: (0.6;0.621)	0.582; 95% CI: (0.564;0.6)	0.508; 95% CI: (0.516;0.531)	0.517; 95% CI: (0.51;0.544)	0.624; 95% CI: (0.615;0.632)	0.509; 95% CI: (0.527;0.545)
NCI_CXCR4_mediated_signaling_events_Pathway_(chemotaxis)	0.588; 95% CI: (0.569;0.606)	0.627; 95% CI: (0.61;0.643)	0.545; 95% CI: (0.507;0.583)	0.769; 95% CI: (0.74;0.797)	0.691; 95% CI: (0.672;0.71)	0.614; 95% CI: (0.596;0.632)	0.681; 95% CI: (0.659;0.703)	0.578; 95% CI: (0.545;0.611)	0.633; 95% CI: (0.61;0.656)	0.66; 95% CI: (0.644;0.677)	0.631; 95% CI: (0.606;0.655)	0.628; 95% CI: (0.597;0.659)	0.558; 95% CI: (0.525;0.592)	0.712; 95% CI: (0.7;0.725)	0.554; 95% CI: (0.509;0.599)
NCI_CXCR4_mediated_signaling_events_Pathway_(establishment_of_cell_polarity)	0.602; 95% CI: (0.583;0.62)	0.573; 95% CI: (0.558;0.588)	0.541; 95% CI: (0.504;0.577)	0.818; 95% CI: (0.79;0.846)	0.634; 95% CI: (0.622;0.646)	0.603; 95% CI: (0.59;0.616)	0.618; 95% CI: (0.597;0.64)	0.583; 95% CI: (0.559;0.607)	0.55; 95% CI: (0.529;0.571)	0.623; 95% CI: (0.611;0.634)	0.59; 95% CI: (0.571;0.61)	0.553; 95% CI: (0.525;0.581)	0.521; 95% CI: (0.507;0.55)	0.641; 95% CI: (0.633;0.65)	0.508; 95% CI: (0.53;0.545)
NCI_CXCR4_mediated_signaling_events_Pathway_(regulation_of_heterotypic_cell_cell_adhesion)	0.606; 95% CI: (0.587;0.624)	0.56; 95% CI: (0.546;0.575)	0.541; 95% CI: (0.505;0.576)	0.822; 95% CI: (0.794;0.851)	0.622; 95% CI: (0.612;0.632)	0.598; 95% CI: (0.586;0.609)	0.608; 95% CI: (0.587;0.629)	0.587; 95% CI: (0.567;0.607)	0.547; 95% CI: (0.526;0.567)	0.61; 95% CI: (0.599;0.621)	0.584; 95% CI: (0.566;0.602)	0.509; 95% CI: (0.515;0.532)	0.516; 95% CI: (0.51;0.543)	0.625; 95% CI: (0.616;0.633)	0.511; 95% CI: (0.525;0.547)
NCI_Degradation_of_beta_catenin_Main_Pathway	0.555; 95% CI: (0.541;0.569)	0.608; 95% CI: (0.598;0.618)	0.544; 95% CI: (0.516;0.571)	0.676; 95% CI: (0.643;0.709)	0.619; 95% CI: (0.609;0.629)	0.594; 95% CI: (0.582;0.606)	0.826; 95% CI: (0.81;0.841)	0.555; 95% CI: (0.52;0.589)	0.548; 95% CI: (0.528;0.569)	0.589; 95% CI: (0.575;0.602)	0.576; 95% CI: (0.557;0.596)	0.54; 95% CI: (0.514;0.566)	0.549; 95% CI: (0.52;0.578)	0.619; 95% CI: (0.609;0.628)	0.504; 95% CI: (0.534;0.541)
NCI_Downstream_signaling_in_naive_CD8_T_cells_Main_Pathway	0.54; 95% CI: (0.523;0.557)	0.656; 95% CI: (0.643;0.668)	0.518; 95% CI: (0.518;0.555)	0.568; 95% CI: (0.532;0.605)	0.629; 95% CI: (0.604;0.655)	0.642; 95% CI: (0.628;0.656)	0.761; 95% CI: (0.74;0.783)	0.616; 95% CI: (0.59;0.642)	0.63; 95% CI: (0.607;0.654)	0.654; 95% CI: (0.64;0.668)	0.628; 95% CI: (0.607;0.649)	0.736; 95% CI: (0.714;0.759)	0.502; 95% CI: (0.529;0.533)	0.595; 95% CI: (0.575;0.616)	0.508; 95% CI: (0.534;0.55)
NCI_E_cadherin_signaling_in_keratinocytes_Main_Pathway	0.613; 95% CI: (0.594;0.631)	0.542; 95% CI: (0.523;0.561)	0.519; 95% CI: (0.518;0.557)	0.828; 95% CI: (0.801;0.856)	0.682; 95% CI: (0.673;0.691)	0.639; 95% CI: (0.625;0.653)	0.625; 95% CI: (0.602;0.647)	0.505; 95% CI: (0.527;0.537)	0.557; 95% CI: (0.536;0.579)	0.651; 95% CI: (0.638;0.665)	0.613; 95% CI: (0.592;0.635)	0.55; 95% CI: (0.52;0.579)	0.567; 95% CI: (0.535;0.6)	0.677; 95% CI: (0.666;0.688)	0.505; 95% CI: (0.536;0.546)
NCI_E_cadherin_signaling_in_keratinocytes_Pathway_(apoptosis)	0.634; 95% CI: (0.616;0.652)	0.582; 95% CI: (0.568;0.596)	0.547; 95% CI: (0.511;0.583)	0.859; 95% CI: (0.833;0.885)	0.638; 95% CI: (0.632;0.644)	0.607; 95% CI: (0.595;0.619)	0.607; 95% CI: (0.585;0.628)	0.515; 95% CI: (0.516;0.545)	0.505; 95% CI: (0.514;0.524)	0.623; 95% CI: (0.613;0.633)	0.588; 95% CI: (0.569;0.607)	0.524; 95% CI: (0.501;0.546)	0.559; 95% CI: (0.53;0.588)	0.626; 95% CI: (0.615;0.636)	0.512; 95% CI: (0.524;0.548)
NCI_E_cadherin_signaling_in_keratinocytes_Pathway_(keratinocyte_differentiation)	0.634; 95% CI: (0.616;0.653)	0.587; 95% CI: (0.572;0.601)	0.543; 95% CI: (0.506;0.579)	0.852; 95% CI: (0.826;0.878)	0.649; 95% CI: (0.643;0.655)	0.612; 95% CI: (0.6;0.625)	0.618; 95% CI: (0.596;0.64)	0.514; 95% CI: (0.517;0.545)	0.512; 95% CI: (0.508;0.532)	0.631; 95% CI: (0.621;0.642)	0.598; 95% CI: (0.58;0.617)	0.516; 95% CI: (0.509;0.54)	0.568; 95% CI: (0.538;0.598)	0.638; 95% CI: (0.627;0.648)	0.509; 95% CI: (0.529;0.546)
NCI_E_cadherin_signaling_in_the_nascent_adherens_junction_Main_Pathway	0.626; 95% CI: (0.608;0.645)	0.63; 95% CI: (0.614;0.645)	0.536; 95% CI: (0.502;0.575)	0.824; 95% CI: (0.797;0.852)	0.692; 95% CI: (0.68;0.705)	0.626; 95% CI: (0.61;0.642)	0.663; 95% CI: (0.641;0.685)	0.515; 95% CI: (0.518;0.548)	0.562; 95% CI: (0.54;0.584)	0.651; 95% CI: (0.636;0.666)	0.619; 95% CI: (0.597;0.642)	0.57; 95% CI: (0.54;0.6)	0.593; 95% CI: (0.56;0.625)	0.687; 95% CI: (0.675;0.699)	0.544; 95% CI: (0.501;0.587)
NCI_EPHA2_forward_signaling_Main_Pathway	0.616; 95% CI: (0.598;0.635)	0.581; 95% CI: (0.567;0.595)	0.54; 95% CI: (0.505;0.576)	0.828; 95% CI: (0.8;0.856)	0.628; 95% CI: (0.616;0.64)	0.611; 95% CI: (0.599;0.623)	0.627; 95% CI: (0.605;0.648)	0.576; 95% CI: (0.553;0.6)	0.549; 95% CI: (0.529;0.569)	0.616; 95% CI: (0.605;0.628)	0.592; 95% CI: (0.573;0.61)	0.52; 95% CI: (0.504;0.543)	0.547; 95% CI: (0.518;0.576)	0.637; 95% CI: (0.629;0.645)	0.507; 95% CI: (0.53;0.543)
NCI_Ephrin_B_reverse_signaling_Main_Pathway	0.603; 95% CI: (0.584;0.621)	0.606; 95% CI: (0.59;0.621)	0.508; 95% CI: (0.527;0.544)	0.798; 95% CI: (0.77;0.827)	0.677; 95% CI: (0.669;0.685)	0.63; 95% CI: (0.617;0.644)	0.655; 95% CI: (0.634;0.677)	0.58; 95% CI: (0.553;0.608)	0.604; 95% CI: (0.582;0.627)	0.643; 95% CI: (0.629;0.656)	0.632; 95% CI: (0.613;0.65)	0.59; 95% CI: (0.56;0.62)	0.584; 95% CI: (0.552;0.615)	0.671; 95% CI: (0.661;0.682)	0.516; 95% CI: (0.525;0.557)
NCI_Ephrin_B_reverse_signaling_Pathway_(cell_adhesion)	0.596; 95% CI: (0.577;0.614)	0.599; 95% CI: (0.583;0.614)	0.51; 95% CI: (0.525;0.545)	0.805; 95% CI: (0.776;0.833)	0.67; 95% CI: (0.662;0.678)	0.626; 95% CI: (0.613;0.64)	0.65; 95% CI: (0.628;0.671)	0.574; 95% CI: (0.547;0.602)	0.594; 95% CI: (0.572;0.615)	0.64; 95% CI: (0.627;0.653)	0.628; 95% CI: (0.61;0.646)	0.59; 95% CI: (0.56;0.62)	0.579; 95% CI: (0.548;0.611)	0.664; 95% CI: (0.653;0.674)	0.511; 95% CI: (0.529;0.551)
NCI_ErbB1_downstream_signaling_Main_Pathway	0.564; 95% CI: (0.546;0.582)	0.655; 95% CI: (0.637;0.673)	0.522; 95% CI: (0.518;0.562)	0.762; 95% CI: (0.734;0.79)	0.721; 95% CI: (0.692;0.75)	0.679; 95% CI: (0.661;0.696)	0.757; 95% CI: (0.734;0.78)	0.607; 95% CI: (0.573;0.642)	0.662; 95% CI: (0.64;0.684)	0.71; 95% CI: (0.692;0.728)	0.701; 95% CI: (0.677;0.726)	0.686; 95% CI: (0.66;0.713)	0.511; 95% CI: (0.524;0.547)	0.534; 95% CI: (0.514;0.555)	0.509; 95% CI: (0.538;0.556)
NCI_ErbB1_downstream_signaling_Pathway_(ruffle_organization)	0.617; 95% CI: (0.599;0.635)	0.574; 95% CI: (0.56;0.588)	0.549; 95% CI: (0.514;0.584)	0.827; 95% CI: (0.8;0.854)	0.628; 95% CI: (0.621;0.635)	0.588; 95% CI: (0.575;0.601)	0.621; 95% CI: (0.6;0.643)	0.58; 95% CI: (0.559;0.601)	0.501; 95% CI: (0.517;0.52)	0.61; 95% CI: (0.599;0.621)	0.592; 95% CI: (0.575;0.609)	0.51; 95% CI: (0.515;0.536)	0.531; 95% CI: (0.503;0.559)	0.631; 95% CI: (0.623;0.638)	0.512; 95% CI: (0.526;0.55)
NCI_ErbB2_ErbB3_signaling_events_Main_Pathway	0.615; 95% CI: (0.596;0.633)	0.631; 95% CI: (0.615;0.646)	0.549; 95% CI: (0.51;0.589)	0.796; 95% CI: (0.769;0.824)	0.657; 95% CI: (0.636;0.677)	0.6; 95% CI: (0.584;0.617)	0.695; 95% CI: (0.673;0.717)	0.578; 95% CI: (0.547;0.609)	0.574; 95% CI: (0.551;0.596)	0.654; 95% CI: (0.64;0.669)	0.619; 95% CI: (0.596;0.642)	0.561; 95% CI: (0.53;0.591)	0.538; 95% CI: (0.506;0.57)	0.682; 95% CI: (0.669;0.695)	0.528; 95% CI: (0.518;0.573)
NCI_ErbB2_ErbB3_signaling_events_Pathway_(myelination)	0.616; 95% CI: (0.598;0.635)	0.594; 95% CI: (0.58;0.608)	0.547; 95% CI: (0.51;0.583)	0.825; 95% CI: (0.797;0.854)	0.647; 95% CI: (0.637;0.657)	0.591; 95% CI: (0.577;0.606)	0.662; 95% CI: (0.64;0.684)	0.59; 95% CI: (0.565;0.614)	0.528; 95% CI: (0.507;0.548)	0.625; 95% CI: (0.612;0.637)	0.606; 95% CI: (0.588;0.625)	0.511; 95% CI: (0.514;0.536)	0.553; 95% CI: (0.522;0.583)	0.644; 95% CI: (0.633;0.655)	0.503; 95% CI: (0.537;0.542)
NCI_ErbB4_signaling_events_Main_Pathway	0.612; 95% CI: (0.593;0.63)	0.627; 95% CI: (0.612;0.642)	0.519; 95% CI: (0.518;0.557)	0.786; 95% CI: (0.757;0.816)	0.678; 95% CI: (0.664;0.692)	0.621; 95% CI: (0.606;0.637)	0.726; 95% CI: (0.704;0.748)	0.61; 95% CI: (0.584;0.636)	0.592; 95% CI: (0.57;0.614)	0.659; 95% CI: (0.645;0.672)	0.633; 95% CI: (0.613;0.652)	0.566; 95% CI: (0.537;0.596)	0.571; 95% CI: (0.539;0.602)	0.683; 95% CI: (0.673;0.694)	0.503; 95% CI: (0.537;0.543)
NCI_ErbB4_signaling_events_Pathway_(apoptosis)	0.602; 95% CI: (0.584;0.621)	0.591; 95% CI: (0.577;0.606)	0.52; 95% CI: (0.515;0.554)	0.823; 95% CI: (0.795;0.851)	0.649; 95% CI: (0.642;0.656)	0.61; 95% CI: (0.597;0.623)	0.69; 95% CI: (0.668;0.711)	0.6; 95% CI: (0.579;0.622)	0.532; 95% CI: (0.512;0.552)	0.631; 95% CI: (0.62;0.642)	0.612; 95% CI: (0.595;0.629)	0.526; 95% CI: (0.5;0.552)	0.565; 95% CI: (0.535;0.594)	0.644; 95% CI: (0.635;0.654)	0.519; 95% CI: (0.517;0.555)
NCI_ErbB4_signaling_events_Pathway_(chemotaxis)	0.602; 95% CI: (0.584;0.621)	0.591; 95% CI: (0.577;0.606)	0.52; 95% CI: (0.515;0.554)	0.823; 95% CI: (0.795;0.851)	0.649; 95% CI: (0.642;0.656)	0.61; 95% CI: (0.597;0.623)	0.69; 95% CI: (0.668;0.711)	0.6; 95% CI: (0.579;0.622)	0.532; 95% CI: (0.512;0.552)	0.631; 95% CI: (0.62;0.642)	0.612; 95% CI: (0.595;0.629)	0.526; 95% CI: (0.5;0.552)	0.565; 95% CI: (0.535;0.594)	0.644; 95% CI: (0.635;0.654)	0.519; 95% CI: (0.517;0.555)
NCI_ErbB4_signaling_events_Pathway_(dendrite_morphogenesis)	0.602; 95% CI: (0.584;0.621)	0.591; 95% CI: (0.577;0.606)	0.52; 95% CI: (0.515;0.554)	0.823; 95% CI: (0.795;0.851)	0.649; 95% CI: (0.642;0.656)	0.61; 95% CI: (0.597;0.623)	0.69; 95% CI: (0.668;0.711)	0.6; 95% CI: (0.579;0.622)	0.532; 95% CI: (0.512;0.552)	0.631; 95% CI: (0.62;0.642)	0.612; 95% CI: (0.595;0.629)	0.526; 95% CI: (0.5;0.552)	0.565; 95% CI: (0.535;0.594)	0.644; 95% CI: (0.635;0.654)	0.519; 95% CI: (0.517;0.555)
NCI_FAS_CD95_signaling_Main_Pathway	0.632; 95% CI: (0.613;0.65)	0.595; 95% CI: (0.58;0.611)	0.553; 95% CI: (0.514;0.591)	0.807; 95% CI: (0.779;0.835)	0.659; 95% CI: (0.645;0.674)	0.613; 95% CI: (0.598;0.628)	0.646; 95% CI: (0.623;0.668)	0.588; 95% CI: (0.56;0.615)	0.559; 95% CI: (0.537;0.581)	0.646; 95% CI: (0.633;0.659)	0.624; 95% CI: (0.606;0.643)	0.552; 95% CI: (0.523;0.581)	0.533; 95% CI: (0.502;0.564)	0.666; 95% CI: (0.655;0.676)	0.552; 95% CI: (0.508;0.597)
NCI_Fc_epsilon_receptor_I_signaling_in_mast_cells_Main_Pathway	0.639; 95% CI: (0.621;0.657)	0.649; 95% CI: (0.633;0.665)	0.511; 95% CI: (0.527;0.549)	0.775; 95% CI: (0.749;0.802)	0.7; 95% CI: (0.682;0.718)	0.66; 95% CI: (0.644;0.676)	0.702; 95% CI: (0.681;0.724)	0.594; 95% CI: (0.563;0.625)	0.646; 95% CI: (0.623;0.669)	0.676; 95% CI: (0.661;0.692)	0.641; 95% CI: (0.616;0.665)	0.634; 95% CI: (0.603;0.664)	0.54; 95% CI: (0.507;0.574)	0.693; 95% CI: (0.676;0.711)	0.539; 95% CI: (0.506;0.584)
NCI_Fc_epsilon_receptor_I_signaling_in_mast_cells_Pathway_(regulation_of_mast_cell_degranulation)	0.625; 95% CI: (0.607;0.643)	0.559; 95% CI: (0.545;0.573)	0.551; 95% CI: (0.517;0.586)	0.838; 95% CI: (0.811;0.865)	0.598; 95% CI: (0.584;0.612)	0.598; 95% CI: (0.587;0.608)	0.597; 95% CI: (0.576;0.618)	0.586; 95% CI: (0.568;0.604)	0.506; 95% CI: (0.513;0.524)	0.609; 95% CI: (0.599;0.618)	0.584; 95% CI: (0.568;0.6)	0.508; 95% CI: (0.515;0.532)	0.516; 95% CI: (0.51;0.543)	0.615; 95% CI: (0.606;0.624)	0.521; 95% CI: (0.512;0.554)
NCI_Glucocorticoid_receptor_regulatory_network_Main_Pathway	0.532; 95% CI: (0.512;0.553)	0.532; 95% CI: (0.509;0.556)	0.588; 95% CI: (0.556;0.62)	0.573; 95% CI: (0.54;0.607)	0.719; 95% CI: (0.696;0.742)	0.702; 95% CI: (0.688;0.716)	0.732; 95% CI: (0.711;0.754)	0.515; 95% CI: (0.523;0.552)	0.701; 95% CI: (0.68;0.723)	0.575; 95% CI: (0.555;0.596)	0.686; 95% CI: (0.662;0.711)	0.506; 95% CI: (0.521;0.534)	0.571; 95% CI: (0.539;0.603)	0.77; 95% CI: (0.76;0.78)	0.543; 95% CI: (0.503;0.583)
NCI_IFN_gamma_Main_Pathway	0.637; 95% CI: (0.618;0.655)	0.616; 95% CI: (0.599;0.632)	0.563; 95% CI: (0.525;0.601)	0.811; 95% CI: (0.783;0.839)	0.663; 95% CI: (0.644;0.682)	0.605; 95% CI: (0.588;0.622)	0.677; 95% CI: (0.655;0.699)	0.587; 95% CI: (0.558;0.616)	0.576; 95% CI: (0.554;0.598)	0.663; 95% CI: (0.649;0.677)	0.628; 95% CI: (0.606;0.65)	0.543; 95% CI: (0.513;0.572)	0.521; 95% CI: (0.512;0.553)	0.688; 95% CI: (0.676;0.7)	0.541; 95% CI: (0.504;0.585)
NCI_IFN_gamma_Pathway_(Antibacterial_Response)	0.616; 95% CI: (0.598;0.634)	0.578; 95% CI: (0.563;0.592)	0.552; 95% CI: (0.516;0.587)	0.821; 95% CI: (0.793;0.849)	0.629; 95% CI: (0.619;0.639)	0.591; 95% CI: (0.577;0.604)	0.636; 95% CI: (0.614;0.658)	0.578; 95% CI: (0.555;0.6)	0.53; 95% CI: (0.511;0.55)	0.622; 95% CI: (0.612;0.632)	0.599; 95% CI: (0.582;0.616)	0.519; 95% CI: (0.504;0.543)	0.526; 95% CI: (0.502;0.554)	0.63; 95% CI: (0.621;0.639)	0.502; 95% CI: (0.535;0.54)
NCI_IFN_gamma_Pathway_(antigen_processing_and_presentation_of_peptide_antigen_via_MHC_class_I)	0.616; 95% CI: (0.598;0.634)	0.578; 95% CI: (0.563;0.592)	0.552; 95% CI: (0.516;0.587)	0.821; 95% CI: (0.793;0.849)	0.629; 95% CI: (0.619;0.639)	0.591; 95% CI: (0.577;0.604)	0.636; 95% CI: (0.614;0.658)	0.578; 95% CI: (0.555;0.6)	0.53; 95% CI: (0.511;0.55)	0.622; 95% CI: (0.612;0.632)	0.599; 95% CI: (0.582;0.616)	0.519; 95% CI: (0.504;0.543)	0.526; 95% CI: (0.502;0.554)	0.63; 95% CI: (0.621;0.639)	0.502; 95% CI: (0.535;0.54)
NCI_IFN_gamma_Pathway_(antigen_processing_and_presentation_of_peptide_antigen_via_MHC_class_II)	0.616; 95% CI: (0.598;0.634)	0.578; 95% CI: (0.563;0.592)	0.552; 95% CI: (0.516;0.587)	0.821; 95% CI: (0.793;0.849)	0.629; 95% CI: (0.619;0.639)	0.591; 95% CI: (0.577;0.604)	0.636; 95% CI: (0.614;0.658)	0.578; 95% CI: (0.555;0.6)	0.53; 95% CI: (0.511;0.55)	0.622; 95% CI: (0.612;0.632)	0.599; 95% CI: (0.582;0.616)	0.519; 95% CI: (0.504;0.543)	0.526; 95% CI: (0.502;0.554)	0.63; 95% CI: (0.621;0.639)	0.502; 95% CI: (0.535;0.54)
NCI_IFN_gamma_Pathway_(Antiviral_Response)	0.616; 95% CI: (0.598;0.634)	0.578; 95% CI: (0.563;0.592)	0.552; 95% CI: (0.516;0.587)	0.821; 95% CI: (0.793;0.849)	0.629; 95% CI: (0.619;0.639)	0.591; 95% CI: (0.577;0.604)	0.636; 95% CI: (0.614;0.658)	0.578; 95% CI: (0.555;0.6)	0.53; 95% CI: (0.511;0.55)	0.622; 95% CI: (0.612;0.632)	0.599; 95% CI: (0.582;0.616)	0.519; 95% CI: (0.504;0.543)	0.526; 95% CI: (0.502;0.554)	0.63; 95% CI: (0.621;0.639)	0.502; 95% CI: (0.535;0.54)
NCI_IFN_gamma_Pathway_(apoptosis)	0.616; 95% CI: (0.598;0.634)	0.578; 95% CI: (0.563;0.592)	0.552; 95% CI: (0.516;0.587)	0.821; 95% CI: (0.793;0.849)	0.629; 95% CI: (0.619;0.639)	0.591; 95% CI: (0.577;0.604)	0.636; 95% CI: (0.614;0.658)	0.578; 95% CI: (0.555;0.6)	0.53; 95% CI: (0.511;0.55)	0.622; 95% CI: (0.612;0.632)	0.599; 95% CI: (0.582;0.616)	0.519; 95% CI: (0.504;0.543)	0.526; 95% CI: (0.502;0.554)	0.63; 95% CI: (0.621;0.639)	0.502; 95% CI: (0.535;0.54)
NCI_IFN_gamma_Pathway_(Immunoregulation)	0.616; 95% CI: (0.598;0.634)	0.578; 95% CI: (0.563;0.592)	0.552; 95% CI: (0.516;0.587)	0.821; 95% CI: (0.793;0.849)	0.629; 95% CI: (0.619;0.639)	0.591; 95% CI: (0.577;0.604)	0.636; 95% CI: (0.614;0.658)	0.578; 95% CI: (0.555;0.6)	0.53; 95% CI: (0.511;0.55)	0.622; 95% CI: (0.612;0.632)	0.599; 95% CI: (0.582;0.616)	0.519; 95% CI: (0.504;0.543)	0.526; 95% CI: (0.502;0.554)	0.63; 95% CI: (0.621;0.639)	0.502; 95% CI: (0.535;0.54)
NCI_IFN_gamma_Pathway_(negative_regulation_of_cell_growth)	0.616; 95% CI: (0.598;0.634)	0.578; 95% CI: (0.563;0.592)	0.552; 95% CI: (0.516;0.587)	0.821; 95% CI: (0.793;0.849)	0.629; 95% CI: (0.619;0.639)	0.591; 95% CI: (0.577;0.604)	0.636; 95% CI: (0.614;0.658)	0.578; 95% CI: (0.555;0.6)	0.53; 95% CI: (0.511;0.55)	0.622; 95% CI: (0.612;0.632)	0.599; 95% CI: (0.582;0.616)	0.519; 95% CI: (0.504;0.543)	0.526; 95% CI: (0.502;0.554)	0.63; 95% CI: (0.621;0.639)	0.502; 95% CI: (0.535;0.54)
NCI_IGF1_Main_Pathway	0.609; 95% CI: (0.591;0.628)	0.59; 95% CI: (0.575;0.605)	0.538; 95% CI: (0.502;0.574)	0.815; 95% CI: (0.788;0.842)	0.635; 95% CI: (0.617;0.653)	0.61; 95% CI: (0.595;0.625)	0.649; 95% CI: (0.627;0.671)	0.586; 95% CI: (0.561;0.612)	0.548; 95% CI: (0.526;0.569)	0.639; 95% CI: (0.627;0.652)	0.6; 95% CI: (0.579;0.622)	0.538; 95% CI: (0.51;0.567)	0.54; 95% CI: (0.509;0.571)	0.633; 95% CI: (0.618;0.649)	0.503; 95% CI: (0.537;0.542)
NCI_IL2_mediated_signaling_events_Main_Pathway	0.56; 95% CI: (0.543;0.578)	0.65; 95% CI: (0.635;0.666)	0.513; 95% CI: (0.523;0.548)	0.764; 95% CI: (0.735;0.794)	0.636; 95% CI: (0.608;0.665)	0.658; 95% CI: (0.642;0.673)	0.764; 95% CI: (0.742;0.786)	0.591; 95% CI: (0.56;0.622)	0.657; 95% CI: (0.634;0.679)	0.676; 95% CI: (0.66;0.691)	0.655; 95% CI: (0.634;0.676)	0.618; 95% CI: (0.587;0.648)	0.541; 95% CI: (0.508;0.573)	0.649; 95% CI: (0.628;0.669)	0.512; 95% CI: (0.528;0.552)
NCI_IL2_mediated_signaling_events_Pathway_(natural_killer_cell_mediated_cytotoxicity)	0.623; 95% CI: (0.604;0.641)	0.585; 95% CI: (0.57;0.6)	0.538; 95% CI: (0.503;0.573)	0.815; 95% CI: (0.788;0.843)	0.618; 95% CI: (0.6;0.636)	0.615; 95% CI: (0.602;0.628)	0.636; 95% CI: (0.614;0.658)	0.584; 95% CI: (0.559;0.608)	0.551; 95% CI: (0.53;0.573)	0.626; 95% CI: (0.614;0.638)	0.599; 95% CI: (0.579;0.618)	0.534; 95% CI: (0.506;0.562)	0.517; 95% CI: (0.512;0.546)	0.647; 95% CI: (0.636;0.657)	0.511; 95% CI: (0.527;0.549)
NCI_IL2_signaling_events_mediated_by_PI3K_Main_Pathway	0.629; 95% CI: (0.61;0.648)	0.611; 95% CI: (0.595;0.627)	0.516; 95% CI: (0.521;0.552)	0.807; 95% CI: (0.78;0.835)	0.654; 95% CI: (0.636;0.672)	0.612; 95% CI: (0.597;0.627)	0.671; 95% CI: (0.648;0.693)	0.584; 95% CI: (0.556;0.612)	0.585; 95% CI: (0.563;0.608)	0.645; 95% CI: (0.631;0.66)	0.618; 95% CI: (0.596;0.64)	0.556; 95% CI: (0.526;0.586)	0.512; 95% CI: (0.518;0.543)	0.677; 95% CI: (0.665;0.689)	0.514; 95% CI: (0.528;0.557)
NCI_IL2_signaling_events_mediated_by_PI3K_Pathway_(actin_cytoskeleton_organization)	0.627; 95% CI: (0.608;0.645)	0.578; 95% CI: (0.563;0.593)	0.528; 95% CI: (0.506;0.563)	0.82; 95% CI: (0.792;0.848)	0.611; 95% CI: (0.594;0.629)	0.608; 95% CI: (0.595;0.62)	0.625; 95% CI: (0.604;0.647)	0.58; 95% CI: (0.556;0.603)	0.545; 95% CI: (0.524;0.566)	0.618; 95% CI: (0.606;0.63)	0.595; 95% CI: (0.576;0.614)	0.503; 95% CI: (0.522;0.529)	0.517; 95% CI: (0.512;0.545)	0.64; 95% CI: (0.63;0.649)	0.511; 95% CI: (0.525;0.548)
NCI_IL2_signaling_events_mediated_by_PI3K_Pathway_(cell_proliferation)	0.625; 95% CI: (0.607;0.643)	0.582; 95% CI: (0.567;0.596)	0.524; 95% CI: (0.511;0.558)	0.817; 95% CI: (0.789;0.845)	0.612; 95% CI: (0.594;0.63)	0.611; 95% CI: (0.599;0.624)	0.633; 95% CI: (0.612;0.655)	0.583; 95% CI: (0.559;0.606)	0.548; 95% CI: (0.527;0.569)	0.619; 95% CI: (0.607;0.632)	0.598; 95% CI: (0.579;0.617)	0.518; 95% CI: (0.509;0.545)	0.515; 95% CI: (0.513;0.543)	0.643; 95% CI: (0.633;0.652)	0.514; 95% CI: (0.523;0.55)
NCI_IL2_signaling_events_mediated_by_PI3K_Pathway_(cell_survival)	0.632; 95% CI: (0.614;0.651)	0.578; 95% CI: (0.563;0.593)	0.523; 95% CI: (0.511;0.558)	0.822; 95% CI: (0.795;0.849)	0.62; 95% CI: (0.603;0.638)	0.614; 95% CI: (0.601;0.627)	0.636; 95% CI: (0.614;0.658)	0.583; 95% CI: (0.559;0.608)	0.547; 95% CI: (0.526;0.568)	0.626; 95% CI: (0.614;0.638)	0.597; 95% CI: (0.578;0.617)	0.512; 95% CI: (0.516;0.539)	0.514; 95% CI: (0.515;0.542)	0.644; 95% CI: (0.633;0.654)	0.523; 95% CI: (0.513;0.56)
NCI_IL2_signaling_events_mediated_by_PI3K_Pathway_(T_cell_proliferation)	0.627; 95% CI: (0.608;0.645)	0.578; 95% CI: (0.563;0.593)	0.528; 95% CI: (0.506;0.563)	0.82; 95% CI: (0.792;0.848)	0.611; 95% CI: (0.594;0.629)	0.608; 95% CI: (0.595;0.62)	0.625; 95% CI: (0.604;0.647)	0.58; 95% CI: (0.556;0.603)	0.545; 95% CI: (0.524;0.566)	0.618; 95% CI: (0.606;0.63)	0.595; 95% CI: (0.576;0.614)	0.503; 95% CI: (0.522;0.529)	0.517; 95% CI: (0.512;0.545)	0.64; 95% CI: (0.63;0.649)	0.511; 95% CI: (0.525;0.548)
NCI_IL23_mediated_signaling_events_Main_Pathway	0.6; 95% CI: (0.582;0.618)	0.595; 95% CI: (0.579;0.611)	0.542; 95% CI: (0.505;0.579)	0.808; 95% CI: (0.781;0.836)	0.671; 95% CI: (0.661;0.68)	0.622; 95% CI: (0.608;0.636)	0.634; 95% CI: (0.612;0.656)	0.554; 95% CI: (0.523;0.585)	0.592; 95% CI: (0.57;0.614)	0.641; 95% CI: (0.628;0.655)	0.609; 95% CI: (0.588;0.629)	0.585; 95% CI: (0.556;0.615)	0.532; 95% CI: (0.502;0.563)	0.666; 95% CI: (0.656;0.677)	0.533; 95% CI: (0.509;0.575)
NCI_IL5_mediated_signaling_events_Main_Pathway	0.611; 95% CI: (0.593;0.629)	0.561; 95% CI: (0.546;0.575)	0.546; 95% CI: (0.511;0.581)	0.834; 95% CI: (0.806;0.862)	0.601; 95% CI: (0.586;0.617)	0.596; 95% CI: (0.584;0.608)	0.606; 95% CI: (0.585;0.627)	0.587; 95% CI: (0.567;0.607)	0.519; 95% CI: (0.5;0.538)	0.611; 95% CI: (0.601;0.622)	0.594; 95% CI: (0.578;0.61)	0.511; 95% CI: (0.513;0.536)	0.519; 95% CI: (0.508;0.546)	0.622; 95% CI: (0.614;0.631)	0.524; 95% CI: (0.509;0.557)
NCI_IL6_mediated_signaling_events_Main_Pathway	0.623; 95% CI: (0.605;0.641)	0.615; 95% CI: (0.599;0.63)	0.522; 95% CI: (0.514;0.558)	0.801; 95% CI: (0.774;0.829)	0.66; 95% CI: (0.643;0.676)	0.613; 95% CI: (0.597;0.629)	0.674; 95% CI: (0.652;0.696)	0.581; 95% CI: (0.553;0.609)	0.572; 95% CI: (0.55;0.595)	0.646; 95% CI: (0.631;0.66)	0.624; 95% CI: (0.603;0.645)	0.567; 95% CI: (0.536;0.597)	0.542; 95% CI: (0.51;0.573)	0.674; 95% CI: (0.663;0.686)	0.526; 95% CI: (0.518;0.57)
NCI_Insulin_Pathway_Main_Pathway	0.614; 95% CI: (0.596;0.633)	0.619; 95% CI: (0.602;0.635)	0.505; 95% CI: (0.532;0.541)	0.803; 95% CI: (0.776;0.83)	0.673; 95% CI: (0.654;0.691)	0.638; 95% CI: (0.622;0.654)	0.684; 95% CI: (0.662;0.706)	0.59; 95% CI: (0.56;0.619)	0.613; 95% CI: (0.59;0.635)	0.649; 95% CI: (0.633;0.664)	0.621; 95% CI: (0.597;0.645)	0.56; 95% CI: (0.53;0.59)	0.534; 95% CI: (0.501;0.566)	0.664; 95% CI: (0.647;0.682)	0.551; 95% CI: (0.507;0.595)
NCI_Integrins_in_angiogenesis_Main_Pathway	0.595; 95% CI: (0.577;0.613)	0.651; 95% CI: (0.633;0.67)	0.521; 95% CI: (0.519;0.561)	0.767; 95% CI: (0.739;0.796)	0.755; 95% CI: (0.736;0.774)	0.658; 95% CI: (0.64;0.676)	0.722; 95% CI: (0.701;0.743)	0.583; 95% CI: (0.551;0.615)	0.691; 95% CI: (0.67;0.712)	0.681; 95% CI: (0.663;0.699)	0.685; 95% CI: (0.661;0.709)	0.708; 95% CI: (0.679;0.737)	0.596; 95% CI: (0.562;0.629)	0.762; 95% CI: (0.747;0.777)	0.576; 95% CI: (0.533;0.62)
NCI_Internalization_of_ErbB1_Main_Pathway	0.557; 95% CI: (0.539;0.575)	0.602; 95% CI: (0.585;0.619)	0.517; 95% CI: (0.52;0.554)	0.771; 95% CI: (0.743;0.8)	0.652; 95% CI: (0.624;0.68)	0.661; 95% CI: (0.646;0.677)	0.769; 95% CI: (0.748;0.791)	0.594; 95% CI: (0.563;0.624)	0.658; 95% CI: (0.636;0.68)	0.684; 95% CI: (0.669;0.698)	0.659; 95% CI: (0.638;0.681)	0.601; 95% CI: (0.571;0.631)	0.516; 95% CI: (0.516;0.547)	0.652; 95% CI: (0.631;0.672)	0.507; 95% CI: (0.534;0.548)
NCI_LKB1_signaling_events_Main_Pathway	0.529; 95% CI: (0.509;0.549)	0.528; 95% CI: (0.505;0.551)	0.609; 95% CI: (0.577;0.64)	0.556; 95% CI: (0.523;0.589)	0.715; 95% CI: (0.693;0.737)	0.696; 95% CI: (0.682;0.711)	0.742; 95% CI: (0.722;0.763)	0.519; 95% CI: (0.52;0.557)	0.711; 95% CI: (0.69;0.732)	0.597; 95% CI: (0.577;0.617)	0.687; 95% CI: (0.664;0.71)	0.547; 95% CI: (0.521;0.574)	0.583; 95% CI: (0.551;0.615)	0.762; 95% CI: (0.752;0.771)	0.509; 95% CI: (0.53;0.548)
NCI_mTOR_signaling_Main_Pathway	0.527; 95% CI: (0.509;0.545)	0.684; 95% CI: (0.67;0.698)	0.516; 95% CI: (0.522;0.554)	0.603; 95% CI: (0.564;0.642)	0.662; 95% CI: (0.634;0.69)	0.631; 95% CI: (0.614;0.648)	0.764; 95% CI: (0.741;0.786)	0.588; 95% CI: (0.555;0.62)	0.65; 95% CI: (0.627;0.673)	0.672; 95% CI: (0.656;0.688)	0.648; 95% CI: (0.625;0.671)	0.723; 95% CI: (0.701;0.746)	0.54; 95% CI: (0.506;0.574)	0.566; 95% CI: (0.545;0.587)	0.509; 95% CI: (0.534;0.553)
NCI_N_cadherin_signaling_events_Main_Pathway	0.587; 95% CI: (0.569;0.605)	0.633; 95% CI: (0.618;0.649)	0.526; 95% CI: (0.511;0.564)	0.818; 95% CI: (0.792;0.844)	0.675; 95% CI: (0.658;0.692)	0.632; 95% CI: (0.616;0.647)	0.679; 95% CI: (0.657;0.701)	0.528; 95% CI: (0.504;0.561)	0.598; 95% CI: (0.575;0.621)	0.651; 95% CI: (0.636;0.666)	0.617; 95% CI: (0.594;0.64)	0.608; 95% CI: (0.578;0.639)	0.586; 95% CI: (0.553;0.62)	0.693; 95% CI: (0.682;0.705)	0.533; 95% CI: (0.511;0.577)
NCI_N_cadherin_signaling_events_Pathway_(actin_filament_polymerization)	0.601; 95% CI: (0.583;0.619)	0.586; 95% CI: (0.572;0.6)	0.553; 95% CI: (0.516;0.589)	0.851; 95% CI: (0.824;0.877)	0.642; 95% CI: (0.636;0.648)	0.607; 95% CI: (0.595;0.619)	0.628; 95% CI: (0.606;0.649)	0.5; 95% CI: (0.529;0.53)	0.522; 95% CI: (0.502;0.541)	0.62; 95% CI: (0.609;0.631)	0.579; 95% CI: (0.559;0.6)	0.509; 95% CI: (0.517;0.535)	0.548; 95% CI: (0.518;0.577)	0.64; 95% CI: (0.631;0.648)	0.52; 95% CI: (0.515;0.555)
NCI_N_cadherin_signaling_events_Pathway_(regulation_of_cell_cell_adhesion)	0.599; 95% CI: (0.581;0.618)	0.593; 95% CI: (0.578;0.607)	0.549; 95% CI: (0.513;0.586)	0.847; 95% CI: (0.821;0.873)	0.651; 95% CI: (0.645;0.657)	0.615; 95% CI: (0.603;0.628)	0.646; 95% CI: (0.625;0.668)	0.506; 95% CI: (0.525;0.536)	0.54; 95% CI: (0.52;0.561)	0.628; 95% CI: (0.617;0.64)	0.587; 95% CI: (0.567;0.608)	0.51; 95% CI: (0.517;0.536)	0.546; 95% CI: (0.516;0.576)	0.648; 95% CI: (0.639;0.657)	0.5; 95% CI: (0.537;0.538)
NCI_Nectin_adhesion_Main_Pathway	0.622; 95% CI: (0.603;0.64)	0.615; 95% CI: (0.599;0.631)	0.529; 95% CI: (0.509;0.566)	0.814; 95% CI: (0.786;0.842)	0.684; 95% CI: (0.67;0.698)	0.62; 95% CI: (0.604;0.636)	0.663; 95% CI: (0.641;0.685)	0.514; 95% CI: (0.519;0.547)	0.573; 95% CI: (0.551;0.595)	0.668; 95% CI: (0.655;0.68)	0.627; 95% CI: (0.605;0.649)	0.568; 95% CI: (0.538;0.599)	0.573; 95% CI: (0.541;0.605)	0.689; 95% CI: (0.678;0.701)	0.525; 95% CI: (0.518;0.567)
NCI_Nephrin_Neph1_signaling_in_the_kidney_podocyte_Main_Pathway	0.61; 95% CI: (0.591;0.628)	0.605; 95% CI: (0.59;0.62)	0.531; 95% CI: (0.506;0.568)	0.805; 95% CI: (0.777;0.833)	0.669; 95% CI: (0.658;0.68)	0.63; 95% CI: (0.616;0.644)	0.668; 95% CI: (0.647;0.69)	0.6; 95% CI: (0.575;0.625)	0.578; 95% CI: (0.555;0.6)	0.645; 95% CI: (0.632;0.658)	0.597; 95% CI: (0.574;0.619)	0.573; 95% CI: (0.544;0.602)	0.548; 95% CI: (0.517;0.58)	0.664; 95% CI: (0.653;0.675)	0.533; 95% CI: (0.511;0.576)
NCI_Neurotrophic_factor_mediated_Trk_receptor_signaling_Main_Pathway	0.556; 95% CI: (0.539;0.573)	0.669; 95% CI: (0.654;0.684)	0.513; 95% CI: (0.525;0.551)	0.768; 95% CI: (0.739;0.796)	0.647; 95% CI: (0.618;0.676)	0.666; 95% CI: (0.651;0.682)	0.769; 95% CI: (0.748;0.791)	0.596; 95% CI: (0.564;0.627)	0.672; 95% CI: (0.649;0.694)	0.682; 95% CI: (0.667;0.697)	0.656; 95% CI: (0.634;0.678)	0.65; 95% CI: (0.62;0.68)	0.556; 95% CI: (0.523;0.588)	0.661; 95% CI: (0.64;0.682)	0.534; 95% CI: (0.506;0.575)
NCI_Neurotrophic_factor_mediated_Trk_receptor_signaling_Pathway_(MAPKKK_cascade)	0.609; 95% CI: (0.591;0.626)	0.565; 95% CI: (0.551;0.579)	0.551; 95% CI: (0.516;0.586)	0.83; 95% CI: (0.802;0.857)	0.624; 95% CI: (0.618;0.629)	0.589; 95% CI: (0.577;0.601)	0.598; 95% CI: (0.577;0.619)	0.584; 95% CI: (0.565;0.604)	0.517; 95% CI: (0.502;0.536)	0.608; 95% CI: (0.598;0.618)	0.585; 95% CI: (0.568;0.602)	0.504; 95% CI: (0.521;0.529)	0.529; 95% CI: (0.501;0.556)	0.621; 95% CI: (0.613;0.629)	0.514; 95% CI: (0.523;0.551)
NCI_Neurotrophic_factor_mediated_Trk_receptor_signaling_Pathway_(neuron_projection_morphogenesis)	0.55; 95% CI: (0.533;0.567)	0.641; 95% CI: (0.626;0.655)	0.501; 95% CI: (0.535;0.537)	0.787; 95% CI: (0.759;0.815)	0.635; 95% CI: (0.608;0.661)	0.654; 95% CI: (0.641;0.668)	0.759; 95% CI: (0.738;0.781)	0.61; 95% CI: (0.583;0.637)	0.634; 95% CI: (0.611;0.656)	0.663; 95% CI: (0.65;0.677)	0.645; 95% CI: (0.626;0.665)	0.618; 95% CI: (0.588;0.648)	0.547; 95% CI: (0.516;0.579)	0.633; 95% CI: (0.614;0.653)	0.501; 95% CI: (0.539;0.54)
NCI_Neurotrophic_factor_mediated_Trk_receptor_signaling_Pathway_(Schwann_cell_development)	0.541; 95% CI: (0.527;0.556)	0.637; 95% CI: (0.627;0.647)	0.52; 95% CI: (0.512;0.551)	0.598; 95% CI: (0.564;0.633)	0.583; 95% CI: (0.558;0.608)	0.616; 95% CI: (0.604;0.628)	0.769; 95% CI: (0.749;0.79)	0.573; 95% CI: (0.547;0.599)	0.649; 95% CI: (0.627;0.671)	0.617; 95% CI: (0.604;0.63)	0.618; 95% CI: (0.602;0.634)	0.649; 95% CI: (0.621;0.677)	0.55; 95% CI: (0.521;0.58)	0.579; 95% CI: (0.561;0.598)	0.513; 95% CI: (0.525;0.551)
NCI_Nongenotropic_Androgen_signaling_Main_Pathway	0.591; 95% CI: (0.572;0.609)	0.599; 95% CI: (0.584;0.614)	0.566; 95% CI: (0.529;0.603)	0.791; 95% CI: (0.762;0.82)	0.664; 95% CI: (0.652;0.677)	0.624; 95% CI: (0.61;0.638)	0.665; 95% CI: (0.643;0.687)	0.583; 95% CI: (0.555;0.61)	0.569; 95% CI: (0.548;0.591)	0.649; 95% CI: (0.637;0.662)	0.614; 95% CI: (0.592;0.635)	0.601; 95% CI: (0.571;0.631)	0.536; 95% CI: (0.505;0.567)	0.646; 95% CI: (0.632;0.661)	0.534; 95% CI: (0.508;0.576)
NCI_Osteopontin_mediated_events_Main_Pathway	0.606; 95% CI: (0.587;0.624)	0.598; 95% CI: (0.582;0.613)	0.552; 95% CI: (0.514;0.59)	0.797; 95% CI: (0.769;0.825)	0.669; 95% CI: (0.657;0.682)	0.614; 95% CI: (0.599;0.629)	0.645; 95% CI: (0.623;0.667)	0.563; 95% CI: (0.533;0.593)	0.573; 95% CI: (0.551;0.595)	0.639; 95% CI: (0.625;0.653)	0.629; 95% CI: (0.609;0.648)	0.568; 95% CI: (0.538;0.599)	0.558; 95% CI: (0.526;0.59)	0.667; 95% CI: (0.656;0.678)	0.549; 95% CI: (0.506;0.592)
NCI_p53_Main_Pathway	0.53; 95% CI: (0.509;0.551)	0.523; 95% CI: (0.5;0.546)	0.637; 95% CI: (0.608;0.667)	0.567; 95% CI: (0.535;0.6)	0.722; 95% CI: (0.699;0.745)	0.707; 95% CI: (0.692;0.721)	0.73; 95% CI: (0.709;0.752)	0.545; 95% CI: (0.506;0.583)	0.688; 95% CI: (0.666;0.71)	0.596; 95% CI: (0.575;0.616)	0.671; 95% CI: (0.647;0.696)	0.538; 95% CI: (0.512;0.564)	0.563; 95% CI: (0.531;0.595)	0.761; 95% CI: (0.751;0.772)	0.517; 95% CI: (0.523;0.558)
NCI_p53_Pathway_(apoptosis)	0.53; 95% CI: (0.509;0.551)	0.526; 95% CI: (0.502;0.549)	0.636; 95% CI: (0.606;0.666)	0.567; 95% CI: (0.534;0.6)	0.722; 95% CI: (0.699;0.745)	0.708; 95% CI: (0.693;0.722)	0.729; 95% CI: (0.708;0.75)	0.543; 95% CI: (0.505;0.581)	0.687; 95% CI: (0.664;0.709)	0.599; 95% CI: (0.578;0.62)	0.672; 95% CI: (0.648;0.697)	0.541; 95% CI: (0.515;0.567)	0.562; 95% CI: (0.53;0.594)	0.762; 95% CI: (0.751;0.772)	0.517; 95% CI: (0.523;0.558)
NCI_p75_NTR_mediated_signaling_Main_Pathway	0.578; 95% CI: (0.559;0.597)	0.53; 95% CI: (0.507;0.554)	0.601; 95% CI: (0.567;0.634)	0.695; 95% CI: (0.671;0.72)	0.741; 95% CI: (0.718;0.764)	0.733; 95% CI: (0.719;0.746)	0.741; 95% CI: (0.72;0.762)	0.568; 95% CI: (0.529;0.607)	0.677; 95% CI: (0.654;0.7)	0.563; 95% CI: (0.542;0.583)	0.699; 95% CI: (0.675;0.723)	0.525; 95% CI: (0.504;0.554)	0.603; 95% CI: (0.572;0.635)	0.78; 95% CI: (0.769;0.791)	0.517; 95% CI: (0.526;0.561)
NCI_PAR1_mediated_thrombin_signaling_events_Main_Pathway	0.603; 95% CI: (0.584;0.621)	0.64; 95% CI: (0.624;0.655)	0.524; 95% CI: (0.513;0.561)	0.776; 95% CI: (0.748;0.804)	0.699; 95% CI: (0.685;0.713)	0.635; 95% CI: (0.619;0.651)	0.704; 95% CI: (0.682;0.726)	0.601; 95% CI: (0.573;0.63)	0.636; 95% CI: (0.614;0.658)	0.653; 95% CI: (0.638;0.669)	0.631; 95% CI: (0.609;0.654)	0.616; 95% CI: (0.586;0.646)	0.564; 95% CI: (0.531;0.597)	0.71; 95% CI: (0.7;0.721)	0.557; 95% CI: (0.514;0.601)
NCI_PDGFR_alpha_signaling_Main_Pathway	0.613; 95% CI: (0.595;0.632)	0.561; 95% CI: (0.545;0.577)	0.528; 95% CI: (0.507;0.564)	0.816; 95% CI: (0.788;0.844)	0.639; 95% CI: (0.626;0.651)	0.605; 95% CI: (0.591;0.619)	0.631; 95% CI: (0.609;0.653)	0.577; 95% CI: (0.552;0.602)	0.544; 95% CI: (0.524;0.564)	0.622; 95% CI: (0.61;0.635)	0.596; 95% CI: (0.576;0.616)	0.504; 95% CI: (0.522;0.53)	0.525; 95% CI: (0.504;0.554)	0.646; 95% CI: (0.637;0.655)	0.508; 95% CI: (0.531;0.546)
NCI_PDGFR_beta_signaling_Main_Pathway	0.554; 95% CI: (0.536;0.572)	0.673; 95% CI: (0.656;0.691)	0.507; 95% CI: (0.532;0.547)	0.786; 95% CI: (0.759;0.813)	0.729; 95% CI: (0.699;0.76)	0.674; 95% CI: (0.655;0.692)	0.769; 95% CI: (0.747;0.791)	0.605; 95% CI: (0.57;0.64)	0.672; 95% CI: (0.65;0.694)	0.733; 95% CI: (0.716;0.751)	0.706; 95% CI: (0.68;0.732)	0.717; 95% CI: (0.691;0.742)	0.572; 95% CI: (0.537;0.608)	0.593; 95% CI: (0.573;0.613)	0.564; 95% CI: (0.522;0.607)
NCI_PDGFR_beta_signaling_Pathway_(receptor_recycling)	0.618; 95% CI: (0.599;0.636)	0.51; 95% CI: (0.509;0.528)	0.539; 95% CI: (0.503;0.576)	0.88; 95% CI: (0.853;0.906)	0.651; 95% CI: (0.643;0.659)	0.607; 95% CI: (0.593;0.621)	0.613; 95% CI: (0.592;0.635)	0.605; 95% CI: (0.584;0.627)	0.509; 95% CI: (0.51;0.528)	0.632; 95% CI: (0.62;0.643)	0.604; 95% CI: (0.585;0.623)	0.501; 95% CI: (0.524;0.526)	0.522; 95% CI: (0.507;0.55)	0.651; 95% CI: (0.642;0.66)	0.523; 95% CI: (0.512;0.559)
NCI_PDGFR_beta_signaling_Pathway_(ruffle_organization)	0.6; 95% CI: (0.582;0.618)	0.538; 95% CI: (0.52;0.556)	0.551; 95% CI: (0.514;0.588)	0.863; 95% CI: (0.837;0.889)	0.667; 95% CI: (0.657;0.677)	0.604; 95% CI: (0.589;0.62)	0.629; 95% CI: (0.607;0.651)	0.601; 95% CI: (0.576;0.626)	0.532; 95% CI: (0.511;0.553)	0.644; 95% CI: (0.631;0.656)	0.614; 95% CI: (0.594;0.634)	0.547; 95% CI: (0.518;0.576)	0.541; 95% CI: (0.51;0.572)	0.668; 95% CI: (0.658;0.678)	0.513; 95% CI: (0.526;0.553)
NCI_Plasma_membrane_estrogen_receptor_signaling_Main_Pathway	0.552; 95% CI: (0.535;0.57)	0.65; 95% CI: (0.635;0.664)	0.504; 95% CI: (0.532;0.54)	0.785; 95% CI: (0.758;0.812)	0.644; 95% CI: (0.618;0.671)	0.651; 95% CI: (0.637;0.666)	0.771; 95% CI: (0.749;0.792)	0.603; 95% CI: (0.574;0.631)	0.622; 95% CI: (0.599;0.645)	0.666; 95% CI: (0.651;0.68)	0.66; 95% CI: (0.641;0.68)	0.618; 95% CI: (0.588;0.647)	0.555; 95% CI: (0.523;0.586)	0.633; 95% CI: (0.613;0.653)	0.539; 95% CI: (0.501;0.579)
NCI_Plasma_membrane_estrogen_receptor_signaling_Pathway_(cell_adhesion)	0.608; 95% CI: (0.59;0.626)	0.575; 95% CI: (0.561;0.59)	0.538; 95% CI: (0.503;0.572)	0.825; 95% CI: (0.798;0.852)	0.635; 95% CI: (0.624;0.645)	0.601; 95% CI: (0.588;0.614)	0.648; 95% CI: (0.626;0.67)	0.589; 95% CI: (0.567;0.612)	0.523; 95% CI: (0.503;0.543)	0.627; 95% CI: (0.616;0.637)	0.599; 95% CI: (0.581;0.617)	0.52; 95% CI: (0.506;0.546)	0.532; 95% CI: (0.503;0.561)	0.635; 95% CI: (0.625;0.644)	0.508; 95% CI: (0.53;0.546)
NCI_Plasma_membrane_estrogen_receptor_signaling_Pathway_(vasodilation)	0.608; 95% CI: (0.59;0.626)	0.575; 95% CI: (0.561;0.59)	0.538; 95% CI: (0.503;0.572)	0.825; 95% CI: (0.798;0.852)	0.635; 95% CI: (0.624;0.645)	0.601; 95% CI: (0.588;0.614)	0.648; 95% CI: (0.626;0.67)	0.589; 95% CI: (0.567;0.612)	0.523; 95% CI: (0.503;0.543)	0.627; 95% CI: (0.616;0.637)	0.599; 95% CI: (0.581;0.617)	0.52; 95% CI: (0.506;0.546)	0.532; 95% CI: (0.503;0.561)	0.635; 95% CI: (0.625;0.644)	0.508; 95% CI: (0.53;0.546)
NCI_Presenilin_action_in_Notch_and_Wnt_signaling_Main_Pathway	0.536; 95% CI: (0.519;0.553)	0.629; 95% CI: (0.615;0.643)	0.507; 95% CI: (0.53;0.543)	0.664; 95% CI: (0.631;0.697)	0.668; 95% CI: (0.655;0.681)	0.608; 95% CI: (0.592;0.623)	0.79; 95% CI: (0.774;0.806)	0.531; 95% CI: (0.504;0.567)	0.623; 95% CI: (0.601;0.646)	0.625; 95% CI: (0.61;0.641)	0.599; 95% CI: (0.575;0.622)	0.604; 95% CI: (0.575;0.634)	0.56; 95% CI: (0.528;0.591)	0.667; 95% CI: (0.656;0.678)	0.593; 95% CI: (0.548;0.638)
NCI_Presenilin_action_in_Notch_and_Wnt_signaling_Pathway_(Pathway_degradation_of_CTNNB1)	0.538; 95% CI: (0.521;0.555)	0.625; 95% CI: (0.611;0.638)	0.534; 95% CI: (0.501;0.567)	0.663; 95% CI: (0.63;0.695)	0.662; 95% CI: (0.651;0.672)	0.605; 95% CI: (0.59;0.621)	0.801; 95% CI: (0.784;0.817)	0.542; 95% CI: (0.506;0.578)	0.612; 95% CI: (0.589;0.634)	0.623; 95% CI: (0.608;0.638)	0.592; 95% CI: (0.569;0.615)	0.586; 95% CI: (0.557;0.615)	0.568; 95% CI: (0.536;0.6)	0.658; 95% CI: (0.648;0.669)	0.579; 95% CI: (0.534;0.623)
NCI_Reelin_signaling_Main_Pathway	0.594; 95% CI: (0.574;0.613)	0.608; 95% CI: (0.591;0.624)	0.537; 95% CI: (0.501;0.576)	0.802; 95% CI: (0.772;0.832)	0.688; 95% CI: (0.677;0.699)	0.639; 95% CI: (0.624;0.653)	0.668; 95% CI: (0.647;0.69)	0.591; 95% CI: (0.562;0.619)	0.601; 95% CI: (0.58;0.623)	0.661; 95% CI: (0.647;0.674)	0.62; 95% CI: (0.598;0.643)	0.632; 95% CI: (0.604;0.661)	0.578; 95% CI: (0.545;0.61)	0.679; 95% CI: (0.666;0.691)	0.519; 95% CI: (0.524;0.563)
NCI_Regulation_of_CDC42_activity_Main_Pathway	0.531; 95% CI: (0.512;0.549)	0.65; 95% CI: (0.637;0.662)	0.523; 95% CI: (0.513;0.558)	0.561; 95% CI: (0.526;0.596)	0.665; 95% CI: (0.651;0.68)	0.607; 95% CI: (0.592;0.623)	0.796; 95% CI: (0.78;0.813)	0.531; 95% CI: (0.503;0.564)	0.647; 95% CI: (0.624;0.669)	0.612; 95% CI: (0.595;0.628)	0.628; 95% CI: (0.607;0.648)	0.601; 95% CI: (0.572;0.631)	0.549; 95% CI: (0.517;0.581)	0.667; 95% CI: (0.655;0.679)	0.544; 95% CI: (0.501;0.588)
NCI_Regulation_of_nuclear_beta_catenin_signaling_and_target_gene_transcription_Main_Pathway	0.517; 95% CI: (0.501;0.536)	0.672; 95% CI: (0.657;0.688)	0.506; 95% CI: (0.532;0.545)	0.653; 95% CI: (0.62;0.685)	0.726; 95% CI: (0.709;0.744)	0.635; 95% CI: (0.617;0.653)	0.784; 95% CI: (0.766;0.802)	0.509; 95% CI: (0.526;0.544)	0.696; 95% CI: (0.675;0.718)	0.654; 95% CI: (0.636;0.673)	0.646; 95% CI: (0.621;0.671)	0.676; 95% CI: (0.647;0.706)	0.602; 95% CI: (0.568;0.636)	0.722; 95% CI: (0.707;0.737)	0.567; 95% CI: (0.525;0.609)
NCI_Regulation_of_Ras_family_activation_Main_Pathway	0.523; 95% CI: (0.506;0.54)	0.641; 95% CI: (0.629;0.654)	0.535; 95% CI: (0.501;0.569)	0.598; 95% CI: (0.563;0.634)	0.602; 95% CI: (0.574;0.629)	0.627; 95% CI: (0.612;0.641)	0.785; 95% CI: (0.764;0.805)	0.578; 95% CI: (0.549;0.606)	0.671; 95% CI: (0.649;0.693)	0.612; 95% CI: (0.595;0.628)	0.637; 95% CI: (0.619;0.656)	0.655; 95% CI: (0.626;0.684)	0.537; 95% CI: (0.506;0.567)	0.608; 95% CI: (0.588;0.627)	0.508; 95% CI: (0.531;0.548)
NCI_S1P2_Main_Pathway	0.59; 95% CI: (0.572;0.608)	0.588; 95% CI: (0.574;0.603)	0.565; 95% CI: (0.529;0.602)	0.801; 95% CI: (0.773;0.829)	0.644; 95% CI: (0.634;0.655)	0.605; 95% CI: (0.592;0.619)	0.65; 95% CI: (0.628;0.672)	0.595; 95% CI: (0.573;0.618)	0.531; 95% CI: (0.511;0.552)	0.613; 95% CI: (0.6;0.627)	0.602; 95% CI: (0.584;0.621)	0.558; 95% CI: (0.529;0.587)	0.551; 95% CI: (0.521;0.581)	0.648; 95% CI: (0.64;0.657)	0.534; 95% CI: (0.507;0.576)
NCI_Signaling_events_mediated_by_Hepatocyte_Growth_Factor_Receptor_c_Met__Main_Pathway	0.623; 95% CI: (0.605;0.641)	0.669; 95% CI: (0.652;0.685)	0.537; 95% CI: (0.502;0.577)	0.789; 95% CI: (0.762;0.815)	0.735; 95% CI: (0.716;0.754)	0.632; 95% CI: (0.614;0.651)	0.748; 95% CI: (0.729;0.766)	0.54; 95% CI: (0.505;0.574)	0.625; 95% CI: (0.602;0.647)	0.691; 95% CI: (0.674;0.708)	0.633; 95% CI: (0.606;0.66)	0.626; 95% CI: (0.595;0.657)	0.556; 95% CI: (0.521;0.59)	0.731; 95% CI: (0.713;0.749)	0.531; 95% CI: (0.516;0.579)
NCI_Signaling_events_mediated_by_Hepatocyte_Growth_Factor_Receptor_c_Met__Pathway_(positive_regulation_of_tyrosine_phosphorylation_of_STAT_protein)	0.612; 95% CI: (0.593;0.63)	0.602; 95% CI: (0.587;0.617)	0.529; 95% CI: (0.508;0.566)	0.847; 95% CI: (0.821;0.874)	0.66; 95% CI: (0.649;0.671)	0.615; 95% CI: (0.601;0.629)	0.638; 95% CI: (0.616;0.66)	0.51; 95% CI: (0.521;0.542)	0.562; 95% CI: (0.54;0.583)	0.644; 95% CI: (0.632;0.656)	0.608; 95% CI: (0.588;0.628)	0.553; 95% CI: (0.526;0.579)	0.533; 95% CI: (0.503;0.563)	0.662; 95% CI: (0.653;0.672)	0.501; 95% CI: (0.538;0.54)
NCI_Signaling_events_mediated_by_Stem_cell_factor_receptor_c_Kit__Main_Pathway	0.609; 95% CI: (0.59;0.627)	0.571; 95% CI: (0.552;0.59)	0.504; 95% CI: (0.532;0.541)	0.844; 95% CI: (0.819;0.869)	0.677; 95% CI: (0.657;0.697)	0.64; 95% CI: (0.623;0.656)	0.691; 95% CI: (0.668;0.713)	0.594; 95% CI: (0.563;0.626)	0.596; 95% CI: (0.574;0.619)	0.68; 95% CI: (0.665;0.694)	0.64; 95% CI: (0.616;0.663)	0.593; 95% CI: (0.563;0.624)	0.524; 95% CI: (0.509;0.557)	0.691; 95% CI: (0.674;0.708)	0.504; 95% CI: (0.54;0.548)
NCI_Signaling_events_mediated_by_the_Hedgehog_family_Main_Pathway	0.601; 95% CI: (0.582;0.62)	0.605; 95% CI: (0.589;0.621)	0.531; 95% CI: (0.506;0.568)	0.823; 95% CI: (0.795;0.851)	0.672; 95% CI: (0.66;0.684)	0.612; 95% CI: (0.596;0.627)	0.658; 95% CI: (0.636;0.681)	0.583; 95% CI: (0.554;0.612)	0.567; 95% CI: (0.546;0.589)	0.643; 95% CI: (0.629;0.657)	0.609; 95% CI: (0.586;0.632)	0.561; 95% CI: (0.533;0.588)	0.563; 95% CI: (0.531;0.596)	0.666; 95% CI: (0.654;0.679)	0.553; 95% CI: (0.512;0.594)
NCI_Signaling_events_mediated_by_VEGFR1_and_VEGFR2_Main_Pathway	0.581; 95% CI: (0.562;0.6)	0.658; 95% CI: (0.64;0.676)	0.514; 95% CI: (0.526;0.554)	0.777; 95% CI: (0.749;0.805)	0.728; 95% CI: (0.706;0.749)	0.656; 95% CI: (0.637;0.675)	0.693; 95% CI: (0.671;0.716)	0.552; 95% CI: (0.518;0.587)	0.62; 95% CI: (0.597;0.643)	0.707; 95% CI: (0.69;0.723)	0.655; 95% CI: (0.628;0.682)	0.701; 95% CI: (0.674;0.729)	0.546; 95% CI: (0.51;0.583)	0.566; 95% CI: (0.547;0.586)	0.571; 95% CI: (0.524;0.618)
NCI_Signaling_events_mediated_by_VEGFR1_and_VEGFR2_Pathway_(angiogenesis)	0.608; 95% CI: (0.589;0.627)	0.602; 95% CI: (0.586;0.619)	0.522; 95% CI: (0.516;0.56)	0.831; 95% CI: (0.805;0.857)	0.669; 95% CI: (0.651;0.687)	0.632; 95% CI: (0.616;0.647)	0.66; 95% CI: (0.638;0.682)	0.504; 95% CI: (0.529;0.538)	0.574; 95% CI: (0.552;0.596)	0.663; 95% CI: (0.649;0.677)	0.619; 95% CI: (0.595;0.643)	0.59; 95% CI: (0.56;0.62)	0.545; 95% CI: (0.512;0.577)	0.686; 95% CI: (0.673;0.699)	0.552; 95% CI: (0.509;0.595)
NCI_Signaling_events_mediated_by_VEGFR1_and_VEGFR2_Pathway_(regulation_of_vascular_permeability)	0.607; 95% CI: (0.588;0.626)	0.604; 95% CI: (0.587;0.62)	0.522; 95% CI: (0.516;0.56)	0.83; 95% CI: (0.803;0.856)	0.672; 95% CI: (0.654;0.689)	0.633; 95% CI: (0.617;0.648)	0.66; 95% CI: (0.637;0.682)	0.504; 95% CI: (0.529;0.538)	0.577; 95% CI: (0.555;0.599)	0.663; 95% CI: (0.649;0.677)	0.615; 95% CI: (0.591;0.64)	0.594; 95% CI: (0.564;0.624)	0.545; 95% CI: (0.512;0.577)	0.689; 95% CI: (0.676;0.702)	0.555; 95% CI: (0.511;0.599)
NCI_Signaling_events_regulated_by_Ret_tyrosine_kinase_Main_Pathway	0.602; 95% CI: (0.584;0.62)	0.607; 95% CI: (0.592;0.622)	0.536; 95% CI: (0.5;0.573)	0.795; 95% CI: (0.767;0.823)	0.648; 95% CI: (0.63;0.665)	0.62; 95% CI: (0.605;0.635)	0.673; 95% CI: (0.651;0.695)	0.566; 95% CI: (0.536;0.595)	0.58; 95% CI: (0.558;0.602)	0.638; 95% CI: (0.624;0.653)	0.621; 95% CI: (0.601;0.642)	0.559; 95% CI: (0.53;0.589)	0.556; 95% CI: (0.523;0.588)	0.67; 95% CI: (0.659;0.681)	0.508; 95% CI: (0.532;0.548)
NCI_Signaling_events_regulated_by_Ret_tyrosine_kinase_Pathway_(lamellipodium_assembly)	0.605; 95% CI: (0.587;0.623)	0.575; 95% CI: (0.56;0.589)	0.548; 95% CI: (0.513;0.583)	0.817; 95% CI: (0.789;0.845)	0.623; 95% CI: (0.611;0.635)	0.607; 95% CI: (0.595;0.618)	0.627; 95% CI: (0.605;0.649)	0.573; 95% CI: (0.55;0.596)	0.529; 95% CI: (0.509;0.549)	0.613; 95% CI: (0.601;0.624)	0.596; 95% CI: (0.578;0.613)	0.518; 95% CI: (0.508;0.544)	0.537; 95% CI: (0.508;0.565)	0.628; 95% CI: (0.619;0.638)	0.504; 95% CI: (0.532;0.54)
NCI_TCR_signaling_in_naive_CD4_T_cells_Main_Pathway	0.503; 95% CI: (0.515;0.521)	0.615; 95% CI: (0.598;0.632)	0.547; 95% CI: (0.512;0.582)	0.734; 95% CI: (0.703;0.765)	0.639; 95% CI: (0.61;0.667)	0.638; 95% CI: (0.622;0.654)	0.778; 95% CI: (0.757;0.799)	0.588; 95% CI: (0.557;0.618)	0.667; 95% CI: (0.645;0.69)	0.661; 95% CI: (0.645;0.677)	0.654; 95% CI: (0.632;0.675)	0.669; 95% CI: (0.64;0.698)	0.514; 95% CI: (0.518;0.547)	0.648; 95% CI: (0.628;0.668)	0.515; 95% CI: (0.525;0.555)
NCI_TCR_signaling_in_naive_CD8_T_cells_Main_Pathway	0.502; 95% CI: (0.516;0.519)	0.639; 95% CI: (0.625;0.653)	0.536; 95% CI: (0.501;0.572)	0.592; 95% CI: (0.557;0.628)	0.631; 95% CI: (0.605;0.657)	0.625; 95% CI: (0.61;0.641)	0.781; 95% CI: (0.76;0.802)	0.573; 95% CI: (0.543;0.603)	0.665; 95% CI: (0.642;0.687)	0.644; 95% CI: (0.628;0.659)	0.622; 95% CI: (0.6;0.644)	0.671; 95% CI: (0.643;0.699)	0.547; 95% CI: (0.515;0.578)	0.627; 95% CI: (0.608;0.647)	0.508; 95% CI: (0.531;0.548)
NCI_TRAIL_signaling_Main_Pathway	0.611; 95% CI: (0.593;0.629)	0.578; 95% CI: (0.563;0.592)	0.582; 95% CI: (0.545;0.62)	0.814; 95% CI: (0.786;0.842)	0.631; 95% CI: (0.619;0.643)	0.609; 95% CI: (0.597;0.621)	0.625; 95% CI: (0.603;0.646)	0.584; 95% CI: (0.562;0.607)	0.518; 95% CI: (0.502;0.538)	0.615; 95% CI: (0.603;0.628)	0.593; 95% CI: (0.575;0.612)	0.541; 95% CI: (0.513;0.568)	0.52; 95% CI: (0.508;0.548)	0.641; 95% CI: (0.633;0.649)	0.541; 95% CI: (0.501;0.583)
NCI_Trk_receptor_signaling_mediated_by_PI3K_and_PLC_gamma_Main_Pathway	0.557; 95% CI: (0.539;0.574)	0.623; 95% CI: (0.608;0.638)	0.512; 95% CI: (0.524;0.548)	0.79; 95% CI: (0.763;0.817)	0.627; 95% CI: (0.6;0.654)	0.642; 95% CI: (0.628;0.657)	0.753; 95% CI: (0.731;0.775)	0.597; 95% CI: (0.569;0.625)	0.599; 95% CI: (0.575;0.622)	0.659; 95% CI: (0.646;0.673)	0.642; 95% CI: (0.623;0.662)	0.598; 95% CI: (0.569;0.628)	0.528; 95% CI: (0.503;0.559)	0.624; 95% CI: (0.604;0.644)	0.507; 95% CI: (0.532;0.547)
NCI_Trk_receptor_signaling_mediated_by_PI3K_and_PLC_gamma_Pathway_(axonogenesis)	0.566; 95% CI: (0.548;0.583)	0.602; 95% CI: (0.588;0.615)	0.521; 95% CI: (0.513;0.554)	0.806; 95% CI: (0.779;0.833)	0.589; 95% CI: (0.563;0.615)	0.633; 95% CI: (0.622;0.645)	0.723; 95% CI: (0.7;0.746)	0.601; 95% CI: (0.579;0.622)	0.564; 95% CI: (0.541;0.586)	0.639; 95% CI: (0.628;0.651)	0.619; 95% CI: (0.602;0.635)	0.544; 95% CI: (0.517;0.571)	0.505; 95% CI: (0.522;0.533)	0.583; 95% CI: (0.564;0.602)	0.556; 95% CI: (0.523;0.588)
NCI_Trk_receptor_signaling_mediated_by_PI3K_and_PLC_gamma_Pathway_(neuron_apoptosis)	0.566; 95% CI: (0.548;0.583)	0.602; 95% CI: (0.588;0.615)	0.521; 95% CI: (0.513;0.554)	0.806; 95% CI: (0.779;0.833)	0.589; 95% CI: (0.563;0.615)	0.633; 95% CI: (0.622;0.645)	0.723; 95% CI: (0.7;0.746)	0.601; 95% CI: (0.579;0.622)	0.564; 95% CI: (0.541;0.586)	0.639; 95% CI: (0.628;0.651)	0.619; 95% CI: (0.602;0.635)	0.544; 95% CI: (0.517;0.571)	0.505; 95% CI: (0.522;0.533)	0.583; 95% CI: (0.564;0.602)	0.556; 95% CI: (0.523;0.588)
NCI_Trk_receptor_signaling_mediated_by_the_MAPK_Main_Pathway	0.581; 95% CI: (0.566;0.595)	0.65; 95% CI: (0.639;0.661)	0.524; 95% CI: (0.509;0.558)	0.573; 95% CI: (0.538;0.609)	0.596; 95% CI: (0.57;0.623)	0.627; 95% CI: (0.614;0.641)	0.754; 95% CI: (0.732;0.776)	0.6; 95% CI: (0.574;0.625)	0.624; 95% CI: (0.601;0.647)	0.641; 95% CI: (0.628;0.654)	0.633; 95% CI: (0.616;0.65)	0.733; 95% CI: (0.71;0.756)	0.503; 95% CI: (0.527;0.532)	0.633; 95% CI: (0.612;0.653)	0.509; 95% CI: (0.532;0.549)
NCI_Validated_targets_of_C_MYC_transcriptional_activation_Main_Pathway	0.531; 95% CI: (0.51;0.551)	0.53; 95% CI: (0.507;0.553)	0.616; 95% CI: (0.585;0.647)	0.557; 95% CI: (0.523;0.592)	0.622; 95% CI: (0.591;0.652)	0.709; 95% CI: (0.695;0.723)	0.74; 95% CI: (0.719;0.761)	0.542; 95% CI: (0.504;0.58)	0.699; 95% CI: (0.677;0.721)	0.581; 95% CI: (0.561;0.601)	0.685; 95% CI: (0.661;0.709)	0.508; 95% CI: (0.519;0.534)	0.573; 95% CI: (0.541;0.605)	0.763; 95% CI: (0.752;0.774)	0.509; 95% CI: (0.53;0.548)
NCI_VEGFR3_signaling_in_lymphatic_endothelium_Main_Pathway	0.622; 95% CI: (0.604;0.64)	0.576; 95% CI: (0.562;0.591)	0.559; 95% CI: (0.523;0.595)	0.817; 95% CI: (0.789;0.845)	0.626; 95% CI: (0.614;0.639)	0.602; 95% CI: (0.589;0.615)	0.619; 95% CI: (0.597;0.64)	0.579; 95% CI: (0.556;0.602)	0.52; 95% CI: (0.5;0.54)	0.616; 95% CI: (0.604;0.628)	0.593; 95% CI: (0.575;0.612)	0.515; 95% CI: (0.512;0.541)	0.53; 95% CI: (0.501;0.558)	0.629; 95% CI: (0.619;0.64)	0.504; 95% CI: (0.534;0.541)
Neuronal_Development_Induced_by_CDK5	0.587; 95% CI: (0.568;0.606)	0.645; 95% CI: (0.628;0.661)	0.526; 95% CI: (0.513;0.565)	0.79; 95% CI: (0.763;0.816)	0.725; 95% CI: (0.709;0.74)	0.645; 95% CI: (0.627;0.662)	0.717; 95% CI: (0.696;0.739)	0.502; 95% CI: (0.533;0.536)	0.646; 95% CI: (0.624;0.668)	0.672; 95% CI: (0.655;0.689)	0.641; 95% CI: (0.616;0.666)	0.643; 95% CI: (0.613;0.672)	0.565; 95% CI: (0.531;0.598)	0.727; 95% CI: (0.714;0.739)	0.538; 95% CI: (0.506;0.582)
NGF_Pathway	0.549; 95% CI: (0.53;0.569)	0.571; 95% CI: (0.547;0.594)	0.6; 95% CI: (0.566;0.634)	0.697; 95% CI: (0.67;0.723)	0.752; 95% CI: (0.722;0.782)	0.77; 95% CI: (0.755;0.785)	0.791; 95% CI: (0.771;0.812)	0.593; 95% CI: (0.553;0.633)	0.714; 95% CI: (0.693;0.734)	0.502; 95% CI: (0.519;0.522)	0.749; 95% CI: (0.723;0.775)	0.568; 95% CI: (0.542;0.594)	0.574; 95% CI: (0.541;0.607)	0.677; 95% CI: (0.66;0.693)	0.507; 95% CI: (0.534;0.547)
NGF_Pathway_Neurite_Outgrowth_and_Differentiation	0.61; 95% CI: (0.591;0.628)	0.57; 95% CI: (0.553;0.588)	0.533; 95% CI: (0.506;0.571)	0.822; 95% CI: (0.793;0.85)	0.665; 95% CI: (0.65;0.681)	0.623; 95% CI: (0.607;0.638)	0.656; 95% CI: (0.634;0.678)	0.589; 95% CI: (0.561;0.617)	0.58; 95% CI: (0.559;0.602)	0.652; 95% CI: (0.639;0.666)	0.632; 95% CI: (0.613;0.652)	0.564; 95% CI: (0.535;0.594)	0.537; 95% CI: (0.505;0.568)	0.68; 95% CI: (0.669;0.691)	0.521; 95% CI: (0.52;0.563)
NGF_Pathway_Neuronal_Survival	0.62; 95% CI: (0.601;0.639)	0.56; 95% CI: (0.543;0.578)	0.539; 95% CI: (0.501;0.578)	0.831; 95% CI: (0.802;0.86)	0.674; 95% CI: (0.666;0.681)	0.63; 95% CI: (0.617;0.644)	0.652; 95% CI: (0.63;0.674)	0.585; 95% CI: (0.558;0.611)	0.557; 95% CI: (0.536;0.578)	0.644; 95% CI: (0.632;0.657)	0.622; 95% CI: (0.603;0.641)	0.54; 95% CI: (0.512;0.567)	0.537; 95% CI: (0.507;0.568)	0.664; 95% CI: (0.654;0.675)	0.506; 95% CI: (0.533;0.546)
p38_Signaling_Pathway	0.529; 95% CI: (0.511;0.548)	0.59; 95% CI: (0.569;0.61)	0.567; 95% CI: (0.531;0.603)	0.618; 95% CI: (0.585;0.652)	0.78; 95% CI: (0.755;0.805)	0.724; 95% CI: (0.708;0.74)	0.803; 95% CI: (0.784;0.823)	0.517; 95% CI: (0.515;0.549)	0.766; 95% CI: (0.748;0.784)	0.585; 95% CI: (0.566;0.603)	0.731; 95% CI: (0.705;0.756)	0.688; 95% CI: (0.658;0.717)	0.627; 95% CI: (0.595;0.659)	0.844; 95% CI: (0.83;0.859)	0.597; 95% CI: (0.56;0.634)
p53_Signaling_Pathway	0.537; 95% CI: (0.517;0.557)	0.518; 95% CI: (0.504;0.54)	0.604; 95% CI: (0.569;0.639)	0.673; 95% CI: (0.648;0.699)	0.792; 95% CI: (0.768;0.817)	0.72; 95% CI: (0.704;0.737)	0.739; 95% CI: (0.717;0.76)	0.561; 95% CI: (0.522;0.6)	0.712; 95% CI: (0.691;0.733)	0.512; 95% CI: (0.508;0.532)	0.7; 95% CI: (0.673;0.727)	0.574; 95% CI: (0.544;0.604)	0.588; 95% CI: (0.554;0.621)	0.835; 95% CI: (0.824;0.847)	0.531; 95% CI: (0.512;0.574)
p53_Signaling_Pathway_Apoptosis	0.53; 95% CI: (0.51;0.55)	0.51; 95% CI: (0.513;0.533)	0.609; 95% CI: (0.578;0.641)	0.551; 95% CI: (0.517;0.585)	0.724; 95% CI: (0.701;0.748)	0.711; 95% CI: (0.696;0.726)	0.729; 95% CI: (0.708;0.75)	0.561; 95% CI: (0.523;0.599)	0.699; 95% CI: (0.677;0.721)	0.573; 95% CI: (0.553;0.594)	0.674; 95% CI: (0.649;0.699)	0.519; 95% CI: (0.511;0.548)	0.574; 95% CI: (0.542;0.607)	0.774; 95% CI: (0.764;0.784)	0.528; 95% CI: (0.512;0.568)
p53_Signaling_Pathway_Breast_Cancer	0.524; 95% CI: (0.504;0.545)	0.53; 95% CI: (0.507;0.552)	0.605; 95% CI: (0.574;0.635)	0.554; 95% CI: (0.521;0.587)	0.706; 95% CI: (0.683;0.729)	0.707; 95% CI: (0.693;0.72)	0.725; 95% CI: (0.703;0.746)	0.546; 95% CI: (0.507;0.584)	0.678; 95% CI: (0.655;0.701)	0.595; 95% CI: (0.575;0.615)	0.666; 95% CI: (0.642;0.691)	0.537; 95% CI: (0.51;0.563)	0.562; 95% CI: (0.53;0.594)	0.756; 95% CI: (0.746;0.766)	0.518; 95% CI: (0.521;0.558)
p53_Signaling_Pathway_Cancer	0.529; 95% CI: (0.509;0.549)	0.515; 95% CI: (0.508;0.537)	0.61; 95% CI: (0.579;0.641)	0.55; 95% CI: (0.517;0.584)	0.719; 95% CI: (0.695;0.742)	0.71; 95% CI: (0.695;0.724)	0.721; 95% CI: (0.7;0.743)	0.556; 95% CI: (0.518;0.594)	0.695; 95% CI: (0.673;0.717)	0.582; 95% CI: (0.562;0.603)	0.668; 95% CI: (0.643;0.693)	0.507; 95% CI: (0.523;0.536)	0.569; 95% CI: (0.537;0.602)	0.769; 95% CI: (0.76;0.779)	0.527; 95% CI: (0.513;0.567)
p53_Signaling_Pathway_Cell_Cycle_Arrest	0.524; 95% CI: (0.504;0.545)	0.524; 95% CI: (0.501;0.547)	0.601; 95% CI: (0.57;0.632)	0.558; 95% CI: (0.525;0.592)	0.711; 95% CI: (0.688;0.734)	0.706; 95% CI: (0.692;0.72)	0.723; 95% CI: (0.701;0.744)	0.543; 95% CI: (0.505;0.582)	0.683; 95% CI: (0.661;0.706)	0.586; 95% CI: (0.566;0.606)	0.667; 95% CI: (0.643;0.692)	0.52; 95% CI: (0.507;0.547)	0.565; 95% CI: (0.532;0.597)	0.763; 95% CI: (0.753;0.773)	0.523; 95% CI: (0.517;0.563)
p53_Signaling_Pathway_Cell_Growth_Accumulation	0.522; 95% CI: (0.502;0.543)	0.53; 95% CI: (0.507;0.553)	0.604; 95% CI: (0.574;0.634)	0.551; 95% CI: (0.517;0.584)	0.704; 95% CI: (0.681;0.727)	0.705; 95% CI: (0.691;0.719)	0.721; 95% CI: (0.699;0.742)	0.546; 95% CI: (0.508;0.584)	0.68; 95% CI: (0.657;0.702)	0.597; 95% CI: (0.576;0.617)	0.666; 95% CI: (0.642;0.69)	0.534; 95% CI: (0.508;0.561)	0.561; 95% CI: (0.529;0.593)	0.755; 95% CI: (0.745;0.764)	0.521; 95% CI: (0.519;0.56)
p53_Signaling_Pathway_DNA_Repair	0.524; 95% CI: (0.503;0.544)	0.529; 95% CI: (0.507;0.552)	0.605; 95% CI: (0.575;0.636)	0.55; 95% CI: (0.517;0.584)	0.705; 95% CI: (0.682;0.728)	0.704; 95% CI: (0.69;0.718)	0.72; 95% CI: (0.698;0.742)	0.548; 95% CI: (0.51;0.586)	0.683; 95% CI: (0.661;0.705)	0.596; 95% CI: (0.575;0.616)	0.664; 95% CI: (0.64;0.689)	0.537; 95% CI: (0.51;0.563)	0.559; 95% CI: (0.527;0.591)	0.756; 95% CI: (0.747;0.766)	0.522; 95% CI: (0.518;0.561)
p53_Signaling_Pathway_Exosome_Mediated_Secretion	0.522; 95% CI: (0.502;0.543)	0.529; 95% CI: (0.506;0.551)	0.605; 95% CI: (0.575;0.635)	0.551; 95% CI: (0.518;0.585)	0.705; 95% CI: (0.682;0.728)	0.706; 95% CI: (0.692;0.72)	0.72; 95% CI: (0.698;0.741)	0.544; 95% CI: (0.506;0.582)	0.68; 95% CI: (0.657;0.702)	0.595; 95% CI: (0.575;0.616)	0.667; 95% CI: (0.643;0.691)	0.525; 95% CI: (0.501;0.552)	0.561; 95% CI: (0.529;0.593)	0.755; 95% CI: (0.746;0.765)	0.519; 95% CI: (0.52;0.559)
p53_Signaling_Pathway_Gene_Expression_Anti-Apoptosis_via_TP53	0.529; 95% CI: (0.509;0.549)	0.515; 95% CI: (0.508;0.537)	0.61; 95% CI: (0.579;0.641)	0.55; 95% CI: (0.517;0.584)	0.719; 95% CI: (0.695;0.742)	0.71; 95% CI: (0.695;0.724)	0.721; 95% CI: (0.7;0.743)	0.556; 95% CI: (0.518;0.594)	0.695; 95% CI: (0.673;0.717)	0.582; 95% CI: (0.562;0.603)	0.668; 95% CI: (0.643;0.693)	0.507; 95% CI: (0.523;0.536)	0.569; 95% CI: (0.537;0.602)	0.769; 95% CI: (0.76;0.779)	0.527; 95% CI: (0.513;0.567)
p53_Signaling_Pathway_Gene_Expression_Cell_Cycle_and_Cell_Growth_via_TP53	0.529; 95% CI: (0.509;0.549)	0.515; 95% CI: (0.508;0.537)	0.61; 95% CI: (0.579;0.641)	0.55; 95% CI: (0.517;0.584)	0.719; 95% CI: (0.695;0.742)	0.71; 95% CI: (0.695;0.724)	0.721; 95% CI: (0.7;0.743)	0.556; 95% CI: (0.518;0.594)	0.695; 95% CI: (0.673;0.717)	0.582; 95% CI: (0.562;0.603)	0.668; 95% CI: (0.643;0.693)	0.507; 95% CI: (0.523;0.536)	0.569; 95% CI: (0.537;0.602)	0.769; 95% CI: (0.76;0.779)	0.527; 95% CI: (0.513;0.567)
p53_Signaling_Pathway_Gene_Expression_Cell_Fate_and_Development_via_TP53	0.529; 95% CI: (0.509;0.549)	0.515; 95% CI: (0.508;0.537)	0.61; 95% CI: (0.579;0.641)	0.55; 95% CI: (0.517;0.584)	0.719; 95% CI: (0.695;0.742)	0.71; 95% CI: (0.695;0.724)	0.721; 95% CI: (0.7;0.743)	0.556; 95% CI: (0.518;0.594)	0.695; 95% CI: (0.673;0.717)	0.582; 95% CI: (0.562;0.603)	0.668; 95% CI: (0.643;0.693)	0.507; 95% CI: (0.523;0.536)	0.569; 95% CI: (0.537;0.602)	0.769; 95% CI: (0.76;0.779)	0.527; 95% CI: (0.513;0.567)
p53_Signaling_Pathway_Gene_Expression_Cell_Signaling_via_TP53	0.529; 95% CI: (0.509;0.549)	0.515; 95% CI: (0.508;0.537)	0.61; 95% CI: (0.579;0.641)	0.55; 95% CI: (0.517;0.584)	0.719; 95% CI: (0.695;0.742)	0.71; 95% CI: (0.695;0.724)	0.721; 95% CI: (0.7;0.743)	0.556; 95% CI: (0.518;0.594)	0.695; 95% CI: (0.673;0.717)	0.582; 95% CI: (0.562;0.603)	0.668; 95% CI: (0.643;0.693)	0.507; 95% CI: (0.523;0.536)	0.569; 95% CI: (0.537;0.602)	0.769; 95% CI: (0.76;0.779)	0.527; 95% CI: (0.513;0.567)
p53_Signaling_Pathway_Gene_Expression_DNA_Replication_and_Repair_via_TP53	0.529; 95% CI: (0.509;0.549)	0.515; 95% CI: (0.508;0.537)	0.61; 95% CI: (0.579;0.641)	0.55; 95% CI: (0.517;0.584)	0.719; 95% CI: (0.695;0.742)	0.71; 95% CI: (0.695;0.724)	0.721; 95% CI: (0.7;0.743)	0.556; 95% CI: (0.518;0.594)	0.695; 95% CI: (0.673;0.717)	0.582; 95% CI: (0.562;0.603)	0.668; 95% CI: (0.643;0.693)	0.507; 95% CI: (0.523;0.536)	0.569; 95% CI: (0.537;0.602)	0.769; 95% CI: (0.76;0.779)	0.527; 95% CI: (0.513;0.567)
p53_Signaling_Pathway_Gene_Expression_ECM_and_Adhesion_via_TP53	0.529; 95% CI: (0.509;0.549)	0.515; 95% CI: (0.508;0.537)	0.61; 95% CI: (0.579;0.641)	0.55; 95% CI: (0.517;0.584)	0.719; 95% CI: (0.695;0.742)	0.71; 95% CI: (0.695;0.724)	0.721; 95% CI: (0.7;0.743)	0.556; 95% CI: (0.518;0.594)	0.695; 95% CI: (0.673;0.717)	0.582; 95% CI: (0.562;0.603)	0.668; 95% CI: (0.643;0.693)	0.507; 95% CI: (0.523;0.536)	0.569; 95% CI: (0.537;0.602)	0.769; 95% CI: (0.76;0.779)	0.527; 95% CI: (0.513;0.567)
p53_Signaling_Pathway_Gene_Expression_Infection_and_Immune_Response_via_TP53	0.529; 95% CI: (0.509;0.549)	0.515; 95% CI: (0.508;0.537)	0.61; 95% CI: (0.579;0.641)	0.55; 95% CI: (0.517;0.584)	0.719; 95% CI: (0.695;0.742)	0.71; 95% CI: (0.695;0.724)	0.721; 95% CI: (0.7;0.743)	0.556; 95% CI: (0.518;0.594)	0.695; 95% CI: (0.673;0.717)	0.582; 95% CI: (0.562;0.603)	0.668; 95% CI: (0.643;0.693)	0.507; 95% CI: (0.523;0.536)	0.569; 95% CI: (0.537;0.602)	0.769; 95% CI: (0.76;0.779)	0.527; 95% CI: (0.513;0.567)
p53_Signaling_Pathway_Inhibition_of_Angiogenesis_and_Metastasis	0.524; 95% CI: (0.504;0.545)	0.529; 95% CI: (0.506;0.552)	0.609; 95% CI: (0.578;0.639)	0.55; 95% CI: (0.516;0.584)	0.708; 95% CI: (0.685;0.731)	0.703; 95% CI: (0.689;0.717)	0.72; 95% CI: (0.699;0.742)	0.544; 95% CI: (0.506;0.582)	0.685; 95% CI: (0.663;0.707)	0.595; 95% CI: (0.574;0.615)	0.663; 95% CI: (0.639;0.688)	0.532; 95% CI: (0.505;0.559)	0.559; 95% CI: (0.527;0.591)	0.761; 95% CI: (0.751;0.77)	0.516; 95% CI: (0.523;0.556)
p53_Signaling_Pathway_Normal_Cell_Cycle_Progression	0.529; 95% CI: (0.509;0.549)	0.515; 95% CI: (0.508;0.537)	0.61; 95% CI: (0.579;0.641)	0.55; 95% CI: (0.517;0.584)	0.719; 95% CI: (0.695;0.742)	0.71; 95% CI: (0.695;0.724)	0.721; 95% CI: (0.7;0.743)	0.556; 95% CI: (0.518;0.594)	0.695; 95% CI: (0.673;0.717)	0.582; 95% CI: (0.562;0.603)	0.668; 95% CI: (0.643;0.693)	0.507; 95% CI: (0.523;0.536)	0.569; 95% CI: (0.537;0.602)	0.769; 95% CI: (0.76;0.779)	0.527; 95% CI: (0.513;0.567)
PAK_Pathway	0.559; 95% CI: (0.542;0.576)	0.676; 95% CI: (0.659;0.693)	0.511; 95% CI: (0.527;0.549)	0.696; 95% CI: (0.666;0.726)	0.784; 95% CI: (0.756;0.811)	0.656; 95% CI: (0.638;0.674)	0.789; 95% CI: (0.768;0.809)	0.533; 95% CI: (0.5;0.566)	0.751; 95% CI: (0.733;0.77)	0.709; 95% CI: (0.69;0.727)	0.72; 95% CI: (0.694;0.746)	0.722; 95% CI: (0.693;0.75)	0.623; 95% CI: (0.592;0.655)	0.789; 95% CI: (0.77;0.809)	0.606; 95% CI: (0.564;0.648)
PAK_Pathway_Actin_Organization	0.546; 95% CI: (0.528;0.563)	0.679; 95% CI: (0.662;0.696)	0.518; 95% CI: (0.519;0.555)	0.701; 95% CI: (0.671;0.73)	0.741; 95% CI: (0.714;0.768)	0.665; 95% CI: (0.646;0.683)	0.795; 95% CI: (0.775;0.814)	0.539; 95% CI: (0.505;0.573)	0.728; 95% CI: (0.707;0.748)	0.696; 95% CI: (0.677;0.714)	0.704; 95% CI: (0.679;0.728)	0.703; 95% CI: (0.674;0.732)	0.608; 95% CI: (0.576;0.641)	0.736; 95% CI: (0.717;0.755)	0.574; 95% CI: (0.532;0.615)
PAK_Pathway_Cell_Survival	0.546; 95% CI: (0.528;0.563)	0.679; 95% CI: (0.662;0.696)	0.518; 95% CI: (0.519;0.555)	0.701; 95% CI: (0.671;0.73)	0.741; 95% CI: (0.714;0.768)	0.665; 95% CI: (0.646;0.683)	0.795; 95% CI: (0.775;0.814)	0.539; 95% CI: (0.505;0.573)	0.728; 95% CI: (0.707;0.748)	0.696; 95% CI: (0.677;0.714)	0.704; 95% CI: (0.679;0.728)	0.703; 95% CI: (0.674;0.732)	0.608; 95% CI: (0.576;0.641)	0.736; 95% CI: (0.717;0.755)	0.574; 95% CI: (0.532;0.615)
PAK_Pathway_Lamelliopodia_and_Filopodia_Outgrowth	0.546; 95% CI: (0.529;0.564)	0.679; 95% CI: (0.661;0.696)	0.518; 95% CI: (0.519;0.555)	0.699; 95% CI: (0.669;0.729)	0.742; 95% CI: (0.715;0.77)	0.663; 95% CI: (0.645;0.681)	0.793; 95% CI: (0.773;0.813)	0.54; 95% CI: (0.505;0.574)	0.73; 95% CI: (0.71;0.75)	0.698; 95% CI: (0.68;0.717)	0.704; 95% CI: (0.679;0.729)	0.704; 95% CI: (0.675;0.733)	0.61; 95% CI: (0.577;0.642)	0.739; 95% CI: (0.72;0.758)	0.581; 95% CI: (0.539;0.622)
PLAU-mediated_Signaling_Events_During_Cell_Adhesion	0.596; 95% CI: (0.578;0.615)	0.551; 95% CI: (0.533;0.57)	0.529; 95% CI: (0.508;0.567)	0.802; 95% CI: (0.774;0.83)	0.691; 95% CI: (0.681;0.701)	0.64; 95% CI: (0.625;0.654)	0.652; 95% CI: (0.63;0.675)	0.587; 95% CI: (0.558;0.615)	0.61; 95% CI: (0.588;0.632)	0.654; 95% CI: (0.639;0.668)	0.619; 95% CI: (0.596;0.642)	0.562; 95% CI: (0.532;0.592)	0.53; 95% CI: (0.502;0.561)	0.664; 95% CI: (0.648;0.68)	0.505; 95% CI: (0.538;0.548)
PPAR_Pathway	0.544; 95% CI: (0.527;0.562)	0.674; 95% CI: (0.657;0.692)	0.516; 95% CI: (0.52;0.553)	0.717; 95% CI: (0.689;0.745)	0.772; 95% CI: (0.745;0.8)	0.658; 95% CI: (0.64;0.677)	0.796; 95% CI: (0.776;0.816)	0.531; 95% CI: (0.503;0.564)	0.745; 95% CI: (0.726;0.764)	0.705; 95% CI: (0.687;0.724)	0.712; 95% CI: (0.686;0.738)	0.708; 95% CI: (0.679;0.737)	0.602; 95% CI: (0.569;0.635)	0.768; 95% CI: (0.748;0.788)	0.607; 95% CI: (0.567;0.646)
PRL_Pathway	0.604; 95% CI: (0.585;0.622)	0.636; 95% CI: (0.619;0.653)	0.552; 95% CI: (0.512;0.591)	0.776; 95% CI: (0.748;0.805)	0.689; 95% CI: (0.669;0.71)	0.638; 95% CI: (0.622;0.655)	0.697; 95% CI: (0.675;0.718)	0.569; 95% CI: (0.535;0.603)	0.624; 95% CI: (0.601;0.647)	0.67; 95% CI: (0.654;0.686)	0.638; 95% CI: (0.613;0.663)	0.62; 95% CI: (0.588;0.651)	0.563; 95% CI: (0.529;0.597)	0.696; 95% CI: (0.679;0.713)	0.552; 95% CI: (0.508;0.597)
PTEN_Pathway	0.551; 95% CI: (0.533;0.568)	0.614; 95% CI: (0.594;0.634)	0.556; 95% CI: (0.521;0.592)	0.67; 95% CI: (0.641;0.698)	0.841; 95% CI: (0.816;0.866)	0.732; 95% CI: (0.716;0.748)	0.806; 95% CI: (0.786;0.827)	0.522; 95% CI: (0.51;0.554)	0.772; 95% CI: (0.754;0.79)	0.607; 95% CI: (0.589;0.626)	0.738; 95% CI: (0.712;0.764)	0.702; 95% CI: (0.673;0.731)	0.631; 95% CI: (0.6;0.663)	0.836; 95% CI: (0.822;0.85)	0.592; 95% CI: (0.556;0.628)
PTEN_Pathway_Adhesion_or_Migration	0.545; 95% CI: (0.527;0.563)	0.667; 95% CI: (0.649;0.684)	0.514; 95% CI: (0.523;0.551)	0.661; 95% CI: (0.628;0.693)	0.808; 95% CI: (0.788;0.828)	0.637; 95% CI: (0.619;0.655)	0.775; 95% CI: (0.755;0.796)	0.521; 95% CI: (0.51;0.552)	0.763; 95% CI: (0.745;0.781)	0.699; 95% CI: (0.681;0.718)	0.696; 95% CI: (0.67;0.723)	0.751; 95% CI: (0.723;0.779)	0.631; 95% CI: (0.6;0.662)	0.861; 95% CI: (0.847;0.875)	0.633; 95% CI: (0.595;0.672)
PTEN_Pathway_Angiogenesis_and_Tumorigenesis	0.554; 95% CI: (0.536;0.572)	0.67; 95% CI: (0.652;0.688)	0.511; 95% CI: (0.529;0.55)	0.683; 95% CI: (0.652;0.715)	0.831; 95% CI: (0.813;0.85)	0.635; 95% CI: (0.617;0.653)	0.761; 95% CI: (0.74;0.782)	0.518; 95% CI: (0.516;0.551)	0.758; 95% CI: (0.739;0.776)	0.686; 95% CI: (0.668;0.705)	0.673; 95% CI: (0.646;0.7)	0.753; 95% CI: (0.725;0.78)	0.594; 95% CI: (0.562;0.626)	0.82; 95% CI: (0.805;0.836)	0.619; 95% CI: (0.58;0.657)
PTEN_Pathway_Ca2+_Signaling	0.554; 95% CI: (0.536;0.572)	0.67; 95% CI: (0.652;0.688)	0.511; 95% CI: (0.529;0.55)	0.683; 95% CI: (0.652;0.715)	0.831; 95% CI: (0.813;0.85)	0.635; 95% CI: (0.617;0.653)	0.761; 95% CI: (0.74;0.782)	0.518; 95% CI: (0.516;0.551)	0.758; 95% CI: (0.739;0.776)	0.686; 95% CI: (0.668;0.705)	0.673; 95% CI: (0.646;0.7)	0.753; 95% CI: (0.725;0.78)	0.594; 95% CI: (0.562;0.626)	0.82; 95% CI: (0.805;0.836)	0.619; 95% CI: (0.58;0.657)
PTEN_Pathway_Cell_Cycle	0.533; 95% CI: (0.514;0.552)	0.62; 95% CI: (0.602;0.638)	0.535; 95% CI: (0.504;0.575)	0.706; 95% CI: (0.671;0.74)	0.752; 95% CI: (0.737;0.766)	0.618; 95% CI: (0.599;0.636)	0.726; 95% CI: (0.705;0.748)	0.538; 95% CI: (0.503;0.573)	0.689; 95% CI: (0.667;0.71)	0.65; 95% CI: (0.631;0.668)	0.648; 95% CI: (0.622;0.674)	0.703; 95% CI: (0.675;0.731)	0.555; 95% CI: (0.521;0.589)	0.748; 95% CI: (0.735;0.761)	0.594; 95% CI: (0.551;0.638)
PTEN_Pathway_Cell_Survival	0.53; 95% CI: (0.514;0.546)	0.556; 95% CI: (0.539;0.572)	0.505; 95% CI: (0.53;0.539)	0.788; 95% CI: (0.755;0.821)	0.643; 95% CI: (0.634;0.652)	0.591; 95% CI: (0.577;0.605)	0.606; 95% CI: (0.584;0.628)	0.595; 95% CI: (0.573;0.617)	0.526; 95% CI: (0.506;0.547)	0.63; 95% CI: (0.619;0.641)	0.603; 95% CI: (0.584;0.621)	0.665; 95% CI: (0.639;0.692)	0.505; 95% CI: (0.524;0.533)	0.62; 95% CI: (0.598;0.642)	0.565; 95% CI: (0.532;0.598)
PTEN_Pathway_Differentiation	0.517; 95% CI: (0.503;0.536)	0.644; 95% CI: (0.625;0.662)	0.535; 95% CI: (0.506;0.575)	0.694; 95% CI: (0.659;0.729)	0.777; 95% CI: (0.762;0.791)	0.642; 95% CI: (0.623;0.661)	0.722; 95% CI: (0.7;0.744)	0.557; 95% CI: (0.522;0.592)	0.682; 95% CI: (0.659;0.704)	0.677; 95% CI: (0.659;0.696)	0.666; 95% CI: (0.639;0.692)	0.748; 95% CI: (0.723;0.774)	0.538; 95% CI: (0.503;0.573)	0.579; 95% CI: (0.56;0.598)	0.577; 95% CI: (0.531;0.622)
PTEN_Pathway_Growth	0.533; 95% CI: (0.514;0.552)	0.62; 95% CI: (0.602;0.638)	0.535; 95% CI: (0.504;0.575)	0.706; 95% CI: (0.671;0.74)	0.752; 95% CI: (0.737;0.766)	0.618; 95% CI: (0.599;0.636)	0.726; 95% CI: (0.705;0.748)	0.538; 95% CI: (0.503;0.573)	0.689; 95% CI: (0.667;0.71)	0.65; 95% CI: (0.631;0.668)	0.648; 95% CI: (0.622;0.674)	0.703; 95% CI: (0.675;0.731)	0.555; 95% CI: (0.521;0.589)	0.748; 95% CI: (0.735;0.761)	0.594; 95% CI: (0.551;0.638)
PTEN_Pathway_Migration	0.569; 95% CI: (0.551;0.588)	0.648; 95% CI: (0.629;0.666)	0.501; 95% CI: (0.54;0.543)	0.753; 95% CI: (0.724;0.782)	0.785; 95% CI: (0.77;0.801)	0.657; 95% CI: (0.638;0.676)	0.702; 95% CI: (0.679;0.725)	0.545; 95% CI: (0.509;0.582)	0.659; 95% CI: (0.636;0.681)	0.704; 95% CI: (0.686;0.722)	0.67; 95% CI: (0.642;0.697)	0.739; 95% CI: (0.713;0.765)	0.534; 95% CI: (0.502;0.57)	0.599; 95% CI: (0.58;0.619)	0.581; 95% CI: (0.535;0.627)
PTEN_Pathway_Proliferation	0.581; 95% CI: (0.562;0.599)	0.65; 95% CI: (0.632;0.669)	0.51; 95% CI: (0.531;0.551)	0.764; 95% CI: (0.737;0.792)	0.795; 95% CI: (0.781;0.809)	0.654; 95% CI: (0.635;0.673)	0.703; 95% CI: (0.68;0.726)	0.549; 95% CI: (0.513;0.586)	0.656; 95% CI: (0.633;0.679)	0.709; 95% CI: (0.691;0.727)	0.678; 95% CI: (0.651;0.706)	0.722; 95% CI: (0.696;0.748)	0.533; 95% CI: (0.503;0.569)	0.602; 95% CI: (0.582;0.621)	0.592; 95% CI: (0.547;0.638)
PTEN_Pathway_Proliferation_CyclinA2_Geminin_AuroraA_PLK1	0.517; 95% CI: (0.501;0.534)	0.615; 95% CI: (0.598;0.632)	0.528; 95% CI: (0.509;0.564)	0.75; 95% CI: (0.718;0.782)	0.725; 95% CI: (0.715;0.735)	0.635; 95% CI: (0.618;0.652)	0.727; 95% CI: (0.706;0.748)	0.576; 95% CI: (0.544;0.607)	0.695; 95% CI: (0.672;0.717)	0.645; 95% CI: (0.628;0.662)	0.615; 95% CI: (0.589;0.64)	0.686; 95% CI: (0.657;0.715)	0.602; 95% CI: (0.57;0.634)	0.71; 95% CI: (0.697;0.723)	0.558; 95% CI: (0.518;0.598)
PTEN_Pathway_Senescence_Ets2_p16	0.517; 95% CI: (0.501;0.534)	0.615; 95% CI: (0.598;0.632)	0.528; 95% CI: (0.509;0.564)	0.75; 95% CI: (0.718;0.782)	0.725; 95% CI: (0.715;0.735)	0.635; 95% CI: (0.618;0.652)	0.727; 95% CI: (0.706;0.748)	0.576; 95% CI: (0.544;0.607)	0.695; 95% CI: (0.672;0.717)	0.645; 95% CI: (0.628;0.662)	0.615; 95% CI: (0.589;0.64)	0.686; 95% CI: (0.657;0.715)	0.602; 95% CI: (0.57;0.634)	0.71; 95% CI: (0.697;0.723)	0.558; 95% CI: (0.518;0.598)
RANK_Signaling_in_Osteoclasts_Pathway	0.588; 95% CI: (0.569;0.607)	0.648; 95% CI: (0.63;0.666)	0.54; 95% CI: (0.501;0.58)	0.763; 95% CI: (0.733;0.793)	0.756; 95% CI: (0.741;0.771)	0.658; 95% CI: (0.64;0.676)	0.697; 95% CI: (0.675;0.72)	0.586; 95% CI: (0.551;0.621)	0.624; 95% CI: (0.601;0.647)	0.688; 95% CI: (0.671;0.706)	0.699; 95% CI: (0.676;0.721)	0.691; 95% CI: (0.664;0.718)	0.541; 95% CI: (0.505;0.577)	0.559; 95% CI: (0.54;0.579)	0.579; 95% CI: (0.532;0.627)
RANK_Signaling_in_Osteoclasts_Pathway_Inhibition_of_Death	0.586; 95% CI: (0.566;0.605)	0.615; 95% CI: (0.598;0.632)	0.525; 95% CI: (0.516;0.565)	0.805; 95% CI: (0.775;0.836)	0.714; 95% CI: (0.704;0.723)	0.653; 95% CI: (0.637;0.668)	0.644; 95% CI: (0.621;0.667)	0.609; 95% CI: (0.58;0.638)	0.56; 95% CI: (0.537;0.582)	0.669; 95% CI: (0.655;0.684)	0.657; 95% CI: (0.636;0.678)	0.685; 95% CI: (0.659;0.711)	0.516; 95% CI: (0.517;0.549)	0.526; 95% CI: (0.505;0.547)	0.501; 95% CI: (0.54;0.543)
RANK_Signaling_in_Osteoclasts_Pathway_Resorption	0.604; 95% CI: (0.585;0.623)	0.586; 95% CI: (0.569;0.603)	0.525; 95% CI: (0.513;0.563)	0.81; 95% CI: (0.781;0.839)	0.678; 95% CI: (0.665;0.692)	0.626; 95% CI: (0.611;0.641)	0.666; 95% CI: (0.644;0.688)	0.58; 95% CI: (0.551;0.61)	0.589; 95% CI: (0.567;0.611)	0.642; 95% CI: (0.627;0.657)	0.643; 95% CI: (0.624;0.662)	0.57; 95% CI: (0.541;0.599)	0.552; 95% CI: (0.52;0.585)	0.683; 95% CI: (0.672;0.694)	0.537; 95% CI: (0.506;0.58)
Ras_Pathway	0.569; 95% CI: (0.552;0.585)	0.704; 95% CI: (0.687;0.721)	0.529; 95% CI: (0.508;0.566)	0.708; 95% CI: (0.679;0.736)	0.81; 95% CI: (0.785;0.835)	0.668; 95% CI: (0.65;0.687)	0.79; 95% CI: (0.769;0.811)	0.501; 95% CI: (0.531;0.532)	0.754; 95% CI: (0.736;0.772)	0.74; 95% CI: (0.723;0.758)	0.718; 95% CI: (0.691;0.744)	0.743; 95% CI: (0.716;0.771)	0.622; 95% CI: (0.589;0.655)	0.761; 95% CI: (0.744;0.777)	0.627; 95% CI: (0.589;0.666)
Ras_Pathway_Apoptosis	0.559; 95% CI: (0.541;0.577)	0.58; 95% CI: (0.562;0.598)	0.505; 95% CI: (0.532;0.542)	0.832; 95% CI: (0.805;0.859)	0.661; 95% CI: (0.634;0.688)	0.655; 95% CI: (0.639;0.67)	0.759; 95% CI: (0.738;0.781)	0.615; 95% CI: (0.587;0.643)	0.615; 95% CI: (0.592;0.637)	0.683; 95% CI: (0.669;0.697)	0.666; 95% CI: (0.646;0.687)	0.596; 95% CI: (0.567;0.626)	0.521; 95% CI: (0.511;0.553)	0.645; 95% CI: (0.624;0.666)	0.535; 95% CI: (0.503;0.574)
Ras_Pathway_Cell-Cell_Junctions	0.511; 95% CI: (0.505;0.528)	0.648; 95% CI: (0.637;0.659)	0.524; 95% CI: (0.51;0.557)	0.61; 95% CI: (0.575;0.645)	0.602; 95% CI: (0.575;0.628)	0.605; 95% CI: (0.59;0.62)	0.767; 95% CI: (0.746;0.789)	0.549; 95% CI: (0.519;0.578)	0.648; 95% CI: (0.625;0.67)	0.629; 95% CI: (0.615;0.643)	0.624; 95% CI: (0.605;0.642)	0.627; 95% CI: (0.598;0.655)	0.543; 95% CI: (0.512;0.573)	0.592; 95% CI: (0.572;0.612)	0.507; 95% CI: (0.532;0.545)
reactome_Antigen_processing_Ubiquitination_Proteasome_degradation_Main_Pathway	0.54; 95% CI: (0.521;0.559)	0.731; 95% CI: (0.716;0.746)	0.535; 95% CI: (0.505;0.575)	0.625; 95% CI: (0.59;0.66)	0.772; 95% CI: (0.754;0.791)	0.513; 95% CI: (0.508;0.535)	0.769; 95% CI: (0.748;0.789)	0.516; 95% CI: (0.519;0.55)	0.714; 95% CI: (0.694;0.734)	0.676; 95% CI: (0.657;0.694)	0.649; 95% CI: (0.622;0.676)	0.635; 95% CI: (0.606;0.664)	0.549; 95% CI: (0.514;0.584)	0.787; 95% CI: (0.774;0.8)	0.657; 95% CI: (0.619;0.695)
reactome_Apoptotic_cleavage_of_cellular_proteins_Main_Pathway	0.529; 95% CI: (0.516;0.542)	0.591; 95% CI: (0.583;0.6)	0.526; 95% CI: (0.5;0.552)	0.528; 95% CI: (0.5;0.557)	0.593; 95% CI: (0.584;0.602)	0.564; 95% CI: (0.552;0.576)	0.838; 95% CI: (0.822;0.854)	0.555; 95% CI: (0.534;0.575)	0.522; 95% CI: (0.504;0.541)	0.578; 95% CI: (0.568;0.589)	0.577; 95% CI: (0.563;0.59)	0.546; 95% CI: (0.521;0.571)	0.527; 95% CI: (0.501;0.553)	0.598; 95% CI: (0.592;0.605)	0.512; 95% CI: (0.524;0.548)
reactome_Beta_catenin_phosphorylation_cascade_Main_Pathway	0.532; 95% CI: (0.519;0.546)	0.594; 95% CI: (0.586;0.603)	0.541; 95% CI: (0.516;0.566)	0.576; 95% CI: (0.544;0.607)	0.602; 95% CI: (0.595;0.608)	0.575; 95% CI: (0.564;0.587)	0.83; 95% CI: (0.814;0.847)	0.524; 95% CI: (0.502;0.551)	0.54; 95% CI: (0.521;0.56)	0.572; 95% CI: (0.56;0.585)	0.591; 95% CI: (0.579;0.602)	0.517; 95% CI: (0.507;0.54)	0.542; 95% CI: (0.514;0.569)	0.595; 95% CI: (0.586;0.604)	0.508; 95% CI: (0.526;0.542)
reactome_CD28_dependent_PI3K_Akt_signaling_Main_Pathway	0.615; 95% CI: (0.597;0.633)	0.59; 95% CI: (0.575;0.605)	0.544; 95% CI: (0.508;0.579)	0.817; 95% CI: (0.79;0.844)	0.655; 95% CI: (0.648;0.662)	0.604; 95% CI: (0.59;0.617)	0.647; 95% CI: (0.625;0.669)	0.565; 95% CI: (0.536;0.593)	0.561; 95% CI: (0.54;0.582)	0.63; 95% CI: (0.618;0.642)	0.609; 95% CI: (0.591;0.628)	0.511; 95% CI: (0.516;0.538)	0.537; 95% CI: (0.507;0.567)	0.647; 95% CI: (0.637;0.658)	0.519; 95% CI: (0.519;0.557)
reactome_Collagen_biosynthesis_and_modifying_enzymes_Main_Pathway	0.556; 95% CI: (0.538;0.574)	0.679; 95% CI: (0.663;0.695)	0.518; 95% CI: (0.519;0.555)	0.533; 95% CI: (0.502;0.569)	0.756; 95% CI: (0.739;0.772)	0.642; 95% CI: (0.624;0.66)	0.767; 95% CI: (0.747;0.786)	0.541; 95% CI: (0.508;0.575)	0.756; 95% CI: (0.737;0.776)	0.653; 95% CI: (0.634;0.671)	0.665; 95% CI: (0.641;0.69)	0.742; 95% CI: (0.713;0.772)	0.581; 95% CI: (0.549;0.614)	0.742; 95% CI: (0.726;0.757)	0.57; 95% CI: (0.528;0.612)
reactome_DAP12_signaling_Main_Pathway	0.549; 95% CI: (0.532;0.566)	0.624; 95% CI: (0.609;0.638)	0.501; 95% CI: (0.535;0.537)	0.775; 95% CI: (0.746;0.803)	0.632; 95% CI: (0.606;0.658)	0.647; 95% CI: (0.633;0.661)	0.752; 95% CI: (0.73;0.774)	0.569; 95% CI: (0.539;0.6)	0.628; 95% CI: (0.606;0.651)	0.653; 95% CI: (0.639;0.667)	0.647; 95% CI: (0.629;0.666)	0.596; 95% CI: (0.566;0.626)	0.531; 95% CI: (0.5;0.563)	0.626; 95% CI: (0.606;0.645)	0.55; 95% CI: (0.513;0.587)
reactome_Degradation_of_beta_catenin_by_the_destruction_complex_Main_Pathway	0.509; 95% CI: (0.509;0.527)	0.642; 95% CI: (0.63;0.654)	0.533; 95% CI: (0.502;0.568)	0.591; 95% CI: (0.556;0.625)	0.653; 95% CI: (0.639;0.667)	0.587; 95% CI: (0.57;0.603)	0.802; 95% CI: (0.786;0.818)	0.515; 95% CI: (0.519;0.549)	0.624; 95% CI: (0.602;0.646)	0.602; 95% CI: (0.586;0.618)	0.616; 95% CI: (0.596;0.637)	0.557; 95% CI: (0.529;0.586)	0.544; 95% CI: (0.512;0.575)	0.661; 95% CI: (0.65;0.671)	0.574; 95% CI: (0.528;0.619)
reactome_disassembly_of_the_destruction_complex_and_recruitment_of_AXIN_to_the_membrane_Main_Pathway	0.544; 95% CI: (0.528;0.56)	0.63; 95% CI: (0.619;0.641)	0.527; 95% CI: (0.505;0.559)	0.702; 95% CI: (0.67;0.734)	0.643; 95% CI: (0.634;0.653)	0.602; 95% CI: (0.588;0.616)	0.804; 95% CI: (0.788;0.82)	0.557; 95% CI: (0.521;0.593)	0.581; 95% CI: (0.559;0.603)	0.603; 95% CI: (0.588;0.617)	0.589; 95% CI: (0.569;0.61)	0.572; 95% CI: (0.544;0.6)	0.565; 95% CI: (0.534;0.596)	0.636; 95% CI: (0.625;0.647)	0.504; 95% CI: (0.537;0.545)
reactome_Downstream_signal_transduction_Main_Pathway	0.557; 95% CI: (0.539;0.574)	0.62; 95% CI: (0.605;0.635)	0.52; 95% CI: (0.516;0.556)	0.794; 95% CI: (0.765;0.822)	0.603; 95% CI: (0.575;0.631)	0.637; 95% CI: (0.623;0.651)	0.742; 95% CI: (0.72;0.764)	0.61; 95% CI: (0.585;0.635)	0.594; 95% CI: (0.571;0.617)	0.655; 95% CI: (0.642;0.668)	0.629; 95% CI: (0.609;0.649)	0.589; 95% CI: (0.56;0.618)	0.521; 95% CI: (0.509;0.552)	0.61; 95% CI: (0.59;0.63)	0.55; 95% CI: (0.514;0.585)
reactome_Downstream_TCR_signaling_Main_Pathway	0.595; 95% CI: (0.576;0.613)	0.55; 95% CI: (0.531;0.569)	0.534; 95% CI: (0.503;0.572)	0.852; 95% CI: (0.827;0.878)	0.7; 95% CI: (0.691;0.709)	0.615; 95% CI: (0.598;0.632)	0.657; 95% CI: (0.635;0.679)	0.598; 95% CI: (0.569;0.627)	0.585; 95% CI: (0.563;0.607)	0.656; 95% CI: (0.641;0.67)	0.632; 95% CI: (0.61;0.655)	0.592; 95% CI: (0.562;0.623)	0.517; 95% CI: (0.513;0.548)	0.699; 95% CI: (0.689;0.709)	0.502; 95% CI: (0.54;0.544)
reactome_FCERI_mediated_MAPK_activation_Main_Pathway	0.505; 95% CI: (0.511;0.521)	0.637; 95% CI: (0.626;0.649)	0.533; 95% CI: (0.5;0.566)	0.595; 95% CI: (0.56;0.631)	0.602; 95% CI: (0.576;0.627)	0.619; 95% CI: (0.606;0.632)	0.77; 95% CI: (0.749;0.791)	0.562; 95% CI: (0.534;0.59)	0.639; 95% CI: (0.617;0.662)	0.626; 95% CI: (0.612;0.64)	0.619; 95% CI: (0.6;0.637)	0.632; 95% CI: (0.603;0.661)	0.537; 95% CI: (0.507;0.567)	0.595; 95% CI: (0.576;0.614)	0.504; 95% CI: (0.535;0.544)
reactome_G_alpha_12_13_signalling_events_Main_Pathway	0.592; 95% CI: (0.574;0.61)	0.655; 95% CI: (0.638;0.673)	0.517; 95% CI: (0.523;0.558)	0.768; 95% CI: (0.739;0.796)	0.74; 95% CI: (0.722;0.758)	0.661; 95% CI: (0.643;0.679)	0.721; 95% CI: (0.701;0.742)	0.535; 95% CI: (0.5;0.571)	0.663; 95% CI: (0.641;0.684)	0.673; 95% CI: (0.655;0.691)	0.635; 95% CI: (0.607;0.662)	0.646; 95% CI: (0.615;0.676)	0.599; 95% CI: (0.565;0.634)	0.738; 95% CI: (0.723;0.754)	0.607; 95% CI: (0.563;0.651)
reactome_G_alpha_i_signalling_events_Main_Pathway	0.542; 95% CI: (0.523;0.561)	0.631; 95% CI: (0.612;0.649)	0.52; 95% CI: (0.518;0.559)	0.583; 95% CI: (0.547;0.619)	0.742; 95% CI: (0.722;0.762)	0.632; 95% CI: (0.613;0.651)	0.718; 95% CI: (0.698;0.739)	0.511; 95% CI: (0.524;0.546)	0.736; 95% CI: (0.715;0.756)	0.633; 95% CI: (0.613;0.653)	0.629; 95% CI: (0.603;0.655)	0.767; 95% CI: (0.74;0.794)	0.641; 95% CI: (0.609;0.673)	0.761; 95% CI: (0.748;0.775)	0.624; 95% CI: (0.582;0.665)
reactome_G_alpha_q_signalling_events_Main_Pathway	0.521; 95% CI: (0.503;0.539)	0.648; 95% CI: (0.63;0.666)	0.503; 95% CI: (0.536;0.542)	0.72; 95% CI: (0.691;0.749)	0.764; 95% CI: (0.747;0.782)	0.649; 95% CI: (0.631;0.667)	0.724; 95% CI: (0.703;0.745)	0.535; 95% CI: (0.502;0.571)	0.704; 95% CI: (0.682;0.726)	0.645; 95% CI: (0.626;0.665)	0.654; 95% CI: (0.627;0.681)	0.729; 95% CI: (0.7;0.757)	0.623; 95% CI: (0.59;0.657)	0.761; 95% CI: (0.747;0.776)	0.625; 95% CI: (0.585;0.665)
reactome_NCAM_signaling_for_neurite_out_growth_Main_Pathway	0.549; 95% CI: (0.533;0.565)	0.646; 95% CI: (0.633;0.658)	0.521; 95% CI: (0.513;0.555)	0.616; 95% CI: (0.581;0.652)	0.608; 95% CI: (0.581;0.635)	0.623; 95% CI: (0.609;0.637)	0.752; 95% CI: (0.73;0.774)	0.528; 95% CI: (0.504;0.56)	0.683; 95% CI: (0.662;0.705)	0.63; 95% CI: (0.615;0.644)	0.61; 95% CI: (0.589;0.632)	0.653; 95% CI: (0.625;0.681)	0.57; 95% CI: (0.54;0.6)	0.603; 95% CI: (0.582;0.623)	0.544; 95% CI: (0.504;0.583)
reactome_Nephrin_interactions_Main_Pathway	0.608; 95% CI: (0.589;0.627)	0.608; 95% CI: (0.593;0.624)	0.546; 95% CI: (0.508;0.584)	0.812; 95% CI: (0.783;0.841)	0.677; 95% CI: (0.666;0.688)	0.63; 95% CI: (0.616;0.644)	0.696; 95% CI: (0.675;0.717)	0.579; 95% CI: (0.551;0.608)	0.593; 95% CI: (0.571;0.616)	0.644; 95% CI: (0.63;0.657)	0.642; 95% CI: (0.624;0.66)	0.524; 95% CI: (0.503;0.552)	0.573; 95% CI: (0.542;0.605)	0.682; 95% CI: (0.673;0.692)	0.53; 95% CI: (0.511;0.571)
reactome_O_glycosylation_of_TSR_domain_containing_proteins_Main_Pathway	0.508; 95% CI: (0.51;0.526)	0.664; 95% CI: (0.649;0.678)	0.52; 95% CI: (0.516;0.557)	0.523; 95% CI: (0.512;0.557)	0.703; 95% CI: (0.689;0.718)	0.617; 95% CI: (0.6;0.634)	0.755; 95% CI: (0.735;0.775)	0.531; 95% CI: (0.502;0.565)	0.722; 95% CI: (0.7;0.743)	0.622; 95% CI: (0.604;0.64)	0.627; 95% CI: (0.603;0.651)	0.71; 95% CI: (0.681;0.739)	0.608; 95% CI: (0.575;0.641)	0.698; 95% CI: (0.684;0.711)	0.586; 95% CI: (0.544;0.628)
reactome_Olfactory_Signaling_Pathway_Main_Pathway	0.593; 95% CI: (0.575;0.611)	0.606; 95% CI: (0.587;0.625)	0.54; 95% CI: (0.5;0.579)	0.625; 95% CI: (0.591;0.659)	0.796; 95% CI: (0.778;0.814)	0.645; 95% CI: (0.626;0.663)	0.62; 95% CI: (0.599;0.642)	0.521; 95% CI: (0.514;0.555)	0.823; 95% CI: (0.805;0.841)	0.614; 95% CI: (0.593;0.634)	0.61; 95% CI: (0.583;0.637)	0.835; 95% CI: (0.808;0.862)	0.698; 95% CI: (0.669;0.726)	0.785; 95% CI: (0.77;0.8)	0.663; 95% CI: (0.627;0.698)
reactome_Oxidative_Stress_Induced_Senescence_Main_Pathway	0.536; 95% CI: (0.516;0.556)	0.54; 95% CI: (0.517;0.563)	0.592; 95% CI: (0.558;0.626)	0.576; 95% CI: (0.543;0.609)	0.712; 95% CI: (0.689;0.735)	0.708; 95% CI: (0.693;0.722)	0.73; 95% CI: (0.709;0.751)	0.54; 95% CI: (0.503;0.577)	0.7; 95% CI: (0.678;0.722)	0.572; 95% CI: (0.552;0.591)	0.675; 95% CI: (0.65;0.699)	0.52; 95% CI: (0.509;0.549)	0.585; 95% CI: (0.552;0.617)	0.762; 95% CI: (0.752;0.772)	0.531; 95% CI: (0.512;0.574)
reactome_PI_3K_cascade_Main_Pathway	0.599; 95% CI: (0.581;0.617)	0.57; 95% CI: (0.555;0.584)	0.549; 95% CI: (0.514;0.583)	0.811; 95% CI: (0.783;0.839)	0.611; 95% CI: (0.597;0.625)	0.6; 95% CI: (0.587;0.612)	0.6; 95% CI: (0.579;0.622)	0.568; 95% CI: (0.545;0.592)	0.54; 95% CI: (0.52;0.561)	0.615; 95% CI: (0.604;0.626)	0.593; 95% CI: (0.575;0.611)	0.534; 95% CI: (0.507;0.561)	0.545; 95% CI: (0.516;0.574)	0.633; 95% CI: (0.625;0.641)	0.505; 95% CI: (0.531;0.541)
reactome_Rho_GTPase_cycle_Main_Pathway	0.548; 95% CI: (0.53;0.567)	0.69; 95% CI: (0.673;0.707)	0.518; 95% CI: (0.522;0.558)	0.591; 95% CI: (0.554;0.628)	0.764; 95% CI: (0.746;0.783)	0.634; 95% CI: (0.616;0.653)	0.753; 95% CI: (0.733;0.774)	0.508; 95% CI: (0.527;0.543)	0.729; 95% CI: (0.709;0.749)	0.657; 95% CI: (0.638;0.675)	0.648; 95% CI: (0.62;0.675)	0.705; 95% CI: (0.677;0.734)	0.619; 95% CI: (0.587;0.652)	0.753; 95% CI: (0.737;0.77)	0.628; 95% CI: (0.585;0.671)
reactome_Role_of_LAT2_NTAL_LAB_on_calcium_mobilization_Main_Pathway	0.625; 95% CI: (0.606;0.643)	0.565; 95% CI: (0.55;0.58)	0.546; 95% CI: (0.51;0.582)	0.84; 95% CI: (0.813;0.867)	0.637; 95% CI: (0.629;0.645)	0.606; 95% CI: (0.594;0.618)	0.623; 95% CI: (0.602;0.645)	0.577; 95% CI: (0.553;0.601)	0.513; 95% CI: (0.506;0.533)	0.614; 95% CI: (0.602;0.626)	0.593; 95% CI: (0.575;0.611)	0.502; 95% CI: (0.524;0.527)	0.539; 95% CI: (0.51;0.568)	0.638; 95% CI: (0.629;0.646)	0.53; 95% CI: (0.504;0.564)
reactome_Role_of_phospholipids_in_phagocytosis_Main_Pathway	0.615; 95% CI: (0.596;0.633)	0.6; 95% CI: (0.583;0.616)	0.505; 95% CI: (0.532;0.542)	0.81; 95% CI: (0.781;0.838)	0.688; 95% CI: (0.679;0.697)	0.622; 95% CI: (0.606;0.637)	0.682; 95% CI: (0.66;0.703)	0.569; 95% CI: (0.538;0.599)	0.582; 95% CI: (0.559;0.604)	0.643; 95% CI: (0.628;0.657)	0.633; 95% CI: (0.612;0.654)	0.571; 95% CI: (0.541;0.601)	0.548; 95% CI: (0.516;0.579)	0.685; 95% CI: (0.675;0.696)	0.515; 95% CI: (0.527;0.557)
reactome_Separation_of_Sister_Chromatids_Main_Pathway	0.561; 95% CI: (0.542;0.58)	0.698; 95% CI: (0.683;0.713)	0.502; 95% CI: (0.54;0.544)	0.604; 95% CI: (0.567;0.64)	0.717; 95% CI: (0.695;0.738)	0.558; 95% CI: (0.537;0.578)	0.739; 95% CI: (0.719;0.76)	0.531; 95% CI: (0.506;0.567)	0.698; 95% CI: (0.676;0.719)	0.634; 95% CI: (0.614;0.653)	0.632; 95% CI: (0.604;0.66)	0.619; 95% CI: (0.589;0.648)	0.561; 95% CI: (0.527;0.595)	0.753; 95% CI: (0.74;0.766)	0.657; 95% CI: (0.615;0.698)
reactome_SHC1_events_in_ERBB2_signaling_Main_Pathway	0.559; 95% CI: (0.545;0.573)	0.555; 95% CI: (0.54;0.57)	0.546; 95% CI: (0.519;0.574)	0.589; 95% CI: (0.556;0.623)	0.568; 95% CI: (0.542;0.594)	0.609; 95% CI: (0.597;0.62)	0.761; 95% CI: (0.739;0.782)	0.581; 95% CI: (0.559;0.603)	0.638; 95% CI: (0.617;0.66)	0.61; 95% CI: (0.598;0.622)	0.61; 95% CI: (0.595;0.625)	0.597; 95% CI: (0.57;0.625)	0.513; 95% CI: (0.514;0.54)	0.567; 95% CI: (0.548;0.586)	0.537; 95% CI: (0.505;0.569)
reactome_SHC1_events_in_ERBB4_signaling_Main_Pathway	0.551; 95% CI: (0.538;0.564)	0.613; 95% CI: (0.606;0.621)	0.555; 95% CI: (0.531;0.579)	0.593; 95% CI: (0.561;0.626)	0.548; 95% CI: (0.523;0.572)	0.591; 95% CI: (0.58;0.602)	0.778; 95% CI: (0.758;0.799)	0.567; 95% CI: (0.546;0.587)	0.607; 95% CI: (0.586;0.629)	0.597; 95% CI: (0.587;0.607)	0.595; 95% CI: (0.582;0.608)	0.603; 95% CI: (0.576;0.629)	0.523; 95% CI: (0.503;0.548)	0.548; 95% CI: (0.53;0.565)	0.547; 95% CI: (0.519;0.575)
reactome_Signaling_by_constitutively_active_EGFR_Main_Pathway	0.547; 95% CI: (0.529;0.564)	0.56; 95% CI: (0.543;0.578)	0.503; 95% CI: (0.532;0.537)	0.789; 95% CI: (0.761;0.818)	0.612; 95% CI: (0.584;0.639)	0.652; 95% CI: (0.639;0.665)	0.725; 95% CI: (0.702;0.748)	0.608; 95% CI: (0.583;0.633)	0.613; 95% CI: (0.591;0.635)	0.661; 95% CI: (0.649;0.674)	0.638; 95% CI: (0.619;0.657)	0.565; 95% CI: (0.536;0.594)	0.511; 95% CI: (0.519;0.541)	0.615; 95% CI: (0.595;0.635)	0.535; 95% CI: (0.502;0.571)
reactome_Signaling_by_FGFR_mutants_Main_Pathway	0.545; 95% CI: (0.529;0.562)	0.613; 95% CI: (0.599;0.627)	0.513; 95% CI: (0.521;0.547)	0.785; 95% CI: (0.757;0.813)	0.61; 95% CI: (0.585;0.635)	0.636; 95% CI: (0.623;0.649)	0.73; 95% CI: (0.708;0.753)	0.602; 95% CI: (0.578;0.626)	0.601; 95% CI: (0.578;0.624)	0.649; 95% CI: (0.636;0.661)	0.63; 95% CI: (0.613;0.648)	0.589; 95% CI: (0.56;0.618)	0.526; 95% CI: (0.503;0.556)	0.601; 95% CI: (0.582;0.62)	0.535; 95% CI: (0.501;0.571)
reactome_Signaling_by_FGFR1_fusion_mutants_Main_Pathway	0.627; 95% CI: (0.609;0.646)	0.592; 95% CI: (0.577;0.608)	0.542; 95% CI: (0.505;0.58)	0.821; 95% CI: (0.791;0.85)	0.658; 95% CI: (0.648;0.667)	0.613; 95% CI: (0.599;0.626)	0.669; 95% CI: (0.647;0.691)	0.593; 95% CI: (0.569;0.617)	0.531; 95% CI: (0.51;0.552)	0.627; 95% CI: (0.614;0.64)	0.601; 95% CI: (0.581;0.622)	0.526; 95% CI: (0.5;0.552)	0.537; 95% CI: (0.507;0.567)	0.656; 95% CI: (0.646;0.665)	0.511; 95% CI: (0.526;0.548)
reactome_Signaling_by_SCF_KIT_Main_Pathway	0.563; 95% CI: (0.546;0.581)	0.638; 95% CI: (0.623;0.654)	0.505; 95% CI: (0.532;0.542)	0.775; 95% CI: (0.746;0.804)	0.621; 95% CI: (0.592;0.65)	0.652; 95% CI: (0.637;0.667)	0.764; 95% CI: (0.743;0.786)	0.611; 95% CI: (0.582;0.639)	0.636; 95% CI: (0.614;0.659)	0.676; 95% CI: (0.662;0.69)	0.654; 95% CI: (0.634;0.674)	0.625; 95% CI: (0.596;0.655)	0.529; 95% CI: (0.503;0.561)	0.637; 95% CI: (0.617;0.658)	0.535; 95% CI: (0.504;0.573)
reactome_Synthesis_of_PIPs_at_the_plasma_membrane_Main_Pathway	0.602; 95% CI: (0.583;0.621)	0.556; 95% CI: (0.537;0.575)	0.518; 95% CI: (0.52;0.557)	0.857; 95% CI: (0.83;0.885)	0.714; 95% CI: (0.705;0.723)	0.63; 95% CI: (0.614;0.647)	0.667; 95% CI: (0.644;0.689)	0.586; 95% CI: (0.556;0.616)	0.586; 95% CI: (0.564;0.608)	0.668; 95% CI: (0.653;0.682)	0.633; 95% CI: (0.61;0.656)	0.594; 95% CI: (0.565;0.623)	0.535; 95% CI: (0.503;0.567)	0.706; 95% CI: (0.695;0.717)	0.534; 95% CI: (0.508;0.575)
reactome_Tie2_Signaling_Main_Pathway	0.555; 95% CI: (0.537;0.572)	0.621; 95% CI: (0.607;0.635)	0.5; 95% CI: (0.535;0.535)	0.793; 95% CI: (0.764;0.821)	0.593; 95% CI: (0.564;0.621)	0.644; 95% CI: (0.63;0.657)	0.75; 95% CI: (0.728;0.772)	0.598; 95% CI: (0.572;0.624)	0.593; 95% CI: (0.57;0.616)	0.65; 95% CI: (0.636;0.663)	0.637; 95% CI: (0.618;0.655)	0.595; 95% CI: (0.566;0.624)	0.521; 95% CI: (0.509;0.551)	0.608; 95% CI: (0.589;0.628)	0.563; 95% CI: (0.528;0.598)
reactome_VEGFA_VEGFR2_Pathway_Main_Pathway	0.591; 95% CI: (0.573;0.61)	0.635; 95% CI: (0.619;0.652)	0.544; 95% CI: (0.506;0.582)	0.766; 95% CI: (0.738;0.795)	0.714; 95% CI: (0.7;0.727)	0.638; 95% CI: (0.621;0.655)	0.702; 95% CI: (0.681;0.724)	0.564; 95% CI: (0.53;0.597)	0.627; 95% CI: (0.605;0.649)	0.657; 95% CI: (0.641;0.674)	0.636; 95% CI: (0.612;0.66)	0.645; 95% CI: (0.614;0.676)	0.58; 95% CI: (0.545;0.614)	0.718; 95% CI: (0.707;0.73)	0.554; 95% CI: (0.509;0.599)
reactome_VEGFR2_mediated_cell_proliferation_Main_Pathway	0.527; 95% CI: (0.511;0.542)	0.619; 95% CI: (0.607;0.632)	0.541; 95% CI: (0.509;0.572)	0.605; 95% CI: (0.57;0.64)	0.59; 95% CI: (0.564;0.616)	0.614; 95% CI: (0.6;0.627)	0.769; 95% CI: (0.748;0.79)	0.566; 95% CI: (0.54;0.592)	0.641; 95% CI: (0.619;0.663)	0.616; 95% CI: (0.603;0.63)	0.627; 95% CI: (0.611;0.643)	0.647; 95% CI: (0.619;0.675)	0.518; 95% CI: (0.51;0.547)	0.583; 95% CI: (0.564;0.602)	0.507; 95% CI: (0.53;0.544)
Regulation_of_Cell_Migration_by_Platelet-derived_Growth_Factors	0.584; 95% CI: (0.566;0.603)	0.6; 95% CI: (0.584;0.615)	0.538; 95% CI: (0.501;0.574)	0.806; 95% CI: (0.778;0.834)	0.668; 95% CI: (0.656;0.679)	0.623; 95% CI: (0.609;0.638)	0.664; 95% CI: (0.642;0.686)	0.577; 95% CI: (0.548;0.606)	0.586; 95% CI: (0.564;0.607)	0.637; 95% CI: (0.623;0.651)	0.623; 95% CI: (0.603;0.642)	0.587; 95% CI: (0.557;0.617)	0.579; 95% CI: (0.547;0.611)	0.675; 95% CI: (0.666;0.684)	0.515; 95% CI: (0.525;0.555)
Regulation_of_Cytoskeleton_Remodeling_by_TGF_and_WNT	0.594; 95% CI: (0.576;0.612)	0.668; 95% CI: (0.65;0.685)	0.523; 95% CI: (0.516;0.562)	0.763; 95% CI: (0.735;0.791)	0.772; 95% CI: (0.753;0.791)	0.643; 95% CI: (0.624;0.662)	0.72; 95% CI: (0.699;0.741)	0.538; 95% CI: (0.502;0.573)	0.693; 95% CI: (0.671;0.714)	0.682; 95% CI: (0.664;0.701)	0.648; 95% CI: (0.619;0.677)	0.672; 95% CI: (0.643;0.702)	0.572; 95% CI: (0.538;0.605)	0.752; 95% CI: (0.734;0.77)	0.6; 95% CI: (0.555;0.646)
Regulation_of_Repulsive_Axonal_Pathfinding	0.522; 95% CI: (0.503;0.541)	0.612; 95% CI: (0.594;0.631)	0.516; 95% CI: (0.524;0.557)	0.533; 95% CI: (0.505;0.571)	0.736; 95% CI: (0.719;0.754)	0.64; 95% CI: (0.621;0.658)	0.703; 95% CI: (0.68;0.725)	0.556; 95% CI: (0.518;0.593)	0.701; 95% CI: (0.679;0.722)	0.668; 95% CI: (0.65;0.687)	0.644; 95% CI: (0.618;0.67)	0.752; 95% CI: (0.726;0.778)	0.58; 95% CI: (0.545;0.615)	0.534; 95% CI: (0.514;0.554)	0.556; 95% CI: (0.509;0.603)
Role_of_KITLG_in_Haematopoiesis	0.622; 95% CI: (0.605;0.64)	0.625; 95% CI: (0.608;0.643)	0.523; 95% CI: (0.517;0.562)	0.767; 95% CI: (0.739;0.795)	0.701; 95% CI: (0.679;0.723)	0.645; 95% CI: (0.628;0.663)	0.717; 95% CI: (0.696;0.738)	0.574; 95% CI: (0.541;0.608)	0.64; 95% CI: (0.617;0.663)	0.684; 95% CI: (0.667;0.701)	0.654; 95% CI: (0.629;0.679)	0.635; 95% CI: (0.603;0.666)	0.541; 95% CI: (0.506;0.576)	0.722; 95% CI: (0.705;0.739)	0.523; 95% CI: (0.522;0.568)
Role_of_Small_GTPases_in_G1-S_Transition	0.617; 95% CI: (0.598;0.635)	0.627; 95% CI: (0.612;0.643)	0.537; 95% CI: (0.501;0.576)	0.801; 95% CI: (0.774;0.829)	0.688; 95% CI: (0.673;0.703)	0.633; 95% CI: (0.617;0.649)	0.679; 95% CI: (0.657;0.701)	0.582; 95% CI: (0.553;0.611)	0.604; 95% CI: (0.581;0.627)	0.662; 95% CI: (0.648;0.676)	0.625; 95% CI: (0.602;0.647)	0.588; 95% CI: (0.559;0.618)	0.543; 95% CI: (0.511;0.575)	0.668; 95% CI: (0.652;0.684)	0.555; 95% CI: (0.51;0.599)
SMAD_Signaling_Network_Pathway	0.545; 95% CI: (0.527;0.564)	0.686; 95% CI: (0.67;0.701)	0.511; 95% CI: (0.526;0.549)	0.597; 95% CI: (0.561;0.634)	0.746; 95% CI: (0.729;0.763)	0.588; 95% CI: (0.569;0.607)	0.76; 95% CI: (0.739;0.78)	0.523; 95% CI: (0.512;0.557)	0.687; 95% CI: (0.666;0.708)	0.655; 95% CI: (0.637;0.674)	0.652; 95% CI: (0.626;0.679)	0.683; 95% CI: (0.655;0.711)	0.591; 95% CI: (0.556;0.625)	0.743; 95% CI: (0.729;0.757)	0.654; 95% CI: (0.613;0.695)
SPP1_Pathway_in_Osteoclasts	0.601; 95% CI: (0.582;0.619)	0.593; 95% CI: (0.577;0.609)	0.534; 95% CI: (0.503;0.572)	0.798; 95% CI: (0.77;0.826)	0.672; 95% CI: (0.659;0.685)	0.617; 95% CI: (0.601;0.632)	0.661; 95% CI: (0.639;0.683)	0.567; 95% CI: (0.536;0.597)	0.579; 95% CI: (0.557;0.601)	0.641; 95% CI: (0.627;0.656)	0.63; 95% CI: (0.61;0.649)	0.562; 95% CI: (0.532;0.592)	0.56; 95% CI: (0.527;0.593)	0.672; 95% CI: (0.66;0.683)	0.539; 95% CI: (0.504;0.582)
STAT3_Pathway	0.506; 95% CI: (0.513;0.525)	0.67; 95% CI: (0.651;0.688)	0.51; 95% CI: (0.53;0.55)	0.598; 95% CI: (0.56;0.635)	0.726; 95% CI: (0.697;0.754)	0.664; 95% CI: (0.646;0.683)	0.773; 95% CI: (0.753;0.794)	0.555; 95% CI: (0.521;0.59)	0.718; 95% CI: (0.696;0.739)	0.682; 95% CI: (0.663;0.701)	0.668; 95% CI: (0.642;0.695)	0.759; 95% CI: (0.734;0.785)	0.562; 95% CI: (0.528;0.596)	0.589; 95% CI: (0.57;0.608)	0.588; 95% CI: (0.544;0.631)
superpathway_of_D-imyoi-inositol_145-trisphosphate_metabolism	0.5; 95% CI: (0.516;0.516)	0.539; 95% CI: (0.523;0.554)	0.502; 95% CI: (0.53;0.534)	0.789; 95% CI: (0.758;0.821)	0.617; 95% CI: (0.607;0.627)	0.569; 95% CI: (0.555;0.583)	0.626; 95% CI: (0.605;0.647)	0.563; 95% CI: (0.538;0.587)	0.555; 95% CI: (0.535;0.575)	0.594; 95% CI: (0.582;0.606)	0.584; 95% CI: (0.567;0.602)	0.576; 95% CI: (0.549;0.603)	0.514; 95% CI: (0.514;0.541)	0.619; 95% CI: (0.61;0.628)	0.525; 95% CI: (0.513;0.562)
superpathway_of_inositol_phosphate_compounds	0.603; 95% CI: (0.584;0.621)	0.595; 95% CI: (0.576;0.614)	0.519; 95% CI: (0.52;0.558)	0.825; 95% CI: (0.798;0.852)	0.754; 95% CI: (0.739;0.769)	0.645; 95% CI: (0.627;0.663)	0.694; 95% CI: (0.672;0.716)	0.572; 95% CI: (0.539;0.606)	0.648; 95% CI: (0.626;0.67)	0.695; 95% CI: (0.678;0.711)	0.653; 95% CI: (0.627;0.678)	0.678; 95% CI: (0.649;0.708)	0.533; 95% CI: (0.502;0.568)	0.759; 95% CI: (0.748;0.771)	0.577; 95% CI: (0.535;0.618)
TGF-Beta_Pathway	0.563; 95% CI: (0.545;0.58)	0.663; 95% CI: (0.646;0.681)	0.502; 95% CI: (0.537;0.54)	0.727; 95% CI: (0.7;0.755)	0.759; 95% CI: (0.731;0.787)	0.667; 95% CI: (0.648;0.685)	0.794; 95% CI: (0.774;0.814)	0.561; 95% CI: (0.529;0.594)	0.723; 95% CI: (0.703;0.743)	0.71; 95% CI: (0.692;0.729)	0.695; 95% CI: (0.669;0.72)	0.69; 95% CI: (0.66;0.72)	0.6; 95% CI: (0.566;0.633)	0.747; 95% CI: (0.727;0.767)	0.592; 95% CI: (0.55;0.634)
TGF-Beta_Pathway_Epithelial_Mesenchymal_Transdifferentiation	0.623; 95% CI: (0.604;0.642)	0.569; 95% CI: (0.553;0.585)	0.535; 95% CI: (0.502;0.573)	0.838; 95% CI: (0.81;0.866)	0.663; 95% CI: (0.656;0.67)	0.621; 95% CI: (0.608;0.634)	0.645; 95% CI: (0.623;0.667)	0.581; 95% CI: (0.555;0.606)	0.543; 95% CI: (0.523;0.564)	0.634; 95% CI: (0.622;0.647)	0.614; 95% CI: (0.595;0.633)	0.531; 95% CI: (0.504;0.557)	0.534; 95% CI: (0.504;0.564)	0.653; 95% CI: (0.643;0.664)	0.501; 95% CI: (0.537;0.539)
TGF-beta_Signaling_in_EpithelialвЂ“mesenchymal_transition	0.611; 95% CI: (0.593;0.629)	0.634; 95% CI: (0.618;0.65)	0.514; 95% CI: (0.524;0.551)	0.804; 95% CI: (0.777;0.831)	0.719; 95% CI: (0.709;0.729)	0.64; 95% CI: (0.623;0.656)	0.687; 95% CI: (0.665;0.71)	0.505; 95% CI: (0.529;0.539)	0.603; 95% CI: (0.579;0.626)	0.672; 95% CI: (0.658;0.687)	0.619; 95% CI: (0.595;0.644)	0.568; 95% CI: (0.538;0.597)	0.59; 95% CI: (0.556;0.624)	0.686; 95% CI: (0.669;0.702)	0.585; 95% CI: (0.539;0.631)
TRAF_Pathway	0.603; 95% CI: (0.584;0.621)	0.623; 95% CI: (0.605;0.64)	0.54; 95% CI: (0.501;0.58)	0.763; 95% CI: (0.733;0.792)	0.753; 95% CI: (0.739;0.766)	0.637; 95% CI: (0.619;0.655)	0.691; 95% CI: (0.669;0.713)	0.56; 95% CI: (0.525;0.594)	0.652; 95% CI: (0.629;0.674)	0.668; 95% CI: (0.65;0.686)	0.656; 95% CI: (0.63;0.682)	0.645; 95% CI: (0.614;0.676)	0.571; 95% CI: (0.536;0.605)	0.745; 95% CI: (0.733;0.758)	0.609; 95% CI: (0.566;0.653)
TRAF_Pathway_Cell_Survival	0.615; 95% CI: (0.596;0.634)	0.566; 95% CI: (0.549;0.582)	0.529; 95% CI: (0.508;0.566)	0.829; 95% CI: (0.8;0.859)	0.662; 95% CI: (0.654;0.669)	0.617; 95% CI: (0.604;0.631)	0.638; 95% CI: (0.616;0.66)	0.576; 95% CI: (0.55;0.603)	0.551; 95% CI: (0.531;0.572)	0.63; 95% CI: (0.618;0.643)	0.618; 95% CI: (0.6;0.637)	0.539; 95% CI: (0.513;0.566)	0.534; 95% CI: (0.504;0.563)	0.657; 95% CI: (0.648;0.667)	0.513; 95% CI: (0.526;0.552)
TYROBP_Signaling_in_Natural_Killer_Cells	0.595; 95% CI: (0.577;0.613)	0.607; 95% CI: (0.589;0.624)	0.547; 95% CI: (0.508;0.586)	0.755; 95% CI: (0.727;0.783)	0.689; 95% CI: (0.672;0.707)	0.645; 95% CI: (0.629;0.662)	0.689; 95% CI: (0.667;0.71)	0.584; 95% CI: (0.553;0.616)	0.641; 95% CI: (0.618;0.664)	0.66; 95% CI: (0.644;0.676)	0.635; 95% CI: (0.611;0.659)	0.616; 95% CI: (0.585;0.648)	0.554; 95% CI: (0.521;0.587)	0.694; 95% CI: (0.677;0.71)	0.517; 95% CI: (0.528;0.562)
Ubiquitin-Proteasome_Dependent_Proteolysis_Pathway	0.567; 95% CI: (0.548;0.586)	0.705; 95% CI: (0.69;0.719)	0.508; 95% CI: (0.531;0.547)	0.592; 95% CI: (0.556;0.629)	0.731; 95% CI: (0.713;0.748)	0.575; 95% CI: (0.555;0.594)	0.759; 95% CI: (0.738;0.779)	0.508; 95% CI: (0.527;0.544)	0.688; 95% CI: (0.667;0.709)	0.644; 95% CI: (0.625;0.662)	0.628; 95% CI: (0.601;0.656)	0.631; 95% CI: (0.601;0.661)	0.558; 95% CI: (0.524;0.591)	0.743; 95% CI: (0.73;0.756)	0.627; 95% CI: (0.583;0.67)
VEGF_Pathway	0.567; 95% CI: (0.55;0.585)	0.657; 95% CI: (0.641;0.674)	0.509; 95% CI: (0.529;0.546)	0.752; 95% CI: (0.723;0.781)	0.694; 95% CI: (0.665;0.723)	0.656; 95% CI: (0.639;0.674)	0.776; 95% CI: (0.755;0.798)	0.595; 95% CI: (0.565;0.626)	0.686; 95% CI: (0.664;0.708)	0.695; 95% CI: (0.678;0.712)	0.681; 95% CI: (0.657;0.705)	0.66; 95% CI: (0.63;0.69)	0.556; 95% CI: (0.523;0.589)	0.691; 95% CI: (0.669;0.712)	0.543; 95% CI: (0.501;0.585)
VEGF_Pathway_Cell_Survival	0.621; 95% CI: (0.602;0.64)	0.571; 95% CI: (0.554;0.587)	0.542; 95% CI: (0.504;0.58)	0.835; 95% CI: (0.806;0.863)	0.664; 95% CI: (0.656;0.671)	0.622; 95% CI: (0.608;0.635)	0.644; 95% CI: (0.622;0.666)	0.581; 95% CI: (0.555;0.607)	0.55; 95% CI: (0.529;0.571)	0.636; 95% CI: (0.623;0.648)	0.616; 95% CI: (0.597;0.635)	0.531; 95% CI: (0.505;0.557)	0.532; 95% CI: (0.502;0.562)	0.654; 95% CI: (0.643;0.664)	0.506; 95% CI: (0.533;0.545)
VEGFR2_Signaling	0.603; 95% CI: (0.586;0.621)	0.662; 95% CI: (0.645;0.68)	0.526; 95% CI: (0.513;0.566)	0.758; 95% CI: (0.73;0.786)	0.766; 95% CI: (0.748;0.784)	0.64; 95% CI: (0.62;0.659)	0.733; 95% CI: (0.712;0.754)	0.526; 95% CI: (0.506;0.559)	0.668; 95% CI: (0.647;0.689)	0.689; 95% CI: (0.672;0.706)	0.658; 95% CI: (0.631;0.684)	0.64; 95% CI: (0.608;0.672)	0.58; 95% CI: (0.545;0.615)	0.742; 95% CI: (0.723;0.76)	0.611; 95% CI: (0.565;0.657)
WNT_Pathway	0.558; 95% CI: (0.54;0.576)	0.596; 95% CI: (0.574;0.619)	0.596; 95% CI: (0.561;0.632)	0.609; 95% CI: (0.577;0.641)	0.827; 95% CI: (0.804;0.851)	0.713; 95% CI: (0.697;0.729)	0.79; 95% CI: (0.77;0.81)	0.514; 95% CI: (0.521;0.55)	0.738; 95% CI: (0.719;0.758)	0.521; 95% CI: (0.501;0.54)	0.693; 95% CI: (0.666;0.72)	0.617; 95% CI: (0.588;0.646)	0.634; 95% CI: (0.602;0.666)	0.851; 95% CI: (0.839;0.864)	0.604; 95% CI: (0.569;0.64)
WNT_Pathway_Cell_Fate_Proliferation_Differentiation_Adhesion_and_Survival	0.533; 95% CI: (0.513;0.554)	0.549; 95% CI: (0.526;0.573)	0.632; 95% CI: (0.6;0.664)	0.614; 95% CI: (0.585;0.644)	0.738; 95% CI: (0.716;0.761)	0.702; 95% CI: (0.687;0.717)	0.757; 95% CI: (0.736;0.778)	0.51; 95% CI: (0.527;0.546)	0.7; 95% CI: (0.679;0.722)	0.56; 95% CI: (0.54;0.58)	0.669; 95% CI: (0.644;0.695)	0.501; 95% CI: (0.527;0.529)	0.582; 95% CI: (0.549;0.616)	0.782; 95% CI: (0.772;0.792)	0.538; 95% CI: (0.501;0.577)

## Sheet: Gene biomarkers
gene	breast	central_nervous_system	cervix	endometrium	haematopoietic_and_lymphoid_tissue	kidney	large_intestine	liver	lung	ovary	prostate	skin	stomach	thyroid	urinary_tract
APC	0.549; 95% CI: (0.542;0.556)	0.56; 95% CI: (0.554;0.565)	0.539; 95% CI: (0.524;0.553)	0.512; 95% CI: (0.51;0.534)	0.555; 95% CI: (0.549;0.562)	0.554; 95% CI: (0.548;0.561)	0.863; 95% CI: (0.845;0.88)	0.545; 95% CI: (0.533;0.556)	0.528; 95% CI: (0.518;0.539)	0.546; 95% CI: (0.538;0.555)	0.556; 95% CI: (0.551;0.562)	0.512; 95% CI: (0.504;0.527)	0.502; 95% CI: (0.516;0.52)	0.557; 95% CI: (0.552;0.563)	0.55; 95% CI: (0.54;0.561)
BRAF	0.546; 95% CI: (0.54;0.552)	0.548; 95% CI: (0.541;0.554)	0.542; 95% CI: (0.532;0.552)	0.532; 95% CI: (0.519;0.544)	0.551; 95% CI: (0.547;0.555)	0.551; 95% CI: (0.546;0.556)	0.521; 95% CI: (0.507;0.535)	0.551; 95% CI: (0.547;0.555)	0.506; 95% CI: (0.507;0.518)	0.551; 95% CI: (0.546;0.556)	0.543; 95% CI: (0.535;0.552)	0.678; 95% CI: (0.652;0.705)	0.519; 95% CI: (0.504;0.533)	0.761; 95% CI: (0.737;0.786)	0.542; 95% CI: (0.531;0.554)
DNAH5	0.53; 95% CI: (0.519;0.541)	0.555; 95% CI: (0.546;0.564)	0.542; 95% CI: (0.524;0.56)	0.519; 95% CI: (0.505;0.544)	0.568; 95% CI: (0.559;0.576)	0.562; 95% CI: (0.554;0.571)	0.583; 95% CI: (0.565;0.601)	0.539; 95% CI: (0.52;0.557)	0.569; 95% CI: (0.55;0.587)	0.558; 95% CI: (0.548;0.567)	0.568; 95% CI: (0.56;0.576)	0.767; 95% CI: (0.74;0.795)	0.533; 95% CI: (0.51;0.557)	0.571; 95% CI: (0.564;0.577)	0.505; 95% CI: (0.525;0.536)
MUC16	0.542; 95% CI: (0.528;0.556)	0.575; 95% CI: (0.562;0.589)	0.539; 95% CI: (0.51;0.568)	0.536; 95% CI: (0.505;0.567)	0.614; 95% CI: (0.6;0.628)	0.571; 95% CI: (0.556;0.585)	0.553; 95% CI: (0.533;0.572)	0.51; 95% CI: (0.52;0.54)	0.659; 95% CI: (0.637;0.681)	0.609; 95% CI: (0.598;0.62)	0.571; 95% CI: (0.551;0.592)	0.8; 95% CI: (0.773;0.828)	0.583; 95% CI: (0.553;0.613)	0.613; 95% CI: (0.601;0.624)	0.572; 95% CI: (0.531;0.614)
PTEN	0.511; 95% CI: (0.502;0.52)	0.533; 95% CI: (0.52;0.547)	0.501; 95% CI: (0.519;0.52)	0.814; 95% CI: (0.784;0.844)	0.541; 95% CI: (0.537;0.544)	0.523; 95% CI: (0.514;0.531)	0.507; 95% CI: (0.505;0.519)	0.533; 95% CI: (0.523;0.542)	0.527; 95% CI: (0.519;0.535)	0.537; 95% CI: (0.531;0.543)	0.531; 95% CI: (0.522;0.54)	0.511; 95% CI: (0.502;0.524)	0.516; 95% CI: (0.503;0.529)	0.54; 95% CI: (0.535;0.545)	0.529; 95% CI: (0.517;0.542)
TTN	0.561; 95% CI: (0.545;0.577)	0.611; 95% CI: (0.596;0.627)	0.527; 95% CI: (0.51;0.565)	0.553; 95% CI: (0.518;0.588)	0.671; 95% CI: (0.657;0.686)	0.589; 95% CI: (0.572;0.606)	0.636; 95% CI: (0.615;0.657)	0.523; 95% CI: (0.51;0.556)	0.667; 95% CI: (0.644;0.689)	0.601; 95% CI: (0.584;0.619)	0.606; 95% CI: (0.583;0.63)	0.776; 95% CI: (0.748;0.804)	0.658; 95% CI: (0.626;0.691)	0.681; 95% CI: (0.671;0.692)	0.644; 95% CI: (0.601;0.687)
